# Supplementary material for: Imbalance in obesity and mental health among “little emperors” in China
Source: PLoS One. 2019 Apr 10;14(4):e0207129. doi: 10.1371/journal.pone.0207129 (PMC6457487; doi:10.1371/journal.pone.0207129)
Supplement: S2 Text — (XLSX) [file pone.0207129.s002.xlsx]

## Sheet: 剔除异常值（1348）
T0depression	T0anxiety	T1depression	T1anxiety	Height	Weight	WC	HC	SBP	DBP	FBG	TC	TG	HDL-C	LDL-C	BMI	WHR	WtHR	Family location	Number of siblings	How much time do you spend with your father in elementary school?	How much time do you spend with your mother in elementary school?	Father’s education level	Mother’s education level	Family financial situation	Sleeping hours	Skipping breakfast	Vigorous	Moderate
31	35	41	35	153.2	34.6	58	67	98	60	4.4	3	0.87	0.95	2.43	14.7421	0.865672	0.37859	2	2	5	5	4	3	3	3	1	1	2
35	24	35	25	171.7	46.1	63	78	110	70	3.9	4.9	1.32	1.43	1.99	15.6372	0.807692	0.366919	5	1	4	5	5	3	3	3	2	2	1
31	34	37	26	146.5	38.9	72	77.7	102	62	4.6	3.5	1.21	1.09	2.87	18.1248	0.926641	0.491468	5	2	5	5	5	5	4	3	2	2	1
27	31	42	35	161.5	46.8	62	80	116	80	4.5	4.3	1	1.16	3.03	17.9432	0.775	0.383901	4	1	5	5	4	4	4	3	1	3	2
31	26	49	33	154.5	36.4	56	72	90	60	4.2	3.4	1.35	1.41	3.52	15.2491	0.777778	0.36246	5	1	3	4	3	3	3	3	2	1	1
30	28	47	32	164.3	40.6	55	73	102	70	3.7	3.3	0.78	1.27	2.59	15.0401	0.753425	0.334753	5	2	5	5	5	5	4	3	1	3	2
32	23	50	35	144	46.1	74	81	108	68	4.4	4.5	0.69	1.99	1.97	22.2319	0.91358	0.513889	3	1	4	4	5	4	3	3	1	1	4
29	35	31	36	166.5	48.7	62	83	106	72	4.3	3.2	1.04	1.42	2.12	17.5671	0.746988	0.372372	2	2	4	4	4	4	4	3	1	2	1
38	35	40	34	152	34.9	58	71	110	70	3.9	4.1	0.55	1.59	2.12	15.1056	0.816901	0.381579	2	2	5	5	4	4	3	3	1	2	1
35	35	43	35	158.5	53.3	76	84	100	68	4	4	0.57	1.66	1.97	21.2163	0.904762	0.479495	5	2	5	5	4	5	4	2	3	2	2
36	23	31	26	160.4	69.3	86	95.8	130	80	4.6	3.6	0.58	1.69	2.64	26.9355	0.897704	0.53616	5	2	5	5	5	5	3	2	1	2	4
31	27	33	30	156.3	43.5	75	80	106	68	4.3	4.7	0.47	2.33	2.77	17.8062	0.9375	0.479846	5	2	5	5	5	5	3	2	1	2	1
32	36	46	30	144	33.7	68	73	110	60	4.7	4.2	0.77	0.91	2.07	16.2519	0.931507	0.472222	5	1	3	4	5	5	3	3	3	2	3
45	36	30	30	161	52.8	79	88	120	70	4.77	3.91	0.65	1.98	2.64	20.3696	0.897727	0.490683	2	2	4	5	4	4	2	2	1	3	2
47	39	43	34	150.1	43.9	70.5	78.7	106	76	5.26	4.49	0.48	1.77	2.23	19.4851	0.895807	0.469687	5	2	5	5	5	5	3	2	2	1	1
26	25	31	27	155	46.6	80	86	106	62	4.16	5.36	0.79	1.09	2.31	19.3965	0.930233	0.516129	5	1	4	5	6	4	3	3	1	1	3
31	29	48	38	152	41.1	68	77	110	70	4.85	3.98	0.54	1.94	1.94	17.7891	0.883117	0.447368	2	2	5	5	4	4	3	3	1	2	2
32	26	37	27	152.2	52.7	84	90	108	68	4.97	5.36	1.08	0.98	2.05	22.75	0.933333	0.551905	2	2	4	5	3	4	3	3	2	2	2
37	32	39	32	158.5	38.9	68.8	74	90	60	4.42	4.85	0.42	1.1	0.98	15.4843	0.92973	0.434069	1	2	5	5	4	4	4	2	4	2	2
41	27	44	41	152.2	42.5	73.7	81	112	70	4.14	3.78	0.55	1.41	2.23	18.3468	0.909877	0.484231	3	1	3	3	5	5	4	2	1	1	1
34	27	46	35	148	40	68.7	78	102	60	4.47	3.76	0.46	1.28	1.89	18.2615	0.880769	0.464189	5	2	4	5	5	4	3	3	1	1	2
40	38	41	31	159.5	43.3	75	81	108	70	4.39	4.56	0.77	1.02	2.15	17.0203	0.925926	0.470219	2	2	4	4	5	4	3	3	1	2	2
44	43	46	41	155.2	37.3	66.7	73	100	68	3.8	4.51	0.84	1.51	2.31	15.4855	0.913699	0.429768	5	2	5	5	5	5	3	3	3	1	1
26	26	33	24	154	42	74	82	102	70	4.05	4.52	0.81	1.56	1.71	17.7096	0.902439	0.480519	5	1	2	5	4	5	3	2	1	1	4
34	31	29	29	161	45.7	77	83	114	70	4.99	3.24	0.65	1.75	1.61	17.6305	0.927711	0.478261	5	2	4	5	5	4	3	2	1	2	4
46	35	50	35	155.7	39.4	75.6	80	106	70	4.07	4.42	0.79	1.55	3.13	16.2525	0.945	0.485549	5	1	2	5	1	4	3	2	3	1	1
34	30	47	34	166.3	43.4	76	80	100	70	4.07	4.21	0.83	0.99	1.84	15.693	0.95	0.457005	5	2	5	5	5	4	3	3	3	2	1
46	35	47	45	156	44.8	74.5	82	104	70	4.16	3.19	0.52	1.27	1.86	18.4089	0.908537	0.477564	5	2	2	2	4	4	3	3	3	1	1
38	37	45	35	156.3	42.6	75	82	110	68	3.89	5.12	0.7	1.4	2.82	17.4378	0.914634	0.479846	5	2	4	4	5	5	4	2	1	2	1
46	30	39	36	151.2	42.3	76	79	110	70	5.41	4.8	0.84	1.93	1.92	18.5028	0.962025	0.502646	5	2	4	5	5	4	5	3	1	2	3
26	34	50	34	160.5	41.3	60	74	104	70	4.34	4.02	0.9	1.44	1.84	16.0325	0.810811	0.373832	5	2	4	5	3	3	3	2	2	2	1
36	36	41	37	137.2	29.6	52	65	102	62	4.47	3.96	0.56	1.95	2.25	15.7247	0.8	0.379009	5	2	3	4	5	5	4	3	1	2	2
32	30	44	35	177.5	56	64	82	102	72	5.58	3.28	0.82	1.34	2.02	17.7743	0.780488	0.360563	5	2	5	5	4	4	3	3	1	3	4
26	29	37	35	165.2	41.8	57	73	110	70	3.86	4.08	0.77	1.87	1.86	15.3164	0.780822	0.345036	3	1	4	4	5	4	3	2	1	2	2
45	35	48	31	150.3	34.5	55	70	104	70	4.01	3.52	0.75	0.98	1.53	15.2722	0.785714	0.365935	1	2	4	5	4	4	3	3	2	1	1
38	35	39	35	155.5	41.5	60	77	120	80	4.36	5.04	0.62	1.9	2.33	17.1628	0.779221	0.385852	3	2	4	4	4	4	3	3	1	1	2
31	39	33	42															5	2	4	5	6	6	4	2	1	2	2
35	29	34	30	162.5	44.4	58	79	100	68	4.31	5.23	1.83	0.75	1.32	16.8142	0.734177	0.356923	5	1	4	2	5	4	4	3	2	2	2
35	32	50	31	157	38.3	58	73	110	72	3.75	5.5	0.73	2.01	3	15.5382	0.794521	0.369427	1	2	5	5	4	4	4	3	1	3	2
31	30	27	28															4	2	5	5	5	4	4	3	1	2	2
39	36	45	35	164	44.3	60	77	106	70	5.31	3.65	0.66	1.74	1.79	16.4709	0.779221	0.365854	5	1	5	5	3	4	3	3	3	2	1
41	35	44	29	156.2	39	58	74	108	62	4.16	4.51	0.52	1.67	2.15	15.9846	0.783784	0.371319	5	1	4	4	4	4	3	2	3	2	1
37	35	42	34	153	39.4	58	75	104	70	5.31	3.78	0.97	1.15	2.56	16.8311	0.773333	0.379085	3	2	3	4	5	5	4	2	1	2	2
37	35	41	32	151.3	34.8	53	70	102	70	4.14	2.97	0.77	1.42	2.2	15.202	0.757143	0.350297	1	2	5	5	4	3	3	4	1	2	3
36	32	48	39	155.6	45.4	68	78	92	60	4.35	4.66	1.54	1.59	1.94	18.7515	0.871795	0.437018	3	2	2	5	4	2	3	2	2	2	2
35	32	33	34	166	37	55	71.5	110	70	4.45	4.91	0.65	2.29	1.81	13.4272	0.769231	0.331325	1	2	5	5	4	4	3	3	1	2	4
37	31	48	35	149.2	35.1	57	73	118	78	4.46	4.53	1.03	1.19	3.52	15.7677	0.780822	0.382038	5	2	1	5	1	5	2	2	1	1	1
38	35	33	28	161.3	46.6	65	81	120	78	4.33	5.44	0.77	0.91	2.85	17.9109	0.802469	0.402976	1	1	3	4	4	4	3	3	1	4	3
40	47	38	43	157.5	46.3	74.5	84	104	68	3.9	4.08	0.99	1.03	1.58	18.6647	0.886905	0.473016	5	1	5	5	4	4	3	3	1	1	2
41	27	45	35	159.5	53.6	83	90	100	68	5.53	3.9	0.49	2.03	1.92	21.069	0.922222	0.520376	3	2	5	5	4	5	3	2	1	1	1
36	35	29	31	155	41.6	69	77	108	78	5.06	5.23	0.92	1.42	3.06	17.3153	0.896104	0.445161	1	2	5	5	3	4	3	3	1	2	1
24	23	24	28	158.2	47.4	71	81	104	80	4.56	3.56	1.23	1.31	2.87	18.9394	0.876543	0.448799	5	2	5	5	5	4	3	1	1	1	4
39	35	38	36	157	52	83	91	104	70	4.57	4.36	1.11	1.48	1.5	21.0962	0.912088	0.528662	5	2	5	5	5	4	4	2	3	2	4
22	23	30	24	162	40.2	68	75	108	70	4.82	4.61	0.71	1.49	3.86	15.3178	0.906667	0.419753	3	1	4	4	5	4	3	2	1	2	1
32	26	31	24	161.4	67.7	85.7	96	108	74	4.69	4.35	0.74	0.94	1.45	25.9885	0.892708	0.530979	5	2	5	5	4	4	3	2	1	1	1
48	37	46	44	158	43	74	80	102	65	4	4	0.41	1.04	1.81	17.2248	0.925	0.468354	5	2	3	5	4	4	3	2	1	1	1
27	25	36	24	156.5	56.4	77	88	110	70	4.65	4.44	0.55	2.03	3.6	23.0277	0.875	0.492013	3	2	2	5	4	2	3	2	2	2	2
46	41	51	36	153.8	41.7	70	78	110	70	5.45	3.08	0.59	1.97	2.38	17.6288	0.897436	0.455137	5	2	3	5	2	2	3	2	3	2	2
45	35	47	35	152.5	49.6	74	83	114	70	4.26	4.91	0.7	1.14	3.42	21.3276	0.891566	0.485246	3	2	5	5	5	5	3	2	3	1	2
35	33	54	38	148	45.5	72	83	110	70	4.51	3.68	0.69	1.53	1.45	20.7725	0.86747	0.486486	3	2	1	5	4	4	4	3	3	3	2
37	27	40	27	148.7	38.9	69	77	110	70	4.08	5.6	0.83	1.54	1.92	17.5925	0.896104	0.464022	1	2	5	5	4	4	3	3	1	1	1
48	44	47	35	147.6	44.9	76	82.5	102	68	4.7	4.51	1.31	1.77	1.84	20.6098	0.921212	0.514905	5	2	5	5	4	3	3	3	1	2	2
41	30	41	36	162.3	47	79	82	110	70	4.35	5.56	0.59	1.82	3.52	17.8427	0.963415	0.486753	5	2	5	5	5	5	3	2	2	2	3
35	27	40	30	156.4	42.6	69	80	110	70	4.24	4.97	0.69	2.29	2.05	17.4155	0.8625	0.441176	5	1	4	4	4	4	3	2	1	2	2
36	35	46	35	161.5	44	73.6	78.7	90	64	4.8	5.17	0.48	1	2.67	16.8697	0.935197	0.455728	3	2	5	4	5	5	3	2	1	2	2
46	37	46	35	157.7	35.7	70	74	106	70	4.79	4.8	0.74	1.66	2.18	14.3551	0.945946	0.443881	5	2	4	4	4	4	3	3	3	2	2
45	26	40	33	156.5	45	75	82	100	62	4.92	4.95	1.05	1.45	2.93	18.3732	0.914634	0.479233	5	1	5	5	4	5	3	2	1	3	3
41	25	44	44	155.5	43	72	79	120	64	4	5.07	0.59	2.07	2.69	17.7831	0.911392	0.463023	2	2	3	5	3	2	3	2	2	2	2
36	25	36	29	157.2	39.8	73	77.5	100	65	4.27	4.45	1.04	1.49	2.95	16.1056	0.941935	0.464377	1	1	5	4	5	5	4	2	3	1	1
47	29	48	44	146.1	39.6	72	79	102	64	4.86	3.38	0.5	1.48	1.71	18.5522	0.911392	0.492813	5	2	5	5	6	5	3	3	3	2	2
38	35	45	35	170	87.2	91	100.1	105	80	5	3.5	1.66	1.06	1.52	30.173	0.909091	0.535294	5	1	5	5	6	6	4	3	1	4	2
43	33	47	34	145	32.3	54	66.5	110	70	5.7	4.7	0.4	1.84	2.72	15.3627	0.81203	0.372414	5	1	4	5	6	5	3	3	1	1	2
37	29	46	39	159.5	48.9	78.7	82.5	90	58	4.6	4.1	0.77	1.57	2.27	19.2215	0.953939	0.493417	5	1	5	5	5	5	4	2	1	3	2
25	23	27	29	154.4	42.4	67	79	100	70	4.8	3.8	0.45	1.35	2.28	17.7857	0.848101	0.433938	5	1	5	5	5	5	5	3	1	3	2
44	29	38	34	159.5	41.2	74	81	108	70	4.6	5.2	0.8	1.54	3.57	16.1948	0.91358	0.46395	5	2	2	2	4	4	3	2	2	1	4
30	26	35	32	153.8	44.6	72.7	79.6	104	50	4.5	4.3	0.77	1.38	2.65	18.8548	0.913317	0.472692	5	2	2	5	4	4	3	3	2	2	1
26	23	47	32	161	58.5	81	88	126	80	4.5	5	1.04	1.17	3.8	22.5686	0.920455	0.503106	5	2	5	5	4	4	4	3	1	2	4
23	35	50	35	174.5	56	62	85	100	60	5	5.2	0.61	1.5	3.77	18.3907	0.729412	0.355301	5	1	3	5	5	5	4	3	1	2	2
38	32	50	38	146.5	34.9	53	70	106	50	5.3	5.4	0.78	1.71	3.46	16.2611	0.757143	0.361775	5	1	4	5	6	5	3	3	2	3	2
33	22	44	34	150.3	43.2	72	80.5	114	70	4.9	5.5	0.77	1.48	3.66	19.1234	0.89441	0.479042	5	2	4	4	5	5	3	3	1	1	2
31	27	39	33	151.5	35.5	55	69	110	60	4.4	3.6	0.67	1.43	2.11	15.4669	0.797101	0.363036	5	2	3	5	4	4	3	2	1	3	3
48	35	44	27	165.6	50.4	62	79	110	70	4.9	4.2	0.87	1.39	2.65	18.3785	0.78481	0.374396	5	2	2	3	6	5	4	3	2	2	3
31	25	39	31	155.5	43.9	77.7	80	100	40	4.8	4.7	1.25	1.23	3.11	18.1553	0.97125	0.499678	5	1	4	5	5	6	3	2	1	2	2
44	30	37	31	164.4	52.9	79	88.7	80	58	4.5	3.8	0.56	1.71	2.03	19.5728	0.890643	0.480535	5	1	4	4	6	6	4	3	2	4	3
36	34	37	26	158	57.9	77.6	87	106	70	4.3	3.5	0.74	1.58	1.57	23.1934	0.891954	0.491139	5	1	2	5	5	5	3	3	3	1	3
42	26	45	32	150.2	44.3	72.5	84.5	100	60	5.4	4.1	0.93	1.8	2.04	19.6365	0.857988	0.48269	5	1	5	5	5	5	4	2	1	2	2
48	37	38	35	147.8	32.9	67	71	110	80	5.2	4.2	0.75	1.48	2.47	15.0608	0.943662	0.453315	3	2	4	4	6	6	5	3	1	4	4
24	27	47	35	167.5	53.1	70	81	108	70	5.2	3.9	0.7	1.25	2.5	18.9263	0.864198	0.41791	5	1	5	2	6	6	4	2	3	2	1
38	27	50	35	157.5	45.7	63	82	106	70	5	4.7	1.48	1.5	2.75	18.4228	0.768293	0.4	4	2	4	5	4	4	4	3	1	3	2
47	43	44	40	162.6	42.6	61	76	110	70	4.6	4.5	1.65	1.39	2.53	16.1127	0.802632	0.375154	2	2	4	5	5	4	3	3	1	2	2
36	32	50	35	145.5	32.7	55	69	100	60	5.3	2.8	0.63	1.36	1.15	15.4462	0.797101	0.378007	5	1	5	5	5	5	4	3	1	3	3
28	28	29	24	150.6	38.9	71	74.8	102	60	5.2	4.3	1.41	1.49	2.37	17.1514	0.949198	0.471448	5	1	3	4	5	6	5	1	1	2	3
29	35	50	35	157	40.1	60	72	90	68	4.9	3.9	0.75	1.48	2.26	16.2684	0.833333	0.382166	5	1	5	5	4	5	3	2	1	4	3
49	35	50	35	165	40.4	53	74	110	80	4.8	4.5	0.6	1.42	3.01	14.8393	0.716216	0.321212	5	1	5	5	5	5	3	2	2	2	2
32	26	38	35	172.6	50.6	65	79	104	70	5	3.3	0.36	1.43	1.69	16.9851	0.822785	0.376593	5	2	5	5	6	6	4	1	1	1	1
28	35	47	35	149.5	43.9	74	82.8	100	60	4.8	4	0.94	1.89	1.75	19.6418	0.89372	0.494983	4	1	3	4	6	2	4	3	4	2	1
46	27	37	32	158.6	42.2	69.6	77.7	108	65	5.2	4.5	0.68	1.77	2.59	16.7767	0.895753	0.43884	5	2	1	2	4	4	3	2	2	2	2
29	32	50	35	160.8	47.3	72	81.8	100	60	4.9	4.2	1.33	1.32	2.48	18.2932	0.880196	0.447761	5	2	3	5	4	5	3	2	1	2	2
46	24	39	30	176	50.3	62	81	100	66	4.5	3	0.48	1.3	1.48	16.2384	0.765432	0.352273	5	2	2	5	4	4	3	3	1	4	2
38	35	49	39	160.5	54.8	81.5	89	108	60	4.9	3.8	1.17	1	2.74	21.2731	0.91573	0.507788	5	2	4	4	4	4	3	3	3	2	2
29	23	34	29	159.4	49.5	74.6	81	100	60	5.1	3.2	0.57	1.14	2.02	19.4818	0.920988	0.468005	5	1	4	5	6	6	3	3	1	2	3
27	25	44	32	154.5	47.4	68	77	100	78	4.6	4	0.84	1.67	2.12	19.8574	0.883117	0.440129	5	1	4	5	6	6	4	3	1	3	2
33	24	50	40	152.6	39	70	76	110	70	5.1	5.6	0.67	1.28	3.99	16.7477	0.921053	0.458716	3	2	5	5	6	6	4	2	1	1	2
28	23	50	35	163.5	49.5	62	80	108	60	4.8	3.6	0.97	1.27	2.24	18.517	0.775	0.379205	5	1	4	5	5	5	3	3	2	2	2
37	34	45	29	175.3	51.4	60	79	110	60	4.9	3.3	0.57	1.38	1.86	16.7263	0.759494	0.34227	3	1	5	5	5	5	3	4	1	1	1
31	23	40	24	156.5	45.2	74	79	85	50	4.9	3.5	0.67	1.22	2.17	18.4548	0.936709	0.472843	5	2	2	5	4	4	5	3	1	4	4
37	22	46	30	160.6	51.1	70	81	108	70	5.3	4	0.71	1.2	2.86	19.8121	0.864198	0.435866	5	1	5	5	6	6	4	3	1	3	2
25	30	37	35	150.5	39.8	71	76.9	104	60	4.7	5	1.14	1.38	3.19	17.5715	0.923277	0.471761	5	1	3	3	6	5	3	3	1	1	1
34	35	47	35	174.5	57.2	65	80	120	84	5.4	3.1	0.45	1.31	1.55	18.7847	0.8125	0.372493	5	1	5	5	6	5	3	2	1	4	4
39	32	39	31	160.7	48.5	75.6	82.8	106	60	4.6	4.5	0.81	1.79	2.48	18.7806	0.913043	0.470442	5	2	5	5	5	5	3	3	1	2	3
46	35	46	42	149	51.6	84	89.6	106	80	5.3	5.8	2	1.28	4.15	23.2422	0.9375	0.563758	3	2	2	5	4	4	3	2	2	2	1
44	27	50	35	147.3	32.4	56	67	102	60	4.6	4.4	0.72	1.46	2.76	14.9327	0.835821	0.380177	5	1	3	5	5	5	3	3	1	2	3
48	28	46	36	166.6	50.9	77	84.7	104	60	4.6	3.7	0.91	1.34	2.21	18.3387	0.909091	0.462185	5	2	3	5	5	6	3	2	1	2	2
33	24	39	32	156.7	55.7	80	88.9	110	60	4.8	3.8	0.51	1.34	2.24	22.6839	0.899888	0.51053	5	2	4	4	5	6	3	2	1	2	2
47	35	50	37	163	39.4	58	77	106	70	4.9	3.6	1.23	1.35	1.81	14.8293	0.753247	0.355828	5	2	4	4	5	5	4	3	3	3	3
27	21	37	27	163.5	45.5	63	76	110	65	5.2	4.2	1.07	1.06	3.12	17.0206	0.828947	0.385321	3	1	4	5	5	4	3	3	1	2	2
46	37	45	38	158.5	40.4	71	76	106	65						16.0814	0.934211	0.44795	5	1	5	5	6	6	3	2	1	1	1
33	22	48	30	154.5	35.2	69.7	76	106	65	5.2	4.4	0.57	1.82	2.36	14.7464	0.917105	0.451133	5	1	5	5	5	4	3	3	1	2	2
40	35	52	41	153.2	38.8	72.5	79	110	70	4.8	3.4	0.73	1.28	1.93	16.5316	0.917722	0.473238	5	2	2	5	5	5	3	2	3	2	1
39	35	50	35	152.7	48.5	77	87	90	58	4.6	3.9	1.69	1.06	2.38	20.8	0.885057	0.504257	5	2	2	5	4	4	3	2	3	1	1
30	24	33	31	159.8	43.4	76	82.6	104	70	5	4.8	0.7	1.71	2.82	16.9956	0.920097	0.475594	3	2	4	4	4	4	5	3	1	2	1
44	35	42	41	155	34.7	64	72.7	102	65	2.5	3.5	0.48	0.57	2.04	14.4433	0.88033	0.412903	3	2	4	4	4	4	3	3	1	2	2
42	28	48	35	152	35.2	57	70	116	70	5	3.8	0.54	1.47	2.14	15.2355	0.814286	0.375	5	2	5	5	4	3	3	4	2	4	1
42	28	31	27	158	41	57	76	120	70	4.4	3.2	0.6	1.16	1.96	16.4236	0.75	0.360759	1	2	5	5	5	5	4	3	2	2	1
38	32	37	32	167.7	49	59	81	110	70	4.5	4.3	1.28	1.5	2.47	17.4233	0.728395	0.351819	5	2	5	5	5	4	3	3	1	3	2
36	35	41	35	154.5	37.1	69.5	76	100	65	4.1	5.4	0.71	1.74	3.46	15.5424	0.914474	0.449838	5	2	5	5	5	4	3	2	2	2	1
35	36	35	35	162	55.1	76	88.9	102	70	5.1	3.8	0.55	1.39	2.31	20.9953	0.854893	0.469136	3	1	5	5	6	6	4	2	1	2	3
40	28	47	29	157	37.3	70	74	106	65	5	4.5	0.73	1.53	2.92	15.1325	0.945946	0.44586	5	2	4	4	5	5	4	2	2	2	2
27	24	34	31	171	45.3	58	79	108	78	4.2	3.9	0.84	1.42	2.35	15.4919	0.734177	0.339181	5	2	4	4	5	5	3	2	1	2	1
29	32	47	36	176.3	54	65	81	108	70	4.5	3.7	0.74	1.46	2.06	17.3736	0.802469	0.36869	3	1	5	5	5	5	3	3	1	4	2
37	35	39	34	169	53.3	62	83	110	70	4.9	4.3	0.61	1.21	2.98	18.6618	0.746988	0.366864	3	1	3	3	6	2	3	3	1	2	2
38	31	36	28	152.3	43.8	76.7	82	104	78	4.9	3.7	0.82	1.22	2.31	18.8831	0.935366	0.503611	3	1	4	5	5	4	3	2	2	2	2
27	20	33	26	158	56.1	74	86	106	70	4.7	3.3	0.89	1.02	2.11	22.4724	0.860465	0.468354	3	2	4	5	5	4	3	2	1	2	2
45	26	46	44	154.7	39.1	59	74	104	50	5.1	4.4	1.05	1.31	2.92	16.3379	0.797297	0.381383	5	2	5	5	5	4	3	2	3	1	1
28	23	38	29	147.7	37.9	70	74.5	108	58	5.1	3.8	0.56	1.42	2.3	17.3731	0.939597	0.473934	5	1	5	5	6	6	3	3	1	2	2
41	46	50	39	158.2	39.8	69.5	75.5	102	65	5	4.7	1.12	1.28	2.88	15.9027	0.92053	0.439317	5	2	5	5	5	5	4	2	1	2	1
42	35	44	33	151.7	36.9	67	73	100	60	4.2	3.8	0.88	0.98	2.78	16.0345	0.917808	0.441661	1	2	5	5	4	4	3	2	1	2	1
46	30	41	42	167.5	43.1	58	76	104	60	4.5	3.6	1.43	1.26	2.11	15.362	0.763158	0.346269	5	1	5	5	5	5	4	3	1	1	1
35	26	42	29	152.3	34.6	71	73.7	100	65	4.9	3	1.09	1.06	1.65	14.9168	0.963365	0.466185	1	2	5	5	5	4	2	3	3	2	2
31	27	29	32	158.5	40.5	60	74	102	60	4.9	4	0.87	1.31	2.34	16.1212	0.810811	0.378549	5	1	5	5	5	5	3	2	1	2	2
27	22	36	36	182.8	65.2	70	87	102	60	4.2	4	0.58	1.42	2.31	19.5117	0.804598	0.382932	5	2	5	5	5	4	4	2	3	4	2
36	32	46	29	160	44	59	78	98	50	4.7	3.9	1.92	0.94	2.5	17.1875	0.75641	0.36875	5	1	4	4	4	5	3	3	3	2	2
40	35	49	35	162	39.9	57	72	100	58	4.9	3.4	0.64	1.47	1.74	15.2035	0.791667	0.351852	5	1	5	5	5	4	5	2	1	1	1
44	29	50	38	156.5	50.1	72	84	106	70	4.9	3.8	1.02	1.36	2.13	20.4554	0.857143	0.460064	5	1	5	5	6	6	5	3	1	4	1
38	42	40	33	160.5	43.2	59	77	108	60	4.7	4.4	1.46	1.18	3.04	16.77	0.766234	0.367601	5	2	3	4	6	4	5	3	1	2	2
32	25	38	31	147	29.7	62	67	102	65	4.9	4.5	1.4	1.76	2.32	13.7443	0.925373	0.421769	5	1	2	2	6	6	4	2	1	3	2
31	31	38	27	172.2	76	90	100	106	68	4.3	4.5	1.62	1.04	3.07	25.6299	0.9	0.522648	5	1	4	4	4	4	4	3	1	2	2
48	35	50	35	166.5	44.3	57	78	110	60	4.5	3.5	0.84	1.19	2.08	15.9799	0.730769	0.342342	5	2	5	5	6	4	3	2	2	2	2
29	26	50	35	159.2	40.3	58	75	102	60	5	3.5	0.47	1.44	1.93	15.9008	0.773333	0.364322	5	1	4	4	4	4	3	3	1	1	1
37	35	41	34	161	42.4	59	75	90	58	4.5	5.1	0.8	1.59	3.21	16.3574	0.786667	0.36646	5	1	4	4	4	4	4	3	3	2	1
38	35	50	35	169.5	46.1	58	78	106	60	4.6	3.7	0.85	1.76	1.62	16.0458	0.74359	0.342183	5	2	5	5	5	5	4	3	1	2	2
39	24			160.3	60.7	83	92	106	70	4.5	3.2	0.8	1.52	1.42	23.6223	0.902174	0.517779	5	1	5	5	4	5	3	2	2	1	2
40	41	42	37	155.4	36	70.7	73	100	60	5.3	5.6	1.51	1.45	3.65	14.9074	0.968493	0.454955	3	2	5	5	4	4	3	3	3	2	2
38	29	50	35	168	45.3	60	78	100	60	4.6	3.2	1.02	0.9	2.13	16.0502	0.769231	0.357143	5	1	4	5	5	4	3	3	2	4	4
30	23	30	44	165	47	63	79	90	56	5	4.2	1.31	1.44	2.48	17.2635	0.797468	0.381818	5	2	2	2	5	5	3	3	2	2	2
38	32	34	29	162	48.4	64.5	79	120	70	4.4	3.9	0.44	1.36	2.58	18.4423	0.816456	0.398148	3	2	4	5	4	4	4	2	1	2	2
45	33	34	34	159.5	62.2	80	90	100	58	4.4	3.6	1.86	1.23	1.96	24.4494	0.888889	0.501567	3	2	4	4	3	4	3	2	2	2	2
40	30	45	35	161.8	49.8	71.8	83	100	58	4.6	3.7	0.71	2.05	1.4	19.0227	0.86506	0.443758	5	1	4	5	6	4	3	3	1	1	1
41	38	45	35	174	52.4	61	71	90	58	4.6	4.3	0.87	1.41	2.6	17.3074	0.859155	0.350575	5	2	5	5	4	4	3	3	1	2	2
36	28	35	29	154.7	42.3	74	79.6	100	60	4.5	4.2	0.72	0.95	3.36	17.675	0.929648	0.478345	5	2	1	5	1	4	2	3	1	1	2
47	35	49	34	152	32.8	66.7	75	102	60	4.6	4.3	1.03	1.52	2.59	14.1967	0.889333	0.438816	5	2	5	5	4	5	3	2	1	2	1
48	35	47	33	153.6	38.1	73	76.8	106	78	5.2	4	0.54	1.48	2.43	16.1489	0.950521	0.47526	5	2	5	5	5	5	3	3	3	2	2
44	35	47	39	159.5	45.4	59	79	106	68	4.2	3.1	0.93	1.16	1.77	17.8457	0.746835	0.369906	5	1	4	4	5	4	3	3	1	2	4
41	33	45	30	157	45.5	76	79.6	106	60	5.5	4.2	1.47	1.12	2.91	18.4592	0.954774	0.484076	5	2	4	5	5	5	3	2	1	2	3
31	26	50	35	154	43.1	59	75	110	68	4.8	3.8	0.46	1.56	2.26	18.1734	0.786667	0.383117	5	2	5	5	4	4	3	2	1	2	2
42	35	50	35	150.7	41.4	60	74	110	60	4.9	3.6	0.92	1.47	1.86	18.2295	0.810811	0.398142	5	1	3	5	1	4	3	1	1	3	3
40	26	50	35	157	38.7	61	73	110	70	4.6	4.5	0.77	1.64	2.59	15.7004	0.835616	0.388535	5	2	5	5	5	5	3	2	1	3	2
43	36	47	34	158.6	50.2	80.7	85.7	98	58	5.2	3.4	0.58	0.94	2.41	19.9571	0.941657	0.508827	3	2	3	5	4	4	4	3	1	1	1
45	35	53	43	164.2	49.5	62	81	100	50	4.2	3.5	0.87	1.36	2.03	18.3594	0.765432	0.377588	5	2	4	4	4	4	4	2	3	1	1
45	34	42	32	152.2	46.4	73	82	100	78	4.6	3.5	0.55	1.13	2.23	20.0304	0.890244	0.479632	5	2	3	5	4	4	4	3	3	1	1
27	29	30	37	167	46.7	61	79	102	70	4.8	3.5	0.6	1.44	1.89	16.745	0.772152	0.365269	5	2	5	5	5	5	3	3	2	2	2
45	35	42	32	151.5	34.3	54	69	100	60	4.7	4	0.62	1.48	2.27	14.9441	0.782609	0.356436	5	1	4	4	5	4	3	3	1	4	2
31	29	50	35	176	52.9	60	81	110	78	3.76	5.01	0.97	1.51	2.38	17.0777	0.740741	0.340909	1	2	5	5	5	4	2	4	1	2	2
41	35	48	37	168.5	53.3	61.5	82.5	110	70	4.8	3.78	1.36	1.25	2.72	18.7727	0.745455	0.364985	5	2	5	5	6	5	5	2	1	2	2
26	31	20	65	162.5	49	63	82	104	70	3.95	4.52	0.88	1.26	2.98	18.5562	0.768293	0.387692	3	2	2	5	5	5	3	2	3	2	3
32	29	28	31	168.7	57.9	71	84	120	78	3.82	4.44	0.73	1.51	2.41	20.3446	0.845238	0.420865	3	2	5	5	4	4	3	2	4	1	1
23	32	43	35	156.5	41.6	62	76	100	70	4.32	5.07	0.74	1.2	2.41	16.985	0.815789	0.396166	4	2	4	4	5	5	3	2	1	2	1
29	23	43	35	157.5	54.7	67	86.5	120	80	3.7	5.11	0.63	1.74	2.43	22.0509	0.774566	0.425397	5	2	4	5	4	4	3	3	3	3	2
28	35	50	35	160.5	41	60	73	110	70	4.49	4.93	1.17	1.11	2.33	15.916	0.821918	0.373832	5	2	5	5	6	6	3	2	1	4	4
33	35	47	35	168	70.8	78	93	110	70	3.7	3.97	0.48	1.81	2.93	25.085	0.83871	0.464286	5	1	5	5	4	4	3	4	2	2	2
24	23	42	31	181.2	83.6	86	102	110	80	4.68	4.17	1.11	1.54	1.84	25.4618	0.843137	0.474614	4	1	5	5	5	5	4	2	2	4	4
28	31	50	35	168	52.5	60	81	118	70	4.99	4.26	0.45	1.31	2.25	18.6012	0.740741	0.357143	4	2	4	4	4	2	3	3	3	2	4
38	37	50	41	165	52.1	66	86	108	80	4.18	4.98	1.09	1.11	2.77	19.1368	0.767442	0.4	5	2	4	5	5	4	4	3	3	2	3
28	26	29	26	157.8	48.5	64	81.5	108	68	3.93	3.84	0.42	1.32	2.07	19.4773	0.785276	0.405577	4	2	4	5	4	4	3	2	3	1	1
28	21	39	30	162.3	40.4	74.8	77	106	70	4.31	4.93	0.82	1.32	2.1	15.3371	0.971429	0.460875	4	2	2	2	4	3	3	2	1	1	3
33	29	43	38	148	39	70	80	100	68	3.85	5.1	0.39	1.87	2.77	17.805	0.875	0.472973	4	1	5	5	4	5	3	3	1	2	2
35	27	40	28	159.5	39.4	72	77	100	66	4.23	3.88	0.75	1.32	3	15.4873	0.935065	0.451411	4	2	4	4	4	4	3	3	3	2	2
44	35	49	44	150	39.4	73.8	80	102	72	5.06	3.51	0.77	1.17	2.75	17.5111	0.9225	0.492	1	2	5	5	4	4	3	2	3	1	1
30	34	31	28	151.8	38.6	70.8	78	108	68	4.37	4.26	0.5	1.56	2.59	16.7511	0.907692	0.466403	4	2	4	5	4	3	3	2	1	2	4
28	31	47	33	155	41.6	73	80	104	70	4.59	3.97	0.36	1.56	1.71	17.3153	0.9125	0.470968	3	1	5	5	5	4	4	2	3	2	3
47	25	41	37	151.6	41.4	73.8	79	100	70	5.02	5.67	1.61	1.37	2.82	18.0137	0.934177	0.486807	5	2	5	5	5	3	4	3	1	2	1
49	38	50	33	153	51.9	79	87	104	70	5.15	3.77	0.77	1.59	2.18	22.171	0.908046	0.51634	4	1	5	5	5	5	3	2	2	2	2
25	34	34	29	164.3	42.1	72	78	86	60	4.65	4.37	0.62	1.33	1.53	15.5958	0.923077	0.438223	5	2	5	5	5	4	3	3	1	1	1
21	22	23	26	150.6	41.4	72	80	120	80	5.32	3.79	0.93	1.4	2.56	18.2537	0.9	0.478088	4	2	5	5	4	4	3	3	1	2	1
33	33	30	32	150.4	48.8	75.8	83	108	62	4.75	4.34	0.4	1.93	2.15	21.5737	0.913253	0.503989	4	1	5	5	6	5	4	2	3	2	2
31	25	42	23	162.4	65.9	91	96	110	64	4.62	3.39	1.29	1.19	2.23	24.987	0.947917	0.560345	4	2	5	5	4	5	3	2	2	2	2
28	30	43	30	150.2	45.9	75	84	104	68	4	4.04	0.57	1.08	3.26	20.3457	0.892857	0.499334	4	2	5	5	4	4	3	2	2	2	2
36	46	50	40	155.2	43.5	73.5	79	108	68	4.41	4.77	1.71	1	2.23	18.0595	0.93038	0.473582	4	2	4	4	4	4	3	2	2	1	2
46	30	47	34	157.5	57.7	83	89	110	70	3.95	3.37	0.67	1.47	2.82	23.2603	0.932584	0.526984	5	2	5	5	4	3	3	2	2	2	2
42	38	45	32	159.3	46.7	74.3	81	112	70	3.81	4.31	0.92	2.08	2.25	18.4029	0.917284	0.466416	4	2	4	5	5	5	4	3	1	2	2
35	36	44	47	161.3	44	77.5	84	110	78	4.28	3.87	0.73	1.49	2.75	16.9116	0.922619	0.480471	1	2	1	5	1	3	3	4	1	1	1
34	31	32	40	161.1	46.7	74.6	82	120	70	4.75	4.26	0.92	1.29	2.2	17.9939	0.909756	0.463066	2	2	5	5	5	4	4	2	1	1	1
24	26	26	28	158.1	47.5	77	85	120	80	4.77	5.75	0.46	1.49	1.76	19.0033	0.905882	0.487034	4	2	4	4	5	4	3	3	1	2	2
46	37	40	31	169	48.5	77	86	110	70	3.86	4.58	0.61	1.12	2.43	16.9812	0.895349	0.455621	4	2	4	5	2	2	4	3	1	2	1
37	34	42	33	158.3	50.4	66	81	120	78	4.8	4.1	1.06	1.31	2.71	20.1126	0.814815	0.41693	1	2	4	4	4	4	3	2	1	3	2
32	30	35	30	156.3	43.1	59	74	106	70	4.5	3.4	1.91	1.14	1.86	17.6425	0.797297	0.377479	1	2	5	5	5	3	3	2	1	3	1
33	29	42	45	165.6	50.1	64	80	106	78	4.5	4	0.84	0.99	2.82	18.2691	0.8	0.386473	1	2	4	4	6	6	4	3	1	4	4
33	34	33	30	165	49.6	61	80	108	60	4.5	4.5	0.96	1.27	2.99	18.2185	0.7625	0.369697	1	1	5	5	4	4	3	4	1	4	4
29	32	56	41	169.2	47.2	62	79	104	60	4.6	2.3	1.29	0.58	1.33	16.487	0.78481	0.36643	1	2	4	4	4	4	3	3	1	2	2
46	29	50	35	170	63.8	72	88.5	106	70	4.4	4.1	0.76	1.39	2.62	22.0761	0.813559	0.423529	1	2	5	5	6	6	4	3	1	4	4
47	38	51	35	154.5	38.1	58	73	90	50	3.7	4	1.1	1.23	2.63	15.9613	0.794521	0.375405	4	2	1	5	4	4	3	3	1	3	2
43	26	53	44	160.8	37	56	70	104	60	4	4.6	0.47	1.58	2.91	14.3097	0.8	0.348259	4	2	4	4	4	4	2	3	3	2	1
48	32	39	33	166.8	52.6	65	81	98	66	4.9	5	0.99	1.46	3.16	18.9057	0.802469	0.389688	4	2	5	5	5	4	3	3	1	3	1
41	35	45	46	162	50.1	66	80	100	60	4.3	3.7	2.07	1.3	1.9	19.0901	0.825	0.407407	1	2	2	2	5	4	3	3	1	3	4
37	25	42	38	157.5	44.8	62	79	106	60	4.5	4.9	0.73	1.72	2.99	18.06	0.78481	0.393651	1	2	4	5	4	4	3	2	1	2	3
31	22	43	29	168.5	57	70	88.5	120	70	5.3	4.7	0.88	1.37	3.16	20.0759	0.79096	0.41543	1	2	5	5	5	5	3	2	1	2	2
35	25	41	42	174.4	54.7	70	83.5	110	70	5.3	3.2	0.73	1.21	1.75	17.9843	0.838323	0.401376	4	2	2	4	5	4	3	3	1	3	1
30	26	24	27	162.6	56	67	83	110	70	4.8	4	0.9	1.35	2.49	21.181	0.807229	0.412054	4	1	4	5	6	5	3	3	1	2	2
38	35	36	33	167.4	59.1	67	88	110	70	4.8	3.5	1.05	1.3	1.92	21.09	0.761364	0.400239	5	1	2	2	4	3	4	2	4	4	4
41	34	40	35	170	56.9	66	82	120	70	4.5	3.4	0.95	1.01	2.15	19.6886	0.804878	0.388235	5	1	5	5	6	4	5	2	1	4	2
38	31	50	35	158	53.7	78.5	88.5	100	60	4.3	4.2	0.67	1.58	2.49	21.511	0.887006	0.496835	1	2	5	5	6	5	2	2	3	4	4
38	40	52	35	146	39.6	74	81	90	58	4	4.3	0.68	1.4	2.78	18.5776	0.91358	0.506849	1	2	3	4	3	4	2	2	2	1	2
26	29	45	33	154.2	42.4	74	81	102	60	4.4	4.2	0.5	1.83	2.18	17.8319	0.91358	0.479896	4	2	5	5	4	4	3	3	1	3	3
28	34	27	30	152.8	38.7	67	80	104	60	4.4	4.6	0.98	1.39	2.94	16.5754	0.8375	0.438482	4	2	5	5	4	4	4	3	1	1	2
48	28	50	35	156	43.2	76	81	110	60	4.4	3.8	1.19	1.21	2.42	17.7515	0.938272	0.487179	5	2	5	5	5	4	4	2	1	3	2
35	32	27	28	168.2	50	77	83	100	60	3.8	2.6	0.53	1.24	1.16	17.6733	0.927711	0.457788	4	2	5	5	5	4	3	2	2	2	2
34	25	24	32	153.2	48.4	76	83.6	100	58	4.6	3.7	1.27	1.04	2.32	20.6219	0.909091	0.496084	4	2	5	5	4	5	3	2	1	1	1
44	35	51	43	147.1	49.2	79	87	100	78	4.8	4.8	0.79	1.39	3.24	22.7373	0.908046	0.53705	1	2	4	5	5	4	3	2	2	1	1
27	22	31	27	154.3	37.3	68	74.5	96	58	4.5	5.1	1.03	1.61	3.09	15.6667	0.912752	0.4407	4	2	5	5	4	4	4	3	1	1	1
40	34	33	29	159.8	52.6	77	87	120	70	4.4	6.1	1.44	1.42	4.29	20.5983	0.885057	0.481852	4	2	2	5	2	4	3	2	2	1	2
28	28	49	44	159	39.3	67.5	77.5	98	68	4.7	5	1.01	1.48	3.38	15.5453	0.870968	0.424528	1	2	3	3	4	4	3	2	2	2	2
43	35	44	35	156.6	42.8	75.5	85.5	106	60	4.8	3.4	0.9	1.29	1.71	17.4526	0.883041	0.48212	1	2	4	4	5	4	3	3	1	1	1
40	26	47	34	157.3	39.2	71	78.5	106	60	4.7	4.8	0.76	1.42	3.06	15.8427	0.904459	0.451367	4	2	5	5	5	4	3	2	2	2	2
30		32	29	154.3	48.9	74	85	96	60	4.8	5.5	0.76	2.02	3.47	20.5389	0.870588	0.479585	4	2	5	5	5	4	5	3	3	1	1
42	37	48	44	141.1	41.7	74	80.7	90	58	4.3	4.2	1.39	1.1	2.65	20.9451	0.916976	0.524451	4	2	5	5	4	4	3	2	2	1	1
38	31	51	35	159.3	48.6	71.5	84	100	58	4.6	4.6	1.32	1.38	3.07	19.1516	0.85119	0.448839	4	2	5	5	5	4	4	2	2	1	1
21	23	51	45	151.4	46	77	84.7	98	60	4.3	3.4	0.61	1.06	2.22	20.0681	0.909091	0.508587	4	2	3	4	5	5	3	3	2	2	2
40	36	39	33	152.4	60.1	81	91.9	98	68	4.3	4.8	0.84	1.47	3.19	25.8764	0.881393	0.531496	4	2	4	4	4	4	4	3	3	2	2
31	37	37	37	161.4	43	74	81.7	110	84	4.8	5.5	0.97	1.59	3.66	16.5067	0.905753	0.458488	4	2	5	5	4	3	2	2	1	1	2
44	34	28	28	163.5	45.5	74	84	104	60	5.1	4	0.99	1.42	2.43	17.0206	0.880952	0.452599	3	2	4	4	5	5	4	3	1	3	2
	30	26	29	169	56.9	66	84	104	62	4.7	3.7	0.38	1.76	1.74	19.9223	0.785714	0.390533	4	1	3	3	4	5	3	2	2	4	4
41		33	29	168	52.1	59	80.5	104	60						18.4595	0.732919	0.35119	4	2	4	5	4	4	4	2	1	2	2
42	36	42	36	153	47.3	74	82	102	64	4.3	3.3	0.63	1.23	1.9	20.2059	0.902439	0.48366	4	2	5	5	4	4	3	3	1	2	2
46	31	50	27	166	60.1	70	86.5	124	78	5.4	4	0.42	1.24	2.72	21.8101	0.809249	0.421687	5	1	1	5	5	5	1	2	1	2	2
45	35	45	39	164.2	68.2	88	93	116	78	4.8	4.8	2.2	1.1	3.3	25.2952	0.946237	0.535932	4	1	4	5	5	6	3	1	1	1	4
30	36	35	23	162	58	64	81	120	60	4.9	4.2	0.71	1.55	2.8	22.1003	0.790123	0.395062	3	1	2	4	6	6	3	3	1	2	3
33	26	49	35	161.8	45.9	76	85.8	104	60	4.4	4.3	0.55	1.84	2.33	17.533	0.885781	0.469716	4	1	5	5	6	6	4	3	3	1	2
27	33	37	36	162	46.8	75	83	102	60	4.5	2.8	0.47	1.41	1.34	17.8326	0.903614	0.462963	4	1	3	5	6	5	5	2	3	2	2
28	30	35	29	160	43	71	80	110	68	4.9	4.7	1.2	1.91	2.48	16.7969	0.8875	0.44375	4	2	2	4	4	5	3	3	1	3	3
21	23	33	29	156.8	43.8	74.8	82	98	58	4.8	4.5	0.82	1.64	2.59	17.8148	0.912195	0.477041	4	2	4	5	4	4	3	2	1	2	3
	35	38	35	161.8	45.3	70	82.5	90	58	4.4	5	0.92	1.29	3.44	17.3038	0.848485	0.432633	5	2	4	4	5	4	3	2	1	1	2
28	35	50	35	160	40.1	57	73	90	58	4.8	3.5	0.78	1.4	2.11	15.6641	0.780822	0.35625	5	2	5	5	5	4	5	3	1	2	4
27	29	44	40	152.6	39.1	74.7	79	110	60	4.9	3.6	0.73	1.49	1.96	16.7907	0.94557	0.489515	3	1	3	5	6	6	3	2	1	3	4
47		42	34	173.8	83.1	88	100.2	120	60	5.3	4.2	1.05	1.25	2.78	27.5107	0.878244	0.506329	5	1	5	5	6	6	3	3	2	2	1
38	35	48	39	160.2	50	65	81	104	60	4.6	4	0.4	1.62	2.16	19.4825	0.802469	0.405743	3	1	5	5	4	6	4	2	2	3	1
42	26	40	27	159.7	47.8	77	85.8	102	78	4.4	3.5	0.42	1.41	2.02	18.7421	0.897436	0.482154	1	2	4	5	5	4	3	2	1	2	2
26	23	37	29	152.3	51.6	75.5	82	108	60	4.7	4.3	0.8	1.13	3.09	22.2459	0.920732	0.495732	4	1	2	3	6	6	3	2	3	2	2
30	28	36	34	165.5	47.3	60	81	104	64	5.4	4.3	1.19	1.35	2.92	17.2689	0.740741	0.362538	1	2	4	4	4	4	3	2	2	2	2
43	32	50	35	150	55.5	83.6	94.5	104	70	4.6	4.5	0.95	1.45	2.97	24.6667	0.884656	0.557333	1	2	3	4	4	4	3	2	3	2	2
	36	48	40	157.3	42.8	73.7	79	108	62	4.5	4.4	1.29	1.15	3.01	17.2976	0.932911	0.468531	3	2	3	5	4	4	3	2	1	1	1
26	26	41	35	151	39.2	70	77	98	60	4.6	4	1.09	1.46	2.24	17.1922	0.909091	0.463576	4	1	2	5	4	4	4	3	1	2	2
25	31	40	27	162.6	43.7	60	75	104	70	5.2	3.8	0.59	1.55	2.09	16.5288	0.8	0.369004	4	2	5	5	4	4	3	3	1	2	2
49	46	52	40	151.2	34.2	52	70	98	58	4.8	3.7	0.43	1.12	2.57	14.9597	0.742857	0.343915	4	1	2	5	4	4	3	3	2	1	2
27	32	45	36	163.3	49.5	64	81	90	60	5.2	3.3	0.69	1.47	2.16	18.5623	0.790123	0.391917	5	1	3	3	5	6	3	2	1	2	3
25	32	35	45	170.2	50.8	67	79	108	72	4.9	3.2	0.48	1.52	1.61	17.5366	0.848101	0.393655	5	1	5	5	5	6	5	2	1	4	1
48	35	47	35	170.3	55	65	82	110	70	5.4	4	0.57	1.1	2.77	18.9642	0.792683	0.381679	2	2	5	5	4	4	3	3	1	1	1
31	28	42	32	162.5	44.1	57	76	104	68	5.2	3.6	0.94	1.18	2.17	16.7006	0.75	0.350769	4	1	5	5	5	4	4	3	2	3	2
49	35	31	28	168.6	49.4	62	80	108	70	4.1	3.9	1.38	1.31	2.37	17.3785	0.775	0.367734	5	2	5	3	4	5	3	2	2	2	2
29	27	41	48	162.7	46.9	63	80	100	68	5.6	3.1	1.08	1.08	1.74	17.7173	0.7875	0.387216	5	1	5	5	4	5	3	2	1	3	2
27	32	33	28	159.6	41.4	73	77	104	60	4.3	4.4	0.85	1.93	2.08	16.253	0.948052	0.457393	3	2	3	5	4	4	3	2	1	2	1
47	37	51	39	170.5	59.5	67	87.5	100	68	5.2	3.9	0.54	1.64	2.12	20.4677	0.765714	0.392962	5	2	4	3	4	5	3	3	2	2	1
46	38	44	37	154	47.6	77	87	110	68	4.5	4.7	0.75	1.47	2.98	20.0708	0.885057	0.5	3	2	4	4	4	4	4	2	3	2	2
35	46	37	33	155.8	47.9	74	85	100	60	4.3	3.7	0.69	1.22	2.4	19.7333	0.870588	0.474968	1	2	5	5	4	4	3	2	1	1	2
30	35	36	35	161.1	43	73	80.4	100	60	4.5	5.2	0.83	1.59	3.49	16.5683	0.90796	0.453135	4	2	5	5	5	5	3	3	1	1	1
33	35	30	28	162.5	48.9	79	85.5	108	60	4.9	4.1	0.7	1.81	2.11	18.5183	0.923977	0.486154	5	1	2	5	4	5	3	3	1	2	2
30	27	33	24	168.3	53.8	79.7	88	108	70	4.2	3.6	1.06	1.35	1.89	18.9939	0.905682	0.473559	1	2	4	5	5	5	3	2	1	1	1
38	25	50	35	162.8	44.4	72.8	80.7	102	60	4.3	3.8	0.65	1.32	2.33	16.7523	0.902107	0.447174	3	2	4	4	4	4	3	2	3	3	1
31	35	49	35	161.5	36.6	54	72	100	60	4.7	4.1	0.82	1.53	2.28	14.0325	0.75	0.334365	4	2	3	5	4	5	3	3	2	4	3
27	25	24	28	154	43.8	70	82	102	60	4.4	5.8	0.73	1.88	3.81	18.4685	0.853659	0.454545	4	2	5	5	6	6	5	3	1	2	2
44	35	34	32	165.5	51.9	67	83	110	60	4.9	5	0.99	1.66	3.46	18.9483	0.807229	0.404834	2	1	4	4	5	4	3	2	3	4	2
24	22	44	35	158	37.3	56	70	100	68	4.8	3.8	0.81	1.45	2.24	14.9415	0.8	0.35443	5	2	5	5	4	4	3	2	2	3	3
49	35	45	45	168	50	79	86	110	68	5.1	4.3	1.13	1.23	2.76	17.7154	0.918605	0.470238	3	1	4	4	5	5	3	2	2	1	4
27	35	30	33	161.6	58.1	81	87	100	60	4.1	3.2	0.68	1.02	2.17	22.2481	0.931034	0.501238	5	1	3	3	5	3	4	3	1	3	2
22	26	26	29	178.5	62.8	66	88	110	60	5	3.9	0.79	1.69	2.03	19.7098	0.75	0.369748	5	2	5	5	5	4	4	2	1	4	2
28	38	50	35	164.8	52.9	67	83	100	50	4.4	3.2	0.86	1.15	1.86	19.4779	0.807229	0.406553	5	1	5	5	6	5	3	1	1	3	2
41	35	37	27	169	52.4	62	83	100	78	4	3.3	0.27	1.33	0.73	18.3467	0.746988	0.366864	4	2	3	4	6	4	4	3	1	2	3
38	35	47	32	155	34.2	66	73.8	104	68	4.9	4.2	1.22	1.39	2.43	14.2352	0.894309	0.425806	3	2	5	5	6	5	4	3	1	2	3
48	33	50	45	165.8	54.6	64	85	110	84	4.6	3.2	0.94	0.99	2.36	19.862	0.752941	0.386007	5	1	5	5	6	6	3	2	2	4	4
35	35	59	35	167.2	50.4	64	80	104	68	4.9	4.3	1.17	1.03	2.88	18.0284	0.8	0.382775	4	1	2	3	5	4	5	2	2	2	4
43	34	39	23	159	43.8	58	74	104	68	5.1	4.1	0.61	1.24	3.06	17.3253	0.783784	0.36478	3	1	3	4	5	4	3	2	1	1	1
45	30	36	36	162.5	49.7	74	85	108	60	4.6	3.6	2.04	1.31	1.8	18.8213	0.870588	0.455385	4	2	4	4	5	4	4	3	3	1	1
44	35	50	36	146.4	45.4	73	85	104	60	4.7	5.1	1.64	1.29	3.43	21.1823	0.858824	0.498634	5	2	4	2	5	1	4	2	3	3	1
24	31	34	28	157.2	48.6	73.5	80	110	70	4.1	5.7	0.8	1.78	3.76	19.6667	0.91875	0.467557	4	1	2	5	3	4	3	2	1	1	2
49	26	42	35	152.3	35.9	69	72.7	80	40	3.3	4.2	0.54	1.87	2.12	15.4773	0.949106	0.453053	3	1	1	5	5	4	4	3	1	3	3
28	27	29	38	156	44.1	60	75	110	70	4.33	4.33	0.57	1.29	3.11	18.1213	0.8	0.384615	1	2	5	5	5	5	3	2	1	4	4
49	37	49	35	160.3	42.2	61	75	100	70	5.22	4.1	0.48	1.4	2.05	16.4227	0.813333	0.380536	4	2	5	5	4	4	2	3	1	2	2
32	26	26	33	179	77.4	83	101	120	80	4.07	3.16	0.97	1.36	3.11	24.1565	0.821782	0.463687	3	2	5	5	5	5	5	3	3	3	2
47	35	50	35	164.7	47.6	65	81	120	80	4.27	3.96	0.5	1.7	2.38	17.5477	0.802469	0.394657	3	1	3	3	5	4	3	3	1	2	2
34	22	31	31	167.5	46.4	62	82	120	78	4.65	4.21	0.5	1.55	2.95	16.5382	0.756098	0.370149	3	1	5	5	5	6	3	3	1	1	2
46	35	50	35	164	43.2	59	79	108	68	3.99	3.03	0.57	1.4	3.5	16.0619	0.746835	0.359756	4	2	5	5	4	4	3	3	3	2	1
37	29	52	35	169	53.9	64	81	110	80	4.3	5.13	0.54	1.39	2.56	18.8719	0.790123	0.378698	5	2	3	4	5	4	3	2	1	3	2
49	35	50	45	170.5	48.7	60	79	114	80	4.37	6.06	0.95	1.35	2.75	16.7525	0.759494	0.351906	5	1	5	5	4	4	1	2	1	4	1
48	35	45	38	169.8	55.2	66	86	100	60	5.37	5.13	0.45	1.05	1.61	19.1454	0.767442	0.388693	4	2	4	4	5	5	2	3	3	4	2
40	33	45	35	170.3	52.9	64	83	114	78	4.79	4.41	0.53	1.34	1.32	18.2401	0.771084	0.375807	4	2	4	4	5	4	4	3	1	4	1
45	40	49	35	169.5	49.2	65.5	81	104	70	4.92	4.62	0.65	1.4	2.07	17.1248	0.808642	0.386431	4	2	4	5	6	4	3	3	3	2	1
36	30	43	33	157.6	41.7	61	76	110	70	4.8	4.24	0.83	1.71	3.52	16.789	0.802632	0.387056	4	2	5	5	4	4	4	2	3	2	1
30	30	42	32	175	69.6	85	93	108	76	5.22	4.96	1.03	1.33	2.64	22.7265	0.913978	0.485714	4	1	2	4	5	4	3	3	3	3	4
26	22	37	34	170.3	51.6	62.5	81	116	80	3.76	5.39	1.04	1.91	3.11	17.7918	0.771605	0.366999	4	2	4	4	4	4	5	2	2	3	4
33	29	41	28	174	67.8	73	90	114	70	4.39	3.47	1.19	1.42	2.72	22.394	0.811111	0.41954	4	1	3	5	4	4	3	4	1	2	2
38	33	44	31	163.7	47.6	63	81	102	70	5.01	5.49	1.51	1.17	3.37	17.7627	0.777778	0.38485	5	2	5	5	4	5	3	3	1	2	1
48	35	37	44	164	54.5	64	83	114	70	4.33	4.97	0.63	1.68	2.77	20.2632	0.771084	0.390244	4	2	5	5	4	5	4	2	3	4	1
35	35	29	33	166.5	50.3	65	84.3	110	70	5.38	4.31	0.44	1.73	2.31	18.1443	0.771056	0.39039	3	2	5	5	4	4	4	2	1	1	2
49	35	43	35	169.7	76.6	84	96	104	70	4.83	4.61	0.85	0.99	2.41	26.599	0.875	0.494991	4	2	4	5	5	4	3	3	1	2	2
46	34	40	26	172.2	58.8	70	86	120	70	5.42	5.66	0.48	1.92	1.68	19.8295	0.813953	0.406504	5	1	4	5	5	4	5	2	1	3	2
48	35	49	41	160.2	39.4	56	73	86	64	4.19	3.95	1.71	1.41	3.6	15.3522	0.767123	0.349563	4	2	4	4	5	5	4	2	3	1	2
47	41	58	40	157	49.6	75	83.7	108	70	4.72	3.74	0.76	1.44	2.93	20.1225	0.896057	0.477707	1	2	1	2	5	4	4	2	4	1	2
30	25	25	25	151.3	43.3	74.5	81	106	68	5.17	4.66	1.06	1.16	2.62	18.9152	0.919753	0.492399	4	2	5	5	4	5	4	3	1	2	2
29	29	31	31	155.2	56	84	90.5	118	70	4.06	4.73	1.25	1.02	2.07	23.249	0.928177	0.541237	5	1	4	5	5	5	4	3	1	3	2
32	23	42	27	151.8	47.6	71	84	104	62	5.48	4.17	0.83	1.35	1.92	20.6568	0.845238	0.467721	4	2	4	4	4	4	3	3	3	3	2
30	45	47	45	151	45.8	74	82	104	70	4.59	5.37	0.72	1.45	2.28	20.0868	0.902439	0.490066	4	2	2	2	4	4	3	2	3	2	2
41	35	50	35	159	46.2	74	82	118	78	4.85	3.81	1.29	1.06	3.37	18.2746	0.902439	0.465409	1	2	3	3	4	4	3	2	3	2	2
35	37	45	41	156.3	52.6	78	85	110	82	4.3	4.55	1.07	1.56	2.2	21.5312	0.917647	0.49904	5	2	2	3	4	4	4	2	1	4	4
26	24	21	26	158.5	60.7	82	93.6	118	68	4.3	3.72	0.73	1.31	1.61	24.1618	0.876068	0.51735	4	2	4	5	5	5	3	3	3	2	1
38	37	43	29	154.4	56.1	83.5	90.5	108	70	4.2	3.33	0.6	1.51	3.08	23.5325	0.922652	0.540803	4	1	3	4	4	5	4	3	1	2	2
47	40	51	41	157.3	52.5	79.8	84	110	70	4.6	4	1.36	0.88	1.81	21.2179	0.95	0.507311	4	2	3	3	4	4	4	2	1	2	2
42	32	43	27	171.4	46.5	75.7	80.5	110	70	4.5	4.8	0.79	1.61	2.64	15.8282	0.940373	0.441657	5	1	2	5	4	4	3	3	2	2	2
29	25	30	24	164.6	61.9	88	96	110	70	4.4	5.1	0.63	1.47	2.05	22.8471	0.916667	0.534629	4	1	3	4	6	5	4	3	1	2	3
29	29	28	28	160.5	55.5	82	92.5	108	66	4.2	3.5	0.99	1.35	3.44	21.5448	0.886486	0.510903	4	1	2	2	4	5	3	2	3	2	2
38	27	38	30	160.7	53.2	76.5	84.5	106	70	3.9	5.3	0.57	1.76	3	20.6006	0.905325	0.476042	3	2	5	5	5	5	3	2	1	2	2
37	30	43	35	163.2	47.5	79	84	104	64	4.2	4.1	0.64	1.86	2.18	17.8342	0.940476	0.484069	4	1	4	5	4	4	3	3	1	1	2
		38	31							5.1	3.9							5	2	4	5	4	4	3	3	1	2	2
29	22	30	27	158.5	45.2	73	80	110	76	4.7	4.8	0.67	0.98	2.41	17.992	0.9125	0.460568	5	2	4	5	4	4	3	2	1	2	2
46	31	40	33	161.4	49.9	75	83	94	68	4.5	4.6	0.58	2.07	3.06	19.1555	0.903614	0.464684	5	1	2	4	5	5	3	2	2	2	2
		42	38	158.5	35.1	55	71	114	70	4.6	3.7	1.19	1.23	2.28	13.9717	0.774648	0.347003	4	2	5	5	5	4	3	3	1	2	3
41	35	42	32	154.1	45.9	71.5	82	102	64	4.8	4.7	0.46	1.53	2.05	19.3289	0.871951	0.463984	5	2	4	4	4	4	4	2	1	4	4
36	30	42	36	152	37.8	68	76.5	84	60	4.7	3.1	0.94	1.36	1.4	16.3608	0.888889	0.447368	1	2	4	5	4	4	3	2	1	2	2
43	49	49	50	152.6	52.5	75	89.7	110	70	4.3	4.6	0.76	2	2.38	22.545	0.83612	0.491481	5	1	5	5	6	5	4	2	1	3	3
40	36	41	36	164.2	51.3	76.6	85.5	120	70	4.7	4.3	0.9	1.88	2.18	19.027	0.895906	0.466504	5	1	5	5	5	6	3	2	1	1	2
31	28	36	29	155.4	40.5	68	80	110	70	4.8	3.5	0.82	1.33	1.89	16.7708	0.85	0.43758	1	2	5	5	4	4	2	2	1	2	3
29	20	25	23	160.8	44.6	73	83.7	96	70	4.6	4.9	0.94	1.44	3.13	17.249	0.872162	0.45398	1	2	4	5	5	4	2	2	1	2	4
29	33	36	26	147.8	40.7	67	78.5	108	60	3.7	3.6	0.87	1.19	2.21	18.6314	0.853503	0.453315	2	2	4	5	4	4	3	2	1	1	2
24	36	32	26	158.7	51.5	80	87.5	106	70	4.6	3.8	0.98	1.2	2.42	20.4481	0.914286	0.504096	5	2	5	5	3	5	3	2	1	2	1
24	20	27	27	160.6	46.4	73	84	100	60	4.2	3.7	0.77	1.59	2.04	17.9898	0.869048	0.454545	1	2	2	4	4	4	3	2	1	2	3
40	26	41	34	156.5	48.2	74	87.5	100	60	4.4	4	0.78	1.64	2.31	19.6797	0.845714	0.472843	5	1	2	5	5	5	3	2	1	3	1
39	41	43	38	151.4	44.4	73.5	83	98	65	4.4	5	0.62	1.4	3.52	19.3701	0.885542	0.485469	5	2	2	2	5	4	3	1	1	2	4
45	35	26	45	164.3	51.5	75	87	90	60	5.3	3.9	0.7	1.18	2.65	19.078	0.862069	0.456482	1	2	2	2	5	5	2	2	1	1	1
31	25	39	32	159.3	42	74	82	98	60	5	4	0.62	1.35	2.67	16.5508	0.902439	0.464532	5	1	4	4	5	5	3	2	1	2	3
35	29	35	34	160.5	42.4	74	82	114	70	4.8	3.9	0.58	1.32	2.49	16.4595	0.902439	0.461059	1	2	5	5	5	4	3	2	1	1	1
31	25	35	30	151	40	74	81	80	68	4	3.6	0.77	1.08	2.48	17.5431	0.91358	0.490066	4	2	2	4	3	4	4	2	1	2	2
29	24	28	31	149.2	46.4	70	86	108	64	4.5	5.9	1.03	1.94	3.75	20.844	0.813953	0.469169	2	2	3	3	5	5	3	2	1	1	1
48	32	28	33	155.8	71.5	86	101	112	72	4.2	5	1.95	1.4	3.18	29.4558	0.851485	0.55199	2	2	5	5	4	4	3	2	1	3	1
31	41	40	38	155	53	80.6	93	106	70	4.1	4.1	0.76	1.67	2.4	22.0604	0.866667	0.52	1	2	5	5	4	5	4	2	1	1	2
39	32	42	28	153.5	52.8	74.5	88	118	78	4.5	4.2	3	1.02	2.43	22.4087	0.846591	0.485342	5	2	4	4	3	5	3	2	3	2	1
42	44	42	33	145	36.3	67	76	110	60	4.7	4.6	0.7	1.37	3	17.2652	0.881579	0.462069	1	2	2	4	5	5	3	2	1	1	1
30	34	40	33	169	68.5	87	97	108	65	4.9	4.1	0.92	1.59	2.26	23.9838	0.896907	0.514793	5	2	4	5	5	3	3	2	1	2	2
44	41	39	39	152.5	51.5	71	90	114	76	4.7	4.2	1.25	1.54	2.56	22.1446	0.788889	0.465574	1	2	1	2	5	4	3	2	1	2	2
33	41	38	29	158.8	47.1	76	88.1	100	72	3.8	3.6	0.73	1.59	1.7	18.6776	0.862656	0.478589	1	2	4	4	4	3	2	2	1	2	1
33	33	33	30	168.3	85.1	98	105	120	80	5.6	4.6	2.27	0.81	3.08	30.0442	0.933333	0.582294	5	2	4	5	4	3	3	2	1	1	1
37	32	36	28	170.2	52.9	75	87	118	70	4.7	4	0.71	1.88	2.11	18.2615	0.862069	0.440658	5	1	5	5	6	6	4	2	1	1	2
44	44	47	35	151	42.7	72.8	83	100	60	4.3	4	1.13	1.59	2.24	18.7272	0.877108	0.482119	5	2	4	2	5	4	2	3	2	1	1
30	24	32	30	146.3	39.5	63	79.8	100	68	3.9	4	0.84	1.35	2.36	18.4548	0.789474	0.430622	2	2	5	4	4	2	4	2	1	3	2
39	38	44	33	164.3	68.3	91.7	108.1	106	80	4.2	4.4	0.67	1.1	3.32	25.3015	0.848289	0.558125	5	1	5	5	6	6	3	2	2	2	1
35	39	48	27	168	47.3	60	78	104	66	4.1	2.5	0.83	1.22	1.18	16.7588	0.769231	0.357143	4	2	5	5	6	6	4	3	1	2	1
48	34	49	46	166.6	42.4	59	74	86	62	4.9	3.9	0.73	1.29	2.53	15.2762	0.797297	0.354142	4	2	3	3	4	4	2	1	3	2	2
36	35	33	33	174.7	51	63	81	110	80	4	3.4	0.62	1.28	2.13	16.7103	0.777778	0.360618	1	2	5	5	5	3	3	2	1	2	2
31	24	36	27	167.3	77	87	96	110	68	4.6	4.2	0.91	1.43	2.6	27.5105	0.90625	0.520024	2	1	4	5	6	6	4	2	1	2	2
46	30	32	31	175	52.8	63	83	106	70	4.5	4	1.26	1.12	2.7	17.2408	0.759036	0.36	5	2	2	2	3	5	2	2	1	4	4
37	40	44	41	163	54.4	74	83	110	70	4.1	4.9	2.13	1.24	3.31	20.475	0.891566	0.453988	1	2	3	4	5	4	3	2	1	1	1
30	35	38	33	171.8	53.8	63	79	110	70	4.7	3.6	1.15	1.48	2	18.2279	0.797468	0.366705	5	1	3	3	6	6	3	2	1	2	2
29	35	33	38	169.5	45.3	59	78	100	68	4.4	2.7	0.49	1.24	1.49	15.7674	0.75641	0.348083	1	2	3	3	5	4	2	2	1	1	1
31	47	50	35	171.8	57.3	67	86	98	66	4.1	3	0.96	1.4	1.35	19.4137	0.77907	0.389988	5	2	4	4	6	4	3	2	1	4	1
42	31	40	28	169	48.5	61	79	92	60	5.2	3.6	1.88	1.07	2.04	16.9812	0.772152	0.360947	5	1	3	3	6	5	4	1	2	2	2
35	24	46	35	169.5	51.8	60	82	116	70	5.2	4.3	1.07	1.8	2.06	18.0298	0.731707	0.353982	5	1	3	5	6	5	3	2	2	2	1
27	26	28	23	170	51.4	63	82	110	80	4.8	4.2	0.69	1.77	2.28	17.7855	0.768293	0.370588	1	2	5	5	4	4	3	2	1	2	1
28	30	42	35	171.3	54.6	63	81	98	62	4.2	4.4	0.52	1.22	3.03	18.6071	0.777778	0.367776	1	2	4	3	4	4	3	2	1	4	2
34	30	47	35	170.3	51.9	62	82	102	70	4.3	4.8	0.85	1.7	2.82	17.8953	0.756098	0.364063	1	2	5	5	5	4	3	2	1	4	1
38	27	34	37	175.5	48.6	57	83	104	68	4.4	3	0.81	1.29	1.62	15.7791	0.686747	0.324786	5	2	5	5	4	6	3	2	1	1	2
23	38	22	35	176.5	54.2	65	84	90	60	4.5	4.2	1.1	1.88	2.31	17.3984	0.77381	0.368272	5	1	4	4	6	5	3	2	1	2	2
26	35	23	32	166.8	49.6	60	80	120	80	4.5	3.8	1.31	1.13	2.58	17.8275	0.75	0.359712	5	2	3	2	5	5	3	1	4	2	2
37	29	42	34	169	54.6	67	88	116	80	4.6	3.8	0.66	1.43	2.35	19.117	0.761364	0.39645	3	2	2	2	3	3	3	2	3	1	1
26	23	28	27	177	61.8	67	88	118	78	4.4	5.6	1.24	1.64	3.84	19.7261	0.761364	0.378531	5	2	3	5	4	4	4	2	1	2	2
31	22	37	27	172.2	58.5	70	87	160	76	4.2	4.8	0.85	1.88	2.7	19.7283	0.804598	0.406504	5	2	4	4	5	4	4	2	2	4	3
29	35	28	33	163.7	51.8	62	82	103	70	4.4	3.9	0.73	1.3	2.61	19.33	0.756098	0.378742	5	2	4	4	5	5	5	2	1	2	2
33	38	43	44	169.3	51	79.6	88	94	60	4.4	4.4	0.79	1.78	2.45	17.7933	0.904545	0.470171	5	1	5	4	6	5	4	2	2	2	1
39	35	40	43	156.4	43.4	71	86	110	70	4.1	3.5	0.73	1.11	2.42	17.7426	0.825581	0.453964	4	2	4	4	4	5	3	2	1	2	4
33	35	32	25	167	52.2	82	91	110	70	3.8	3.1	0.79	1.48	1.53	18.7171	0.901099	0.491018	1	2	5	5	4	4	3	2	1	1	2
39	42	36	27	155.6	44.8	75	84	108	65	4.3	4.7	1.33	1.4	2.9	18.5037	0.892857	0.482005	5	1	5	5	6	5	3	2	1	1	1
40	49	35	33	158.3	56.6	73.5	89.6	120	80	4.4	4.5	1.5	1.61	2.5	22.5868	0.820313	0.464308	1	2	1	1	5	3	2	2	1	1	2
49	41	49	33	160	48.7	76.6	85	100	76	4.4	3.6	0.79	1.38	2.08	19.0234	0.901176	0.47875	5	2	4	5	4	4	3	3	1	1	1
24	27	23	27	153.8	38.3	68.7	76	120	70	4.3	4.5	0.88	1.95	2.36	16.1915	0.903947	0.446684	5	2	5	5	6	6	5	2	1	2	4
38	24	50	35	156.7	45.9	70.7	85	110	70	4.3	3.3	0.89	1.18	1.83	18.6928	0.831765	0.451181	1	2	5	5	4	4	2	3	1	1	1
43	24	45	33	159.5	48.6	67.8	87.7	108	68	4.8	3.9	0.9	1.21	2.42	19.1036	0.77309	0.425078	3	1	5	5	5	4	3	2	1	1	2
35	25	27	25	161.3	47.1	73.9	83.6	90	68	4.4	4.4	0.7	1.18	3.25	18.1031	0.883971	0.458153	5	2	2	2	4	3	4	3	2	1	1
38	22	26	26	175.2	55.7	64	82	116	80	4.2	2.9	0.52	1.44	1.29	18.1463	0.780488	0.365297	2	2	4	4	4	4	3	2	1	4	3
33	27	37	33	158	50	77	89	90	60	4.4	3.9	1.03	1.38	2.32	20.0288	0.865169	0.487342	5	2	4	5	4	4	3	2	1	2	2
35	41	45	37	165.4	43	72.5	80	108	66	4.8	3.4	0.79	1.09	2.21	15.718	0.90625	0.438331	1	2	5	5	3	3	3	2	1	1	2
32	30	45	47	156.8	51.7	82	93.7	100	70	4.8	4.6	0.68	1.19	3.31	21.028	0.875133	0.522959	2	1	2	5	2	2	4	2	1	1	2
41	33	47	33	149	45.3	68	82	108	65	3.8	4.1	0.88	0.9	2.79	20.4045	0.829268	0.456376	1	2	5	5	4	4	3	2	1	2	3
39	28	41	37	153.1	42	73	83	120	70	4.4	3.1	1.26	1.04	1.87	17.9184	0.879518	0.476813	5	2	5	5	5	3	3	2	1	1	1
41	32	45	36	157.7	44.8	72.5	82	108	65	4.2	3.6	0.54	1.53	1.89	18.0142	0.884146	0.459734	5	1	5	5	3	4	3	2	1	1	1
45	31	46	40	165.7	48.3	78	87	120	70	4.8	4.1	1.06	1.62	2.05	17.5915	0.896552	0.47073	5	2	3	5	5	5	4	2	3	1	1
46		45	34	157	52.4	82	90	102	60	4.4	5.3	0.83	1.59	3.45	21.2585	0.911111	0.522293	1	2	4	5	4	4	3	2	1	3	4
	39	44	43	163	54	79	88.6	110	70	4.2	3.4	0.73	1.56	1.79	20.3244	0.891648	0.484663	2	2	4	5	4	4	3	2	1	1	2
	43	32	32	156.5	45.2	72.5	86.2	100	65	4.5	4.2	0.8	1.36	2.65	18.4548	0.841067	0.463259	1	1	5	5	5	4	3	2	1	1	1
42	43	39	35	160.8	58.2	81	93	110	68	4.4	4.7	0.86	1.31	3.42	22.5087	0.870968	0.503731	5	2	5	5	5	5	3	2	1	1	1
35	28	28	27	166.2	71.2	80	94	120	80	4.5	3	3	0.81	0.98	25.7761	0.851064	0.481348	3	1	4	5	3	4	3	3	1	1	2
32	32	30	26	174	67.8	75	93	110	70	4.1	4.1	1.48	1.46	2.41	22.394	0.806452	0.431034	2	2	5	5	6	5	2	2	1	3	2
37	26	29	29	160.5	46.4	63	79.9	114	70	4	5.9	1.22	2.02	3.36	18.0122	0.788486	0.392523	3	1	5	5	6	5	4	2	1	1	2
36	35	37	30	170.2	46.9	60	77	108	70	4.3	3.6	1.24	0.73	2.78	16.1903	0.779221	0.352526	4	1	5	5	6	6	3	2	2	1	1
	31	40	32					108	70									2	1	4	4	6	6	4	2	1	3	2
32	45	35	31	175.5	64	69	89	116	74	4.4	3	0.74	1.02	1.92	20.7791	0.775281	0.393162	5	1	3	5	6	5	3	2	2	2	2
24	23	26	29	167.6	57.7	66	84	108	76	3.9	4.9	0.91	1.11	3.8	20.5413	0.785714	0.393795	5	1	5	5	5	5	4	2	1	3	3
36	44	32	30	170.7	49.5	59	78.5	100	70	4.6	3.5	0.58	1.28	2.06	16.9878	0.751592	0.345636	4	2	3	3	4	4	2	1	1	3	2
32	26	31	27	172.7	54.6	63	83	110	70	4.5	4.3	0.72	1.82	2.34	18.3066	0.759036	0.364794	1	2	2	2	4	4	4	1	1	2	2
47	31	28	31	165	46.6	60	80	106	70	4.2	3.4	0.55	1.04	2.3	17.1166	0.75	0.363636	1	2	3	3	5	4	3	2	3	2	2
28	23	36	30	172	61.3	69	91	110	70	3.7	3.3	0.77	1.3	1.82	20.7207	0.758242	0.401163	3	1	4	5	6	6	4	2	1	2	2
35	27	45	33	165.8	61.1	69	91	108	70	4.4	4.5	0.66	1.2	3.04	22.2266	0.758242	0.416164	1	1	3	3	4	4	3	1	2	4	1
50	40	47	34	164	48.4	64	81	102	70	4.3	3.2	0.93	1.65	1.46	17.9952	0.790123	0.390244	1	2	2	2	5	4	3	2	1	2	2
40	35	28	24	160.8	49.2	65	77	90	60	3.9	4.1	1.06	1.15	2.91	19.028	0.844156	0.404229	5	2	4	4	3	3	2	1	1	2	1
	29	56	38	170	57.5	67	87	104	70	4	4	1.08	1.29	2.36	19.8962	0.770115	0.394118	4	2	4	5	5	2	3	2	1	2	1
	35	37	35	170.6	53.7	62	79.5	104	72	4.6	3.6	0.94	1.27	2.14	18.4508	0.779874	0.363423	5	1	5	5	5	5	3	2	1	2	4
25	27	31	29	151.4	35	66	74	110	70	4.3	4.7	0.46	1.79	2.67	15.2692	0.891892	0.435931	4	2	4	4	5	5	3	2	3	2	2
42	29	46	30	156.8	58.1	81	88	100	60	4.7	4.2	0.97	1.11	2.95	23.6311	0.920455	0.516582	5	1	3	5	4	5	3	2	1	1	1
33	28	30	29	166.5	52.9	81	82	120	70	4.6	3.1	0.67	1.17	2.36	19.0821	0.987805	0.486486	5	1	5	5	6	4	3	2	1	1	1
32	24	36	27	158	56.9	80.7	89.5	120	70	4.4	3.6	1.23	0.98	2.36	22.7928	0.901676	0.510759	5	2	5	5	5	3	4	1	1	2	2
34	32	35	28	157	48.2	79.7	88	116	70	5.5	4.3	1.31	1.1	1.45	19.5545	0.905682	0.507643	2	2	3	4	5	4	4	2	1	3	4
25	29	22	24	161	49.4	72	96	120	70	4.9	3	1.25	0.8	2.41	19.0579	0.75	0.447205	2	2	5	5	4	3	3	2	1	3	1
32	48	38	32	152.4	51	80.2	89	108	68	4.4	5.2	0.74	1.25	2.59	21.9584	0.901124	0.526247	4	2	2	5	5	4	3	2	1	1	3
26	26	22	23	163.3	42.9	73.8	82.7	98	68	4.8	3.4	0.61	1.29	1.17	16.0874	0.892382	0.451929	4	1	5	5	6	5	4	2	1	2	2
38	35	46	45	161	40.2	69	77.8	114	70	5.64	4.11	0.6	1.78	3.03	15.5087	0.886889	0.428571	1	2	4	5	5	2	4	2	1	1	1
44	41	45	49	158.5	48	78	89.6	120	70	4.73	4.66	1.07	1.4	4.25	19.1066	0.870536	0.492114	1	2	5	5	4	4	3	2	1	1	2
22	24	32	34	151.8	41.1	71.6	81.5	110	70	4.38	4.05	0.48	1.92	2.72	17.836	0.878528	0.471673	5	2	5	5	5	3	4	2	1	3	3
31	33	24	28	161.2	49.5	71.6	85.7	110	70	3.82	3.64	0.84	1.34	2.62	19.0491	0.835473	0.444169	4	2	5	5	5	6	5	2	1	2	4
45	33	47	41	153.8	46.8	77	85	110	64	4.46	4.78	0.91	1.62	2.62	19.7849	0.905882	0.50065	1	2	3	2	4	4	1	2	2	1	1
43	47	45	47	156.2	43.4	76	81.5	118	70	4.02	6.33	1.03	1.53	2.05	17.788	0.932515	0.486556	4	2	3	3	4	5	3	2	1	1	1
30	26	29	39	162	51.9	78	88.5	104	66	4.41	4.32	0.53	1.41	1.84	19.7759	0.881356	0.481481	1	2	3	3	5	4	3	2	2	2	4
33	32	37	32	154.7	43.5	75.5	82	110	70	4.83	4.73	1.1	1.7	3.24	18.1764	0.920732	0.488041	1	2	5	5	5	4	2	2	1	2	2
31	35	32	42	150	55.5	79.5	90	110	70	3.94	3.21	1.07	1.22	2.51	24.6667	0.883333	0.53	3	1	5	5	6	5	3	2	1	1	2
42		41	34	165.3	41.3	75	80.7	90	60	3.94	4.01	1.22	1.25	2.72	15.1149	0.929368	0.453721	2	2	4	4	5	5	4	2	2	2	1
	30	25	27	151.6	44	71.5	84.5	102	60	5	3.24	0.54	2.37	3.08	19.145	0.846154	0.471636	1	2	3	5	4	5	2	1	1	2	1
47	47	38	38	164	52.3	81.6	86.5	120	72	4.08	5.01	0.64	1.59	1.94	19.4453	0.943353	0.497561	5	2	5	5	4	4	4	1	1	2	2
46	39	61	50	155.1	43.8	73.8	81.7	98	60	4.82	4.22	0.65	1.26	1.79	18.2075	0.903305	0.475822	3	2	4	5	5	5	4	2	2	1	2
22	38	51	47	151.6	45.7	71.5	81	106	68	4.09	5.15	0.97	0.96	3.08	19.8846	0.882716	0.471636	4	2	1	4	5	4	3	2	1	3	3
47	43	49	49	162.7	44.2	72	82	90	62	4.1	4.44	1.24	1.07	2.95	16.6973	0.878049	0.442532	1	2	5	5	5	5	3	2	1	1	1
42	33	38	33	159.6	44.7	69.5	83.5	122	74	4.06	5.23	0.52	1.34	2.56	17.5486	0.832335	0.435464	1	2	3	5	5	6	3	2	1	1	2
	35	41	35	168	63	72.1	83.6	120	72	4.06	4.27	0.89	1.32	3.68	22.3214	0.86244	0.429167	5	2	3	3	5	5	4	2	1	1	2
32	20	30	24							4.4	4.48							4	1	5	5	6	5	3	2	1	1	1
21	35	26	21	154	38.7	57	73	106	64	4.85	4.7	0.83	1.91	2.02	16.3181	0.780822	0.37013	5	1	5	5	6	6	3	2	1	2	1
25	38	28	24	166	46.5	58	78	110	70	3.87	3.47	0.64	1.54	3.08	16.8747	0.74359	0.349398	4	2	5	5	4	4	3	2	1	2	2
37	35	49	34							4.3	4.79	0.78	1.46	2.9				4	1	4	3	6	6	3	2	1	3	1
37	26	32	32	184.4	62.1	68	87	110	70	5.02	4.48	0.53	1.39	2.62	18.2629	0.781609	0.368764	2	2	3	4	4	4	3	2	1	2	3
36	20	23	20	109.5	28	56	69	100	64	4.58	3.73	0.5	1.66	2.07	23.3523	0.811594	0.511416	4	2	5	5	5	5	3	1	1	1	1
25	23	29	28							5.33	4.36							2	2	3	3	4	3	3	2	2	2	3
27	36	26	28	166.8	63.5	75	87	110	70	4.54	4.74	0.61	1.71	1.61	22.8235	0.862069	0.44964	4	1	5	5	5	5	3	2	1	2	2
34	48	34	34							4.49	5.02							5	2	4	5	5	5	3	2	1	2	2
40	44	41	31	166.8	52.4	65	82	120	68	3.73	3.87	1.1	1.41	2.72	18.8339	0.792683	0.389688	1	2	4	5	5	5	2	2	1	2	3
49	39	38	35							5.03	4.44							4	1	5	5	5	5	3	2	1	3	2
35	34	35	27	175.5	54.3	66	82	120	80	3.72	3.99	0.9	1.39	3	17.6297	0.804878	0.376068	3	2	3	3	5	4	3	2	3	2	2
30	27	39	28	161.5	51.5	64	87	118	70	4.96	3.92	0.53	1.95	1.94	19.7452	0.735632	0.396285	4	1	4	4	6	5	3	2	1	3	3
41	35	38	35							3.96	5.11							5	2	4	4	3	3	4	2	1	4	4
38	35	43	39	166.7	43.5	59	78	86	60	4.12	3.84	1.33	1.31	2.28	15.6537	0.75641	0.353929	5	1	4	4	5	4	3	2	1	2	2
27	22	50	48	155.5	40	73.5	82.6	110	70	3.73	3.69	0.78	1.61	2.49	16.5424	0.889831	0.472669	2	2	5	5	5	4	3	2	1	1	2
34	25	45	30	167.5	51	70.5	72.6	106	70	4.02	2.32	0.55	1.38	2.87	18.1778	0.971074	0.420896	5	2	5	5	4	4	3	2	2	1	2
41	41	44	41	155	49	72.5	81.2	110	70	3.7	4.48	1.06	1.81	2.49	20.3954	0.892857	0.467742	1	2	4	5	4	4	3	2	2	1	1
47	31	44	42	153	46	71.2	82.6	110	70	4.04	3.68	0.57	1.52	3.5	19.6506	0.861985	0.465359	1	2	4	5	4	4	3	2	3	1	2
29	29	33	29	155	50	78.5	82	110	68	3.98	4.42	0.72	1.17	3.91	20.8117	0.957317	0.506452	1	2	3	3	4	5	2	2	1	2	2
31	40	36	34	159	45	70.5	72.6	90	60	3.74	4.78	0.64	1.14	2.69	17.7999	0.971074	0.443396	2	2	5	5	5	3	3	2	1	2	2
41	32	45	37	150	48	71.5	82.6	114	70	3.8	3.35	1.82	0.88	2.33	21.3333	0.865617	0.476667	4	2	4	5	4	3	3	2	1	2	2
24	24	28	24							4.11	4.29							5	2	2	3	5	2	4	2	1	2	3
36	23	37	29	154	53	72.6	81.6	120	76	3.82	4.33	0.55	1.7	2.51	22.3478	0.889706	0.471429	1	2	4	5	5	4	4	2	1	1	3
31	27	39	39	161.4	58.5	78	88.7	120	70	4.3	4.6	1.24	1.45	2.77	22.4568	0.879369	0.483271	1	2	5	5	4	3	3	2	1	1	1
30	35	47	30	152	48	74.5	81.6	106	68	4.4	5.5	0.57	1.46	2.25	20.7756	0.91299	0.490132	1	2	3	3	5	4	3	2	1	1	1
	35	42	28	165	50	67		120	78	4.1	4.1	0.61	1.51	1.84	18.3655		0.406061	5	2	5	5	3	4	3	1	3	2	2
47	34	37	41	163.2	48.2	79	85	110	65	4.2	3.9	1.1	1.41	2.72	18.097	0.929412	0.484069	1	2	3	3	4	4	3	2	1	2	3
40	36	34	34	155	43	73.5	82.6	110	72	4.6	4.7	0.64	1.54	3.08	17.898	0.889831	0.474194	1	2	5	5	5	3	2	2	1	1	2
44	36	51	49	160	42	73.5	82.6	110	68	4.9	5.7	0.78	1.46	2.9	16.4062	0.889831	0.459375	5	2	5	4	4	3	4	1	2	1	1
31	25	48	54							4.9	5.7							5	2	5	5	6	5	3	2	1	1	1
37	32	34	36	156	48	73.5	82.6	110	76	4.8	4.7	0.8	1.99	2.33	19.7239	0.889831	0.471154	1	2	5	5	4	5	2	2	3	2	3
34	47	46	23	162.1	52.9	77	91.5	110	70	4.6	4.2	0.43	1.41	2.23	20.1321	0.84153	0.475015	1	2	3	3	4	4	3	1	1	1	3
	35	33	33	157.5	47	73.5	82.6	120	70	4	4.9	2.02	0.8	2.18	18.9468	0.889831	0.466667	5	1	2	5	6	5	4	2	1	2	1
42	24	41	29	159	45	73.5	82.6	122	72	4.6	4	0.62	1.61	2.23	17.7999	0.889831	0.462264	1	2	5	5	5	4	3	2	1	1	1
47	39	47	35	159	45	71.5	71.6	108	68	4.2	4.3	0.37	1.67	1.58	17.7999	0.998603	0.449686	5	2	5	5	4	6	3	2	2	1	2
36	30	36	41	163	48	70	70	100	66	4.2	4.3	0.82	2	3.03	18.0662	1	0.429448	5	2	5	5	5	3	3	3	1	2	2
38	35	35	27	152	52	77.5	87.5	118	70	4.7	4.2	0.54	1.36	3	22.5069	0.885714	0.509868	3	2	3	4	1	4	3	2	1	2	2
	39	40	28	156	53.2	71.5	81	110	70	4.6	4.1	0.74	0.96	1.86	21.8606	0.882716	0.458333	5	2	3	3	5	3	3	2	3	1	3
42	26	41	39	165	50	71.5	81.6	110	70	4.3	2.7	1.07	1.37	3.26	18.3655	0.876225	0.433333	5	1	2	2	4	4	3	2	1	2	1
48	35	39	30	163	60	70.1	83.6	120	80	4.7	3.8	0.93	1.15	2.67	22.5827	0.838517	0.430061	3	2	3	3	5	6	2	2	1	2	2
41	35	43	40	154	44	70.5	72.6	96	64	4.6	4.1	0.45	1.5	2.85	18.5529	0.971074	0.457792	5	1	5	5	6	5	4	2	2	2	1
29	32	50	36	171.1	56.2	65	80.3	106	70	4.1	5.2	1.02	1.77	2.07	19.1971	0.809465	0.379895	5	2	3	4	6	5	2	2	1	2	2
22	23	31	32	170.2	49	60	76	112	70	4	6.1	0.95	1.51	2.77	16.9152	0.789474	0.352526	5	1	2	4	5	5	3	2	2	3	4
29	33	37	27							4.7	4.5							2	2	3	3	5	4	3	2	2	2	1
25	20	26	39							4.2	3.4							5	1	5	5	6	5	4	2	1	3	2
47	34	28	34	171.2	50.2	64	81	120	70	4.5	5.1	1	1.29	3.32	17.1276	0.790123	0.373832	1	2	4	4	1	4	2	2	1	2	2
39	32	26	35	172	52	65	83	110	70	4.4	3.5	0.54	1.59	2.18	17.5771	0.783133	0.377907	1	2	5	5	4	1	3	2	1	2	1
24	26	33	30	178.5	51.1	61	83	100	60	4.1	3.6	1.27	1.25	3.24	16.0378	0.73494	0.341737	2	2	5	5	5	3	3	2	2	2	2
42	44	33	37							4.7	4.3							1	2	2	3	4	4	3	2	2	1	2
39	35	42	38	181	60	70	72	110	70	4.1	4.5	0.79	1.35	2.62	18.3145	0.972222	0.38674	2	2	4	5	4	4	1	2	1	3	1
43	40	44	39	170.5	44.8	60	78	116	70	4.5	6	1.01	2.07	1.97	15.4109	0.769231	0.351906	5	1	5	5	6	5	3	2	1	2	2
23	20	32	26	175.2	56.2	66	85	120	80	4.1	4.4	0.75	1.26	3.19	18.3091	0.776471	0.376712	2	2	3	4	4	5	4	2	3	1	1
48	35	34	29	168	60.2	67	84	120	80	4.3	4.8	0.61	1.42	3	21.3294	0.797619	0.39881	5	1	4	4	6	5	3	2	3	3	3
43	43	38	33	168.2	57.6	68	84	120	70	4.2	4.1	0.32	1.51	0.96	20.3597	0.809524	0.404281	1	2	3	5	5	5	3	2	1	2	2
25	27	23	29	173.6	62.8	67	91	110	70	4	5.6	0.79	1.44	3.13	20.8382	0.736264	0.385945	1	2	5	5	5	3	1	2	3	3	1
31	25	36	28	168.5	61.2	71	88	118	72	4.7	4	0.89	1.2	3.24	21.5552	0.806818	0.421365	5	1	3	5	6	5	3	2	1	1	2
30	25	34	26	168.2	52	63	82	118	70	4.2	3.8	0.32	1.43	2.07	18.3802	0.768293	0.374554	2	2	5	5	4	5	2	2	2	2	1
21	23	35	31	171.5	53.6	64	83	120	80	3.7	3.6	1.33	1.65	2.41	18.2237	0.771084	0.373178	5	1	4	4	5	5	3	2	1	4	2
49	35	47	38	169.5	52	62.5	84	120	70	4.6	2.9	1	1.48	3.06	18.0994	0.744048	0.368732	5	2	5	5	4	2	3	2	2	3	1
32	24	43	31							4.2	4.4							5	1	5	5	6	4	3	2	2	2	1
40	35	50	35	173	60	68	83	118	70	4.4	3.7	1.12	0.95	2.62	20.0474	0.819277	0.393064	5	2	3	3	4	5	4	3	2	3	1
44	41	47	65	167	64	85	86	120	70	4.3	3.6	0.77	1.36	1.79	22.9481	0.988372	0.508982	3	1	4	4	5	5	3	2	2	4	4
26	21	24	27							4.8	5.3							5	1	4	5	6	5	4	3	1	3	3
37	26	41	32	165.5	50	70.5	72.6	110	70	4.4	3.3	0.77	1.52	2.95	18.2547	0.971074	0.425982	5	2	3	4	4	4	4	2	2	2	1
24	30	45	41							4.4	4.2							1	2	3	3	1	2	2	1	2	1	2
33	32	49	49	161	59.6	81	91	110	68	4.3	4	0.68	1.52	2.9	22.9929	0.89011	0.503106	3	2	3	3	5	4	5	2	1	1	1
24	23	27	23							4.6	5.9							1	2	3	5	4	2	3	2	1	3	3
41	43	43	40	169.5	52.3	65	82	90	60	3.77	4.61	0.52	1.31	2.77	18.2038	0.792683	0.383481	5	1	4	5	2	5	4	2	1	4	4
34	47	27	27	153.8	37.6	65	74.5	110	70	5.02	3.44	0.93	1.7	3.37	15.8955	0.872483	0.422627	4	2	5	5	5	5	3	2	1	1	3
42	35	44	35	162.4	45	70	82	110	70	3.91	5.8	0.5	1.53	3.63	17.0624	0.853659	0.431034	1	2	5	5	5	5	3	2	1	2	2
27	30	35	28	161.7	46.3	77	83	98	66	3.95	2.98	0.86	1.12	2.95	17.7077	0.927711	0.47619	5	1	5	5	6	6	4	2	2	1	2
	35	35	29							5.43	3.37							3	1	5	5	3	5	3	2	1	4	4
41	32	40	44	173	59.8	68	89.1	104	70	4.95	6.01	0.97	1.56	2.07	19.9806	0.763187	0.393064	2	2	5	5	4	5	4	2	3	2	2
24	27	33	31	154	44.5	70.7	83	100	60	4.49	4.9	0.61	1.12	3.11	18.7637	0.851807	0.459091	4	2	3	5	4	4	3	1	1	2	2
	20	50	35	175.5	62	65	85	102	60	4.41	5.17	0.88	1.42	2.43	20.1297	0.764706	0.37037	4	1	2	2	6	6	1	1	1	2	2
23		35	32							4.56	3.36							5	1	4	4	5	3	4	2	3	4	2
43	35	43	35	152	48	73.6	83.9	120	74	3.77	3.78	1.27	1.14	2.67	20.7756	0.877235	0.484211	1	2	2	2	4	4	2	2	1	1	2
41	37	34	31	157.7	45.7	74	84	108	66	4.74	4.94	0.66	1.44	3.16	18.3761	0.880952	0.469245	2	2	3	4	5	4	3	2	2	2	1
31	35	39	32	157.5	44.3	71	81.5	98	64	3.94	4.83	0.66	1.42	2.54	17.8584	0.871166	0.450794	4	2	5	5	5	5	4	2	1	2	1
34	32	40	36	161.5	63.4	87	94	106	60	4.15	3.61	0.67	1.28	2.28	24.3077	0.925532	0.5387	4	1	2	5	5	5	3	2	2	1	2
40	26	27	25	164	59.6	69	89	116	72	4.15	4.88	1.02	1.32	3.19	22.1594	0.775281	0.420732	2	1	4	3	5	3	2	1	1	4	4
36	27	36	29	160.7	49.3	73	84	116	60	3.75	5.82	0.42	1.76	2.2	19.0904	0.869048	0.454263	2	2	5	5	4	4	3	2	1	2	3
48	35	30	27	152.2	40.4	69	78.6	108	60	4.56	3.86	0.67	2.17	3.78	17.4402	0.877863	0.453351	4	2	5	5	4	5	3	2	2	1	4
41	31	46	33	166	67.5	86	98	98	70	4.08	4.07	0.51	1.42	2.56	24.4956	0.877551	0.518072	5	2	3	4	5	5	4	1	2	1	1
40	41	40	36	164.4	74.8	94	101	104	70	4.95	4.95	0.29	1.28	1.27	27.6757	0.930693	0.571776	5	1	3	4	6	6	4	2	3	3	1
46	35	48	35							3.97	3.39							1	2	2	3	2	5	2	2	1	2	2
43	37	38	34	163.5	53.9	79	87	110	70	3.78	3.95	0.46	1.27	2.36	20.1629	0.908046	0.48318	2	2	5	5	5	4	2	2	1	2	2
39	26	48	31	157.7	47.8	74	85.5	110	70	4.25	4.87	0.75	1.68	2.56	19.2205	0.865497	0.469245	4	2	3	5	5	6	3	2	1	1	1
37	39	40	31	152.8	39.3	63	74.5	98	68	4.94	4.5	1.16	1.48	3.06	16.8324	0.845638	0.412304	4	1	5	5	5	5	3	2	1	2	2
24	22	25	23	156.4	49.3	78.8	88	100	64	4.54	5.67	0.79	1.35	2.62	20.1546	0.895455	0.503836	5	1	5	5	6	6	3	1	2	2	2
36	23	56	39	152.2	41.7	71.9	79.7	110	70	4.95	4.74	1.01	2.07	1.97	18.0014	0.902133	0.472405	5	2	5	5	5	5	4	2	1	2	1
24	32	34	28	161	50.4	72.7	88.6	90	60	4.77	2.78	0.75	1.26	3.19	19.4437	0.820542	0.451553	5	1	5	5	5	5	3	2	1	1	1
43	35	30	26	180	50.8	62	81	110	70	4.22	4.23	1.01	1.47	3.52	15.679	0.765432	0.344444	5	2	2	2	5	5	3	2	1	1	1
43	42	49	44	161	53.4	76.5	85.5	118	68	4.41	4.74	2.03	1.07	2.43	20.6011	0.894737	0.475155	2	2	5	5	5	4	3	2	2	2	2
42	32	59	41	166.3	51.6	79	89	110	70	4.81	5.14	0.69	1.36	2.75	18.658	0.88764	0.475045	4	2	4	4	4	5	3	2	1	1	2
33	27	38	26							3.74	3.39							3	1	5	5	6	6	4	3	1	2	1
31	31	30	32	151.7	45.6	77.7	86.8	110	70	4.86	4.7	0.54	1.38	2.56	19.815	0.895161	0.512195	1	2	4	4	4	4	2	1	2	3	1
42	35	32	33	169.8	55.8	66	84	120	78	5.43	3.84	2.43	1.03	1.99	19.3535	0.785714	0.388693	5	2	4	4	5	5	4	2	2	2	2
26	38	34	41	178.2	75.3	78	95	118	74	4.3	5.42	0.78	1.5	2.95	23.7126	0.821053	0.43771	2	1	2	4	5	5	2	2	2	3	4
40	36	44	44	164	57.7	82.8	92.4	120	70	4.26	3.42	0.54	1.51	1.48	21.453	0.896104	0.504878	5	2	4	5	4	4	3	1	1	2	3
41	35	39	39	160.2	50.3	75.5	85.6	110	70	4.5	5.21	0.59	2.06	2.64	19.5994	0.882009	0.471286	5	2	3	3	2	3	3	2	1	2	2
29	24	35	40	151.4	43.1	71	83	110	70	4.61	4.29	0.71	1.62	3.6	18.8029	0.855422	0.468956	5	2	5	5	6	6	4	1	1	2	2
45	47	54	43	154	50.5	71	88	120	74	4.4	4.22	0.69	1.33	3.21	21.2936	0.806818	0.461039	5	1	1	5	1	6	4	2	1	2	2
29	36	36	34	159.7	51.4	67	85	110	68	5.55	4.99	0.93	0.94	2.75	20.1536	0.788235	0.419537	4	1	3	3	6	5	3	2	1	2	2
21	25	32	38	158.3	54.8	81	92.5	110	72	4.36	5.01	0.78	1.39	2.41	21.8685	0.875676	0.511687	5	1	4	5	5	4	3	3	1	1	1
30	35	36	33	179	62	67	88	108	70	4.07	3.44	1.31	0.89	2.25	19.3502	0.761364	0.374302	5	2	2	5	5	5	4	2	1	3	1
39	32	38	32							4.1	5.57							2	2	4	5	5	4	1	3	1	4	3
42	35	38	32							4.67	3.9							5	2	2	5	4	4	5	2	2	2	3
30	37	27	35	165.8	78	83	99	120	80	4.3	4.5	2.85	1.3	2.7	28.3743	0.838384	0.500603	5	1	5	5	4	5	3	2	3	4	2
38	35	37	31	161.8	48.3	78	86	100	60	4.2	5.7	1.46	1.28	3.92	18.4497	0.906977	0.482077	5	2	5	5	4	4	5	2	2	1	4
38	42	37	34															2	2	5	5	4	4	3	2	2	2	2
44	36	37	40	164.2	53.7	77.6	89.6	90	70	4.4	4.2	1.05	1.43	2.67	19.9172	0.866071	0.472594	5	2	2	2	5	5	3	2	2	2	2
34	35	45	35	179.3	60.5	70	87	120	80	4.5	3.6	0.43	1.62	1.91	18.8189	0.804598	0.390407	3	1	4	4	6	6	4	2	1	1	3
39	28	49	37	159	41	74	80	104	60	4.2	3.3	0.47	1.41	1.79	16.2177	0.925	0.465409	2	2	2	3	4	4	4	2	1	1	1
40	49	38	32															5	2	1	5	1	5	3	2	2	2	2
	34	28	30															5	1	5	5	6	5	4	3	1	1	1
28	20	29	26	155.6	38.4	70	79	105	65	4.5	3.4	0.75	1.39	1.82	15.8603	0.886076	0.449871	1	2	3	5	2	4	3	2	1	2	2
30	23	39	26															1	2	5	5	4	3	2	2	1	1	2
	28	43	24															4	1	1	3	6	6	3	2	1	3	2
25	20	38	34	156.8	45.7	75.5	83	106	70	4.8	3.3	0.6	1.12	2.16	18.5876	0.909639	0.481505	5	1	5	5	5	5	3	2	1	2	3
	26	36	30															2	2	5	5	6	3	3	2	1	2	2
32	41	34	33	152.3	48.6	75	82.7	110	70	4.4	3.3	1.14	1.36	1.86	20.9525	0.906892	0.492449	5	2	4	4	5	4	3	2	2	2	3
26	24	41	37	167.8	54.4	82	90	90	60	4.1	2.9	0.83	0.9	1.74	19.3204	0.911111	0.488677	1	2	3	4	4	4	2	1	1	1	1
38	35	40	38	164	48.6	78.6	86	116	80	4.3	3.9	0.75	1.56	2.35	18.0696	0.913953	0.479268	1	2	2	5	4	4	2	2	1	1	1
48	39	50	37															5	1	4	4	5	4	3	2	1	1	2
35	31	44	37															5	2	5	5	6	5	3	2	1	1	2
32	38	50	47	161.5	54.4	76.8	88	108	68	4.5	4.5	1.07	1.24	2.97	20.8571	0.872727	0.475542	5	2	5	5	5	5	1	4	2	3	3
47	35	50	35															3	2	5	5	5	5	3	4	1	4	4
32	30	40	32	156.7	63.1	90	101	114	70	4.5	5.1	0.85	1.54	3.36	25.6975	0.891089	0.574346	2	2	4	4	3	2	2	1	1	1	1
22	41	40	23	166.7	55.7	82.5	92.6	104	60	4.6	4.7	0.7	1.46	3.32	20.044	0.890929	0.494901	1	2	5	5	5	5	3	2	1	1	1
23	26	33	44	156	49	76	88	110	70	4.3	5	1.65	1.17	3.45	20.1348	0.863636	0.487179	3	2	5	5	4	4	3	2	1	2	1
41	38	40	41	156.6	54.4	79	89	110	70	4.7	3.8	1.14	1.1	2.48	22.1827	0.88764	0.50447	1	2	2	5	5	4	3	2	1	2	1
33	21	34	33	158.7	45.4	76	83.5	110	70	4.8	3.9	0.5	1.62	2.14	18.0261	0.91018	0.478891	5	1	4	5	6	4	3	2	2	2	1
43	35	30	32	155.8	50.2	77	87	110	70	4.5	3.9	0.81	1.63	2.2	20.6809	0.885057	0.494223	2	2	4	4	5	5	1	1	3	2	1
	23	31	25	167.1	47.5	71	85	86	58	4.2	3.9	1.29	1.2	2.44	17.0114	0.835294	0.424895	1	2	4	4	2	5	3	2	1	1	1
29	32	29	34	154.4	42.2	63.5	81.5	110	70						17.7018	0.779141	0.411269	5	1	2	5	6	5	4	2	1	3	2
45	48	44	39	156	50.2	73.9	88.6	108	68	4.6	4	0.77	1.38	2.41	20.6279	0.834086	0.473718	3	1	4	4	6	5	3	1	1	2	1
34	35	51	35	170.5	61.3	72	87	100	64	4.5	4.8	1.47	3.01		21.0868	0.827586	0.422287	3	2	1	4	4	4	3	2	1	2	2
28	43	44	53	147.5	41.4	72	81.5	120	80	4.4	5.1	1.04	1.6	3.16	19.029	0.883436	0.488136	1	2	2	2	5	4	3	2	3	2	1
48	39	50	44	154.7	45.2	81	85.7	108	70	4.2	3.5	0.58	1.67	1.58	18.8868	0.945158	0.523594	3	2	4	3	3	5	3	2	1	2	2
41	35	48	40	160.2	47.9	77	82	100	60	3.9	5.3	0.82	1.58	3.27	18.6642	0.939024	0.480649	2	2	4	4	6	5	3	2	2	2	2
32	23	28	29	160.3	40	71	83	110	70	4.2	4.1	0.51	1.64	2.5	15.5666	0.855422	0.44292	5	2	4	5	4	2	2	2	1	1	1
48	37	47	37	178	71.7	77	93	90	68	5.1	3.9	0.82	1.43	2.25	22.6297	0.827957	0.432584	5	1	4	4	6	6	3	2	3	2	2
25	49	32	24	168.5	91.8	95	106	114	72	4.7	4.8	0.88	1.12	3.72	32.3328	0.896226	0.563798	5	1	5	5	6	6	3	2	2	2	4
40	36	27	26	166	54.5	65	82	110	70	4.5	4.6	1.18	1.23	3.17	19.7779	0.792683	0.391566	5	1	2	5	5	4	1	1	3	3	4
28	26	30	28	163	52.9	79	91	90	60	4.6	3.7	0.93	1.27	2.21	19.9104	0.868132	0.484663	1	2	4	4	3	3	3	2	1	2	2
29	28	22	22	170	54.3	80	90.7	104	72	4.8	4.7	0.9	2.12	2.11	18.7889	0.882029	0.470588	5	2	3	4	5	4	3	2	1	2	3
33	29	32	30	179.5	62	65	86	108	70						19.2426	0.755814	0.362117	1	2	5	5	5	5	3	2	1	2	2
38	28	52	41	154	45	72	83.5	108	66	4.4	3.6	0.99	1.15	2.2	18.9745	0.862275	0.467532	1	2	3	4	4	4	2	2	1	1	1
24	24	21	25	152	42	67.5	80	98	60	4.4	3.9	0.68	1.79	1.9	18.1787	0.84375	0.444079	5	1	5	5	5	3	3	2	1	1	4
	35	45	48	160				106	68									5	2	4	4	6	4	2	1	1	2	1
37	29	47	31	172	60	67	86	110	70	5.1	3	0.85	1.1	1.77	20.2812	0.77907	0.389535	2	2	4	4	5	5	3	2	2	3	2
31	26	37	31	163.5	58.2	80	97.5	118	70						21.7715	0.820513	0.489297	5	2	5	5	5	5	3	2	1	2	3
33	24	31	31	157	51.7	76	89	90	62	4.1	4.6	0.71	1.48	2.95	20.9745	0.853933	0.484076	5	1	4	4	4	3	3	2	2	1	4
31	32	38	30	164.8	53.4	81.6	89	110	70	4.6	3.9	1.18	1.4	2.16	19.662	0.916854	0.495146	3	2	3	3	5	4	3	2	1	1	3
	35	54	49	164.3	55	67	83	104	70	4.4	4.5	1.43	0.99	3.1	20.3745	0.807229	0.407791	3	2	3	4	4	3	3	2	1	3	4
34	35	29	27	183	65.3	69	90	110	70	5.5	4.3	1.09	1.44	2.77	19.4989	0.766667	0.377049	1	2	2	2	3	3	4	2	1	2	2
30	32	28	23	158.5	50.4	64	85	108	66						20.0619	0.752941	0.403785	1	2	4	4	5	4	3	2	1	2	3
39	23	42	29	161.5	49.2	62	80	108	70	5	3.5	0.84	1.12	2.22	18.8634	0.775	0.383901	5	1	2	5	5	5	3	2	2	4	4
32	29	22	30	153	55.3	72	91	98	68	4.06	3.63	1.23	1.45	3.06	23.6234	0.791209	0.470588	5	2	2	4	5	4	3	1	1	1	1
38	33	44	31	158	47	61	83	110	70	5.3	3.37	0.5	1.74	3.26	18.8271	0.73494	0.386076	2	2	2	4	5	5	2	1	1	1	1
43	24	47	38	175.5	54	60	81	110	70	4.16	3.72	0.53	1.52	2.49	17.5323	0.740741	0.34188	5	1	5	5	4	3	3	2	1	2	2
29	27	32	28	161	43.8	62	82	90	62	3.88	3.98	0.55	2.2	3.52	16.8975	0.756098	0.385093	3	2	3	4	5	4	4	2	1	1	2
32	30	34	33	150.5	43.8	57	80	110	70						19.3375	0.7125	0.378738	1	2	5	5	5	5	3	2	1	2	1
42	36	42	32	166.2	47.5	62	79.5	102	70	4.6	3.1	0.88	1.54	1.04	17.1962	0.779874	0.373045	2	2	2	3	3	3	2	2	2	2	4
33		26	25	157.7	41.2	71	80	90	62	5	4.9	0.8	2.06	2.65	16.5666	0.8875	0.450222	4	2	3	5	4	4	4	2	1	1	1
32	40	42	41	166	47.2	77.8	86	110	70	4.8	3.7	0.7	1.24	2.41	17.1288	0.904651	0.468675	1	2	2	5	3	5	3	2	3	2	1
	24	28	21	175.5	60	69	86	84	60	4.2	3.3	1.21	1.35	1.56	19.4804	0.802326	0.393162	1	2	5	5	1	6	2	2	1	3	4
35	35	42	30	146.7	39.7	69	81	100	64	4.8	3.2	0.73	0.93	2.23	18.4472	0.851852	0.470348	2	2	5	5	1	5	2	1	1	1	1
28	35	34	27	172.2	62.7	71	87	110	70						21.1447	0.816092	0.412311	5	2	5	5	5	5	5	2	1	4	4
39	35			161.6	49.8	76.5	86.5	90	62	4.5	3.4	0.71	1.22	2.02	19.0698	0.884393	0.473391	3	1	4	3	5	5	3	2	2	2	1
46	50	47	42	163.5	48.4	63	86	90	60						18.1055	0.732558	0.385321	1	2	5	5	4	4	3	1	1	2	2
29	30	36	33	161	56.1	82	93	120	70	4.6	3.1	0.77	1.28	1.76	21.6427	0.88172	0.509317	2	2	2	2	4	3	3	2	1	1	2
44	40	55	49	169	42.3	56	77	110	70	4.4	3.6	0.76	1.21	2.42	14.8104	0.727273	0.331361	5	2	2	3	2	4	3	1	2	1	1
37	40	38	35	153.5	48.8	73	86.5	100	66	5.5	4.3	1.33	1.44	2.58	20.7111	0.843931	0.47557	5	2	2	5	3	4	4	2	1	1	1
34	31	39	32	173	64.3	72	89	110	70	4.9	3	0.86	1.29	1.65	21.4842	0.808989	0.416185	5	1	5	5	5	4	3	2	1	3	3
42	37	52	41	161.1	45.1	73.9	83	98	70	4.4	5.2	1.28	1.52	3.43	17.3774	0.890361	0.458721	5	2	3	5	5	4	2	2	1	1	2
35	29	39	39	171	68.5	71	92	114	70	4.8	3.4	0.81	1.03	2.51	23.426	0.771739	0.415205	5	1	3	5	6	6	3	2	1	3	1
44	38	50	44	158.8	46.2	58	87	90	60	3.85	3.48	0.75	1.5	2.18	18.3207	0.666667	0.365239	3	1	4	5	6	5	3	2	1	1	1
49	31	41	40	166.3	43.7	64	81	78	60	4.82	4.1	0.83	1.06	2.05	15.8015	0.790123	0.384847	5	2	5	5	4	4	3	2	1	1	1
31	35	43	38	160	47.9	77	84.6	100	68	4.46	4.18	0.82	1.03	2.23	18.7109	0.910165	0.48125	2	2	4	5	4	4	3	2	2	2	2
34	28	33	30	154.3	41	67	79	106	70	4.6	3.58	0.71	1.01	3.08	17.2207	0.848101	0.434219	1	2	4	5	6	5	3	2	1	1	1
39	47	37	34	154	40.9	74	81	110	68	4.1	6.05	0.98	1.32	1.48	17.2457	0.91358	0.480519	1	2	5	5	4	3	3	2	1	1	2
31	35	29	26	173.5	59.5	70	89	110	70	4.12	4.88	0.56	1.84	1.42	19.766	0.786517	0.403458	5	2	5	5	5	5	3	2	1	2	1
42	32	43	35	160.2	50	64	84	110	70	4.52	3.95	0.71	1.21	2.62	19.4825	0.761905	0.399501	1	2	3	5	5	4	3	2	2	1	1
48	37	51	36	170.2	60	69	89	120	70	4.44	5.16	1.93	1.03	3.34	20.7125	0.775281	0.405405	5	1	5	5	3	4	2	1	2	1	1
47	35	44	35	167	65.4	81	90	120	74	4.17	3.97	0.52	1.72	3.24	23.4501	0.9	0.48503	5	2	3	4	6	5	1	2	1	4	2
42	30	30	32	159.2	46.1	72	82	108	66	4.04	4.36	0.92	1.35	2.28	18.1893	0.878049	0.452261	5	2	5	5	4	5	3	2	1	1	2
35	48	35	32	148	45.7	71	77	112	70	3.78	4.56	0.59	1.35	2.87	20.8638	0.922078	0.47973	1	2	5	5	4	4	2	2	1	2	1
	23	36	28	162	48	72	80.1	110	70	3.99	4.47	0.85	1.49	1.55	18.2899	0.898876	0.444444	1	2	3	5	4	4	4	2	1	2	2
39	35	40	34	170.5	57.2	65	84	120	70	4.23	3.73	1.19	0.93	1.74	19.6765	0.77381	0.381232	5	1	3	5	3	6	3	1	3	3	1
48		50	36	163.4	44.8	71.7	82	108	70	4.39	3.63	0.57	1.54	1.79	16.7793	0.87439	0.4388	5	2	1	5	5	5	3	2	1	1	1
32	27	31	37	167.8	49.5	65	83	110	70	5.43	4.31	0.6	2.25	2.51	17.5801	0.783133	0.387366	5	2	3	5	4	4	4	2	1	1	1
36	35	28	28	157.5	47.5	77	87	110	70	4.37	5.89	0.66	1.47	3	19.1484	0.885057	0.488889	1	2	5	5	5	4	3	2	1	2	2
30	21	34	28	170.5	55.5	64	82	116	70	4.53	4.29	0.83	1.44	2.67	19.0917	0.780488	0.375367	5	2	4	5	6	5	3	2	1	3	1
43	37	41	36	158.1	53.1	78.5	90.5	110	70	4.77	5.04	0.81	1.36	3.39	21.2437	0.867403	0.496521	1	2	5	5	5	5	2	1	1	1	2
39	39	37	37	174	47.1	60	77	110	70	4.61	4.25	0.79	2.12	2.23	15.5569	0.779221	0.344828	1	2	5	5	5	4	2	2	1	2	3
38	23	35	31	152.3	46.5	75	83.6	120	80	4.9	3.76	0.85	1.1	3.19	20.0472	0.897129	0.492449	1	2	2	1	5	1	3	2	3	1	1
44	29	49	33	155.2	41.2	71.7	83.2	110	70	5.17	4.88	0.66	1.39	2.2	17.1046	0.861779	0.461985	5	1	5	5	6	6	3	2	1	1	1
32	29	46	31	169.8	53.1	64	82	110	70	3.78	4.63	0.61	1.93	2.25	18.417	0.780488	0.376914	1	2	5	5	3	3	3	2	3	2	1
31	24	33	25	177	59.7	66	87	108	70	4.94	3.94	0.72	1.55	1.76	19.0558	0.758621	0.372881	1	2	3	3	5	4	3	2	1	1	1
38	23	28	33	176.5	61.8	68	87	108	78	4.83	4.76	1.43	1.31	1.63	19.8381	0.781609	0.385269	1	2	5	5	5	4	2	2	1	2	3
32	31	35	33	154.5	47.1	76.5	85.8	108	60	4.88	4.16	0.42	1.27	1.94	19.7317	0.891608	0.495146	4	2	2	3	5	2	4	1	1	1	1
27	33	31	28	157.2	48.3	78.5	85.5	114	70	3.86	4.99	0.6	1.6	1.63	19.5453	0.918129	0.499364	5	1	5	5	6	5	3	2	1	2	2
36	35	32	28	181	62.3	66	87	86	60	4.07	5.72	1.17	1.35	2.41	19.0165	0.758621	0.364641	5	1	5	5	5	6	3	2	1	3	2
48	39	49	49	172.2	55.7	67	85	120	80	4.95	4.5	0.58	1.84	2.64	18.784	0.788235	0.389082	1	2	5	5	4	4	2	2	3	1	2
48	33	40	34	156.3	40.8	65	79.5	110	60	3.95	4.65	0.55	1.26	2.12	16.701	0.81761	0.415867	1	2	5	5	5	4	3	2	1	2	2
31	27	40	34	172.5	78.4	85	96	120	74	4.87	4.09	0.55	1.5	2.1	26.3474	0.885417	0.492754	5	2	5	5	4	4	2	2	3	1	1
29	20	24	29	156.8	54.3	78	88	116	80	4.5	3.54	0.64	1.8	3.42	22.0855	0.886364	0.497449	4	2	5	3	4	4	3	2	1	1	1
	29	29	26	161.7	52.9	80	89.5	98	64	5.67	5.9	0.54	1.92	2.69	20.2319	0.893855	0.494743	5	2	5	5	3	3	3	2	1	2	2
23	31	28	33	184	61.4	67	87	120	80	4.74	4.92	0.72	1.94	3.34	18.1356	0.770115	0.36413	3	1	2	2	4	4	3	3	1	2	2
39	26	34	26	172.5	61.5	73	90	120	80	4.23	3.98	0.5	1.84	3.32	20.6679	0.811111	0.423188	5	1	3	2	5	5	3	1	1	2	4
30	35	27	23	165	50.7	79	88	100	64	4.74	3.94	0.62	1.54	2.33	18.6226	0.897727	0.478788	5	2	5	5	5	5	4	2	2	2	2
40	41	39	38	149.7	43.5	73	83	108	70	5.14	5.18	1.15	1.88	2.38	19.4109	0.879518	0.487642	1	2	1	1	5	5	3	2	1	2	2
45	43	40	38	171.2	63.5	73	87	104	80	4.7	3.09	0.59	1.94	2.95	21.6654	0.83908	0.426402	5	1	3	3	6	6	5	2	1	2	4
39	35	40	28	158	62.1	83.5	95.5	120	70	3.84	4.01	0.89	1.28	2.23	24.8758	0.874346	0.528481	5	1	5	5	6	6	4	2	1	2	3
47	40	51	43	153	46.4	74.6	84.8	114	70	5.42	4.49	0.72	1.29	3.08	19.8214	0.879717	0.487582	1	2	2	2	4	4	3	2	1	2	1
45	35	47	53	165.5	75	87	95	116	80	5.21	5.19	0.59	2.36	1.94	27.382	0.915789	0.52568	5	2	2	3	5	1	4	1	3	2	3
	43	37	41	169	47	71.7	82	104	70	4.29	5.22	1.06	1.61	3.42	16.456	0.87439	0.42426	4	2	5	5	4	4	3	2	1	1	1
31	35	36	32	149.5	39.8	65	75.5	104	64	4.3	4.6	2.27	1.49	2.44	17.8074	0.860927	0.434783	5	1	5	3	4	5	3	3	1	3	3
26	35	29	23	167	51.6	65	85.5	110	76	4.4	5.5	1.55	1.48	3.92	18.5019	0.760234	0.389222	5	1	5	5	5	4	5	2	1	4	3
46	36	49	36	152.7	36.2	55	73	104	60	4.1	4.1	0.86	1.72	2.31	15.525	0.753425	0.360183	5	2	4	4	4	2	3	2	2	2	1
28	35	33	24	161	56.9	78.2	87	100	60	4.2	3.9	1.82	1.25	2.31	21.9513	0.898851	0.485714	5	1	5	5	4	4	3	3	1	3	3
31	23	48	30	153	43.5	61	76	104	76	4.6	4.7	1.93	1.21	3.16	18.5826	0.802632	0.398693	5	1	1	4	1	6	3	2	2	1	1
34	32	32	29	159.5	36.2	53.5	72	98	60	4.9	5.7	1.28	2.03	3.29	14.2294	0.743056	0.335423	5	1	5	5	5	4	3	2	1	2	2
23	35	31	22	167.5	68.9	76	96	124	72	4.9	5.7	1.05	1.51	3.77	24.5578	0.791667	0.453731	5	1	5	5	5	5	3	2	3	3	3
	29	34	27	155.5	35.4	55	73.5	114	58	4.8	4.7	0.67	1.87	2.56	14.64	0.748299	0.353698	5	1	5	5	5	5	3	2	1	2	2
49	40	40	39	168	51.3	63.8	85	110	76	4.6	4.2	0.82	1.36	2.49	18.176	0.750588	0.379762	5	2	5	5	4	3	2	2	2	2	4
	26	37	32	157.3	45.6	58	77.5	110	72	4	4.9	1.26	1.68	2.93	18.4292	0.748387	0.368722	5	1	5	5	5	5	3	2	1	2	2
37	35	37	27	150	34.9	58.5	71.6	90	60	4.6	4	0.8	1.16	2.79	15.5111	0.817039	0.39	5	2	3	5	4	5	4	3	1	4	1
35	30	36	27	150.8	42.6	56.5	75.5	104	64	4.2	4.3	1.77	1.54	2.28	18.733	0.748344	0.374668	5	1	4	4	5	4	3	1	3	2	3
47	24	29	23	164.3	42.4	58	78.5	104	60	4.2	4.3	1.41	1.3	2.71	15.7069	0.738854	0.353013	5	1	4	4	5	5	3	2	1	2	3
44	26	45	31	144	26.6	52	66.3	96	58	4.7	4.2	2.01	1.05	2.78	12.8279	0.784314	0.361111	5	1	3	3	5	5	3	3	2	2	2
43	32	50	35	164	46.7	64	82	98	64	4.6	4.1	1.11	1.68	2.09	17.3632	0.780488	0.390244	5	1	5	5	5	5	4	3	1	3	2
32	33	46	29	157.1	38	56.5	77	100	76	4.3	2.7	0.95	1.2	1.19	15.3968	0.733766	0.359644	5	1	5	5	6	6	4	3	1	2	2
28	29	36	28	157	39	62.4	77.4	104	60	4.7	3.8	0.78	1.42	2.18	15.8221	0.806202	0.397452	5	1	5	4	4	4	4	3	1	2	3
41		39	29	158.2	39.2	58.1	76.8	110	68	4.6	4.1	1.43	1.44	2.3	15.6629	0.75651	0.367257	5	1	4	5	5	5	3	2	1	3	4
39	36	44	32	157	54.1	69.5	86.2	114	68	4.1	5.2	1.78	1.26	3.71	21.9482	0.806265	0.442675	5	1	5	5	5	5	3	3	1	3	4
45	35	36	23	170	83.7	93	103	120	80	4	6.1	1.42	1.45	4.42	28.9619	0.902913	0.547059	5	1	5	5	6	6	4	2	1	4	3
43	24	42	32	151.5	35.8	55	73.5	104	60	4.7	4.5	1.74	1.39	2.77	15.5976	0.748299	0.363036	5	1	5	5	4	5	3	2	1	2	3
32	38	33	30	152	48.6	63	83	104	72	4.2	3.4	1.03	1.22	1.93	21.0353	0.759036	0.414474	5	1	4	5	1	6	3	2	1	1	2
26	35	29	33	148	43.8	63.5	80	90	64	4.5	5.1	3.66	1.15	3.04	19.9963	0.79375	0.429054	5	1	5	5	4	4	3	2	1	2	2
39	29	32	33	147.5	36.9	57	76.5	98	68	4.4	3.5	1.17	1.47	1.99	16.9606	0.745098	0.386441	5	1	4	5	5	6	3	2	1	2	1
25	28	33	25	156.5	36.3	53	73.5	100	60	4.1	3.6	0.71	1.36	2.1	14.821	0.721088	0.338658	5	2	2	5	6	5	3	2	2	2	1
33	30	35	39	164	48.7	60	82	110	68	4.7	4.3	1.17	1.61	2.48	18.1068	0.731707	0.365854	5	2	3	5	4	5	2	2	1	2	3
42	36	33	40	158.7	37.9	55	78.5	110	72	4.1	4.5	1.1	1.78	2.39	15.0482	0.700637	0.346566	5	1	5	5	4	5	3	2	3	1	2
31	21	39	27	151.4	47.2	62	81	104	68	4.5	6	1.93	1.34	4.15	20.5916	0.765432	0.409511	5	1	5	5	4	5	3	2	1	2	2
36	35	38	33	152.2	45.9	58.5	80	104	60	4.1	4.4	0.87	1.19	3.05	19.8145	0.73125	0.384363	5	1	5	5	6	6	4	2	1	2	1
30	25	29	22	158.4	43.4	60	80	104	68	4.3	4.8	1.1	1.59	2.78	17.2973	0.75	0.378788	5	1	4	4	5	6	3	2	1	2	3
26	20	48	23	158	57.6	78	90	98	64	4.2	4.1	3.49	0.88	2.44	23.0732	0.866667	0.493671	5	1	5	5	6	5	3	3	1	4	2
29	24	36	25	153.5	41.8	58	84.5	98	60	4	5.6	1.72	1.15	3.83	17.7402	0.686391	0.37785	5	1	5	5	4	5	4	2	2	1	2
44	21	23	25	157.8	50.6	66	87.5	104	68	4.7	4	0.78	1.34	2.51	20.3206	0.754286	0.418251	5	1	5	5	6	5	3	3	1	2	2
31	26	30	26	151.7	38.3	59.5	76.5	90	64	4.2	3.8	1.25	1.16	2.48	16.6428	0.777778	0.392221	5	1	3	3	5	5	3	3	1	1	2
31	22	24	20	156	43.9	57	78.5	104	60	3.7	3.6	1.03	1.49	1.96	18.0391	0.726115	0.365385	5	1	4	4	5	4	3	3	1	2	2
	27	32	27	163.3	49.9	60.5	84	110	72	4.6	2.9	1.01	1.32	1.4	18.7123	0.720238	0.370484	5	1	4	5	4	5	3	2	2	2	2
38	38	38	30	158.5	46.8	65.2	83.2	120	68	4.2	4.4	0.59	2.07	2.54	18.6289	0.783654	0.411356	5	1	5	5	5	5	3	3	1	2	2
44	38	48	43	166.5	48.7	66	80	110	68	4.4	3.7	0.83	0.87	2.42	17.5671	0.825	0.396396	5	1	4	4	6	6	3	2	2	2	2
	30	37	31	151.5	35.4	57	72.5	98	60	4.3	3.6	0.87	1.22	2.1	15.4233	0.786207	0.376238	5	1	3	4	5	5	4	2	1	2	2
48	35	57	37	153.6	53.4	75.2	86	110	64	4.8	5.3	2.24	1.07	3.63	22.6339	0.874419	0.489583	5	1	3	4	6	6	4	2	2	4	4
	35	51	33	161	75.6	96.5	99	128	68	4.4	3.3	0.64	1.15	2.06	29.1655	0.974747	0.599379	5	1	4	5	5	4	4	3	1	3	2
37	26	46	35	157.3	53	72	88	120	72	4.4	4.2	1.87	1.66	1.99	21.4199	0.818182	0.457724	5	1	5	5	5	5	3	3	1	2	3
28	25	41	34	161.6	53.8	75	88.9	104	68	4.3	4	1.7	1.24	2.48	20.6015	0.843645	0.464109	5	1	2	5	4	3	3	2	1	2	2
29	30	31	28	151.7	39.8	58.5	79.5	96	60	4.6	5.9	1.98	1.23	4.66	17.2947	0.735849	0.38563	5	2	5	5	5	5	5	2	2	2	2
32	35	41	38	149	45.8	59	79	104	64	4.22	3.68	0.79	1.09	1.79	20.6297	0.746835	0.395973	5	2	5	5	5	4	4	3	1	4	2
33	28	41	34	160.6	52.5	71.5	86.4	110	64	4.99	5.03	0.67	1.49	1.5	20.3549	0.827546	0.445205	5	1	3	5	3	4	3	2	1	2	2
28	29	32	29	160.8	39.5	55	75.5	104	84	4.5	4.38	0.55	1.34	2.41	15.2765	0.728477	0.34204	5	1	3	3	5	3	3	2	2	3	3
30	22	33	24	162	47.6	61.5	82	104	60	4.2	4.04	0.97	1.27	3.06	18.1375	0.75	0.37963	5	2	3	3	5	4	5	3	1	2	2
	26	25	21	155	37	55	73.5	98	60	4.6	3.85	2.28	0.82	2.62	15.4006	0.748299	0.354839	4	1	5	5	5	5	3	2	1	2	3
39	39	41	41	170.5	54.7	68.8	87.8	104	64	4.4	5.09	0.35	1.3	2.15	18.8165	0.783599	0.403519	5	1	5	5	5	5	3	2	2	2	2
31	25	45	33	159	47.5	64	85	110	68	4.5	4.87	0.99	1.1	2.64	18.7888	0.752941	0.402516	5	1	5	5	4	4	3	3	1	2	1
39	37	41	43	167	54.7	68.6	89	104	64	4.1	5.77	0.93	1.46	2.98	19.6135	0.770787	0.410778	5	1	5	5	4	6	4	3	2	2	2
42	32	31	29	150.8	38.7	62.2	77	114	68	4.3	3.54	1.17	1.81	1.53	17.018	0.807792	0.412467	5	1	3	5	5	5	4	3	2	2	3
38	29	38	32	160.1	35.9	53	75	98	60	4.3	4.33	0.6	1.47	2.23	14.0059	0.706667	0.331043	5	1	5	5	5	4	3	3	1	2	2
27	26	39	24	155.7	42.7	57.5	78.5	104	64	4	3.56	0.61	1.49	1.76	17.6137	0.732484	0.3693	5	1	5	5	5	4	3	3	1	3	3
23	20	38	28	146	29.1	55.2	96.4	104	64	4.9	3.92	1.55	1.43	2.43	13.6517	0.572614	0.378082	5	1	4	4	5	5	5	3	1	2	2
41	35	41	34	164.5	65.4	71.5	91.5	120	68	4.3	5.95	1.08	1.27	2.95	24.1683	0.781421	0.43465	5	1	3	5	6	5	3	1	1	2	2
22	20	37	27	150.5	37.1	57	75	104	60	4.3	5.12	0.54	1.73	2.46	16.3795	0.76	0.378738	5	1	3	5	5	5	3	3	1	2	2
31	35	32	26	156	49	68.5	85.2	104	68	4.5	4.52	1.62	1.23	1.45	20.1348	0.803991	0.439103	5	1	5	5	6	5	3	3	1	4	3
36	33	43	36	155.2	45.5	63	81	104	58	4.4	4.98	1.17	1.7	2.93	18.8898	0.777778	0.405928	5	1	4	4	6	5	3	2	1	2	2
36	35	44	36	156.5	34.2	54	71.6	110	68	4.6	4.25	0.86	1.71	2.64	13.9636	0.75419	0.345048	5	1	3	3	5	5	3	3	1	4	1
25	23	30	29	166.5	60.6	72	84.5	104	60	4.8	3.75	1.76	1.19	2.59	21.8597	0.852071	0.432432	4	1	4	5	5	5	4	2	2	2	2
31	26	43	35	160	47.7	64	82.5	104	60	4.2	4.36	0.83	1.66	2.1	18.6328	0.775758	0.4	5	1	5	5	5	5	3	1	2	2	4
34	23	29	26	163	59.7	71	91	110	64	4.5	4.28	1.29	1.48	3.39	22.4698	0.78022	0.435583	5	1	4	4	5	5	3	2	2	2	2
41	28	36	34	161.2	43.3	62.2	77.8	110	72	4.6	5.29	0.86	2.24	2.02	16.6632	0.799486	0.385856	5	1	5	5	4	5	4	2	1	2	2
42	35	49	37	158.8	48.7	62.5	81.5	100	64	4.5	3.56	1.19	1.56	4.27	19.312	0.766871	0.393577	5	1	3	2	4	3	3	3	1	1	1
29	33	36	30	155.8	39.6	57	76.5	110	72	4.3	5.21	1.17	1.3	1.74	16.314	0.745098	0.365854	5	1	5	5	4	5	4	2	1	3	2
26	30	38	34	149.5	38.5	54	75.5	98	60	3.7	5.36	1.49	1.31	1.99	17.2258	0.715232	0.361204	5	2	5	5	5	5	4	2	1	3	4
25	32	38	35	164.5	59	70	88	110	68	4.1	5.7	0.81	1.53	1.84	21.8032	0.795455	0.425532	5	1	4	4	5	4	3	2	1	2	2
33	29	29	27	151	41.3	67	76.5	98	64	4.8	4.92	0.73	1.09	2.46	18.1132	0.875817	0.443709	5	1	5	5	4	3	4	3	1	4	4
32	31	33	32	166	56.7	71	89.8	96	60	4.5	3.98	0.5	1.2	2.25	20.5763	0.790646	0.427711	5	1	4	3	6	5	4	2	1	3	1
40	26	28	30	139.1	35	54	69	104	72	4.6	3.97	0.72	1.63	1.53	18.089	0.782609	0.38821	5	1	5	5	5	5	4	3	1	4	4
31	24	27	21	156.5	53.7	65	86	104	72	4.1	3.94	0.75	1.27	2.62	21.9253	0.755814	0.415335	5	1	4	4	6	5	4	3	1	4	3
39	28	30	32	159	41.8	59.5	78	104	68	4.2	4.59	2.36	0.64	1.55	16.5342	0.762821	0.374214	5	1	5	5	5	6	3	2	1	4	2
34	28	33	29	167.9	44	55	77	104	60	4.7	4.49	0.78	1.39	2.46	15.6081	0.714286	0.327576	5	2	3	3	4	4	5	3	1	3	4
43	31	34	34	157	54.2	74	87.8	104	64	4.4	4.69	1.01	1.33	2.64	21.9887	0.842825	0.471338	5	1	5	3	6	6	3	3	1	4	2
25	25	26	23	152.2	41.2	62	76	110	60	5.1	6.53	0.69	1.6	2.15	17.7856	0.815789	0.407359	5	1	5	5	4	5	3	3	1	3	3
29	23	37	26	162	48.8	64.5	82.5	104	68	4.1	3.06	0.74	1.02	1.61	18.5947	0.781818	0.398148	5	1	4	3	6	6	3	2	1	2	3
27	37	27	32	156.5	38	54	71	104	60	4.8	5.05	0.57	1.42	2.49	15.5151	0.760563	0.345048	5	1	5	5	5	5	3	3	2	4	2
29	21	29	30	152.5	39.6	59	78	104	72	4.5	3.91	0.91	1.94	2.62	17.0277	0.75641	0.386885	5	1	5	5	6	5	5	2	1	2	2
34	26	25	23	160.5	55.8	67	87	114	68	4.5	4.29	0.74	1.63	3.08	21.6613	0.770115	0.417445	5	1	5	5	6	6	4	3	1	3	4
20	20	25	21	163	50.5	68	85.2	110	72	4.4	4.97	1.01	1.01	2.54	19.0071	0.798122	0.417178	5	1	1	5	1	5	4	2	1	2	3
39	32	51	35	152.2	42.4	62.8	79	104	68	4.3	3.94	0.82	1.5	3.39	18.3036	0.794937	0.412615	5	1	4	4	5	5	3	2	2	3	4
26	23	28	28	156	38.6	59	75	100	68		3.83	1.47	2.12	2.33	15.8613	0.786667	0.378205	5	1	4	5	5	5	4	3	1	3	4
22	29	24	24	145.6	33.4	60.1	73.5	110	64	4	5.02	0.48	1.91	1.68	15.7552	0.817687	0.412775	5	1	5	5	4	4	4	3	1	4	4
21	30	26	24	158.2	43.9	58	77.5	110	72	4.7	4.44	0.41	1.46	1.89	17.5409	0.748387	0.366625	5	1	4	5	4	4	3	3	1	3	4
27	26	30	29	154.5	45.4	61	82.5	90	60	4.7	4.21	1.17	1.14	1.58	19.0195	0.739394	0.394822	5	2	5	5	4	4	4	3	1	2	2
34	45	39	35	157.1	38.5	55	74	140	60	4.8	4.91	1.45	0.93	2.62	15.5994	0.743243	0.350095	5	1	5	5	5	5	3	2	1	1	2
26	30	33	24	158.1	45.7	57	79.5	104	68	4.7	4.8	0.92	1.36	2.9	18.2832	0.716981	0.360531	5	1	5	5	5	5	4	2	1	2	4
26	26	36	32	158.7	39.5	52.5	75.5	98	68	5.1	5.06	0.89	1.45	2.18	15.6835	0.695364	0.330813	5	1	3	4	5	6	4	2	1	2	2
40	26	33	31	163	49.7	68.8	85	100	64	4.8	4.2	0.57	1.5	2.23	18.706	0.809412	0.422086	5	1	5	5	5	4	3	3	1	2	2
31	30	43	27	165	56.8	68	88	104	60	4	4.8	0.51	1.21	1.97	20.8632	0.772727	0.412121	5	1	4	5	4	4	3	3	1	2	2
42	33	43	35	170	56.6	67	86.7	110	72	4	4.7	0.76	1.07	2.31	19.5848	0.77278	0.394118	5	1	4	4	4	4	3	3	1	2	2
29	23	42	29	154.5	46.9	61	81	104	68	4.7	4.4	0.77	1.68	3.21	19.6479	0.753086	0.394822	5	1	5	5	4	5	3	2	2	1	2
33	27	32	31	153.3	46.3	63	80.5	114	64	4.9	4.9	1.23	1.45	3.06	19.7014	0.782609	0.410959	5	1	5	5	5	5	4	3	2	4	2
26	25	29	23	164.5	42.5	61.8	81.6	104	60	4.8	3.7	0.5	1.74	3.26	15.7057	0.757353	0.375684	5	1	5	5	5	6	3	2	1	3	2
35	26	44	43	150.3	40.4	55.5	78	104	60	4.5	4.3	1	1.73	3.29	17.8839	0.711538	0.369261	5	1	5	5	4	4	3	3	1	2	1
36	29	40	24	156.2	49.2	64	85	90	60	4.2	5.7	1.35	1.09	3.89	20.1652	0.752941	0.409731	5	1	2	4	6	4	3	2	3	3	4
		38	39	158.6	48.1	64.5	82.5	90	60	4.4	4.2	0.49	1.77	1.84	19.1222	0.781818	0.406683	5	2	3	5	5	5	5	2	1	2	2
45	35	50	56	171.5	60.1	70.6	92.4	110	64	4.4	4.7	0.65	1.41	2.23	20.4337	0.764069	0.411662	5	1	3	4	5	6	3	2	1	2	2
40	27	38	31							4.1	4.8							5	1	1	4	1	5	3	2	2	2	1
30	30	35	35	152	38.4	58	75	104	60		4.47	0.62	1.82	2.75	16.6205	0.773333	0.381579	5	1	1	2	5	4	3	2	1	2	3
40	29	36	33	169.5	57.5	72.5	91.8	96	60	4.2	3.5	0.81	1.76	2.05	20.0137	0.78976	0.427729	5	1	2	4	6	5	3	2	1	3	2
48	32	48	45	156.2	35.4	52	74	104	68	3.7	4	0.93	1.79	2.43	14.5091	0.702703	0.332907	5	1	4	2	4	4	2	2	2	1	4
		50	35	172.5	71.9	77	102.2	128	72	4.3	4.3	0.68	1.43	2.1	24.163	0.753425	0.446377	5	1	4	2	4	5	4	2	3	3	2
41	36	45	34	157	40.3	59	71.5	104	60	4.3	3.7	0.85	1.66	1.37	16.3495	0.825175	0.375796	5	2	5	5	3	5	3	2	1	1	1
29	27	35	21	153.6	42.2	60.8	79	98	60	4.8	4.4	1.31	1.5	2.41	17.8867	0.76962	0.395833	5	1	5	5	5	5	5	2	1	2	2
31	35	33	30	152.5	44.1	63	81	110	68	4.3	4	1.34	1.03	2.02	18.9626	0.777778	0.413115	5	2	5	5	5	5	3	2	1	1	2
	26	45	36	147.5	29.8	57	67.5	98	64	4.9	4.5	0.47	2.01	2.59	13.6972	0.844444	0.386441	5	1	4	4	5	5	3	3	3	4	3
34	21	50	35	150	33.9	56	71	90	58		4.03	0.52	1.63	2.15	15.0667	0.788732	0.373333	5	1	5	5	4	4	4	2	1	3	2
42	26	35	23	152.5	39.2	56.5	76.5	90	60	4.9	3.6	0.5	1.97	1.99	16.8557	0.738562	0.370492	5	1	5	5	4	5	3	2	1	2	2
25	21	34	28	163.5	49.5	67.8	85.2	110	64	3.9	4.2	1.02	1.11	2.77	18.517	0.795775	0.414679	5	1	5	5	5	3	3	3	2	4	3
39	31	42	33	135.6	27.6	55.4	67.8	90	60	4.3	3.9	0.94	1.79	2.72	15.0103	0.817109	0.408555	5	1	4	4	5	5	2	2	1	1	1
38	37	35	41	161	42.9	58	77.5	104	60	4.7	4.9	2.02	1.18	4.22	16.5503	0.748387	0.360248	3	1	5	1	5	1	5	3	1	2	2
42	35	41	30	161.2	45	56.5	79	104	64	4.3	5.4	0.75	1.3	3.29	17.3174	0.71519	0.350496	5	1	4	5	5	6	3	3	1	2	3
34	22	37	24	161.1	43.2	55.5	78	120	68	5.3	3.6	0.72	1.04	2.23	16.6453	0.711538	0.344507	5	1	5	5	5	4	3	3	2	1	2
29	23	27	24	159.3	52.8	71.5	85	100	68	4.1	4.5	1.45	1.27	2.51	20.8067	0.841176	0.448839	5	1	5	5	5	4	3	1	2	4	4
	38	29	23	168	58.4	72	93.5	98	60	4.3	3.7	1.17	1.82	2.75	20.6916	0.770053	0.428571	5	1	5	5	6	6	3	3	1	2	3
40	28	50	43	157.8	37.2	55	76	104	72	4.3	4.5	0.76	1.92	2.05	14.9393	0.723684	0.348542	5	1	3	3	5	5	3	2	1	1	2
29	23	33	26	148	43.7	65	84.5	104	64	4.2	5.2	0.52	1.57	1.89	19.9507	0.769231	0.439189	5	1	5	5	4	4	3	2	1	2	4
40	30	32	28	169	81.2	96	101	104	68	4.7	4.9	0.71	1.54	4.33	28.4304	0.950495	0.568047	5	1	5	5	5	5	2	3	1	1	1
38	25	41	26	162.1	51.4	66.5	80	110	68	4.5	3.8	0.89	1.77	1.94	19.5613	0.83125	0.410241	5	1	4	4	5	4	4	2	2	4	4
34	22	35	25	162.8	62.5	80	92.5	110	68	5.01	4.65	1.24	1.4	2.46	23.5815	0.864865	0.4914	5	1	4	5	6	4	4	2	3	2	4
44	29	46	38	153.8	39.6	57	77.5	104	76	5.57	3.99	0.73	1.07	2.38	16.741	0.735484	0.370611	5	2	5	1	3	1	2	3	1	3	2
36	28	29	30	166	43.4	62.4	80	110	64	3.9	3.67	1.17	1.43	1.71	15.7497	0.78	0.375904	5	1	5	5	5	5	3	2	3	3	2
	27	47	35	146	36.7	57.2	74.1	100	54	3.72	6.49	1	1.66	3.16	17.2171	0.77193	0.391781	5	1	5	5	5	5	3	2	1	3	1
37	30	49	30	167.5	53.3	62.8	86.8	104	64	3.98	4.3	0.63	1.61	2.12	18.9976	0.723502	0.374925	5	2	4	4	5	5	3	2	1	2	2
39	21	32	31	174.3	49.2	58	85	110	60	4.1	4.37	0.58	1.46	1.92	16.1946	0.682353	0.33276	5	1	4	4	5	5	3	2	1	2	2
40	35	52	37	162.5	44.6	57	81	104	68	4.18	5.37	0.5	1.62	1.45	16.8899	0.703704	0.350769	5	1	4	5	5	4	4	3	1	4	3
32	25	42	23	155.8	38	54.5	75	110	72	4.88	3.39	0.74	1.63	2.8	15.6548	0.726667	0.349807	5	2	5	5	4	4	4	2	1	1	1
41	22	34	29	157.7	57.1	77.4	90	104	64	3.95	3.57	1.76	0.87	2.98	22.96	0.86	0.490805	5	1	5	5	5	5	4	3	1	4	4
35	31	45	32	160.5	65.6	79.6	97	114	68	5.16	3.32	1.18	1.1	2.93	25.4656	0.820619	0.49595	5	1	3	4	5	4	4	2	3	3	3
27	28	44	35	178.6	66.4	71.2	97.2	110	80	3.97	4.79	0.35	1.2	1.86	20.8164	0.73251	0.398656	5	1	5	5	5	4	3	2	1	4	4
35	29	22	23	161.2	55.3	71	91	114	68	4.36	4.92	1.4	1.26	3.6	21.2811	0.78022	0.440447	5	1	1	5	5	5	3	3	2	2	1
25	25	31	28	155.8	42.7	58	80.5	100	64	4.56	4.8	1.19	1.49	2.23	17.5911	0.720497	0.372272	5	1	4	4	5	5	3	3	1	2	2
30	23	42	28	163.7	55.5	65	85.5	98	68	4.4	4.8	0.66	1.22	3.36	20.7107	0.760234	0.397068	5	1	4	5	4	5	3	2	1	3	2
39	26	35	25	152.5	37.1	55.5	75	104	72	4.5	3.5	1.07	1.17	2.07	15.9527	0.74	0.363934	5	1	5	5	4	4	4	2	1	1	1
27	23	39	30	162.5	39.7	53	75.5	90	60	4.1	3.4	1.5	1.36	1.98	15.0343	0.701987	0.326154	5	1	5	5	5	5	1	3	1	2	3
33	30	44	41	151	37.5	62	75.5	104	60	4.3	4	0.52	1.61	2.51	16.4466	0.821192	0.410596	5	1	4	4	5	4	3	2	1	2	2
44	29	26	26	157	32.9	52	67	100	64	4.3	3.8	1.76	1.3	2.3	13.3474	0.776119	0.33121	5	1	5	5	5	5	1	2	1	4	3
41	35	50	37	157	50.5	69.2	85	110	72	4	4.6	1.05	1.15	3.42	20.4876	0.814118	0.440764	5	1	2	2	6	6	4	1	1	4	4
	32	33	26	170	51.8	67.8	86	120	68	4.9	5.1	1.31	1.3	3.46	17.9239	0.788372	0.398824	5	1	5	5	6	6	4	2	1	2	2
41	36	39	36	169	64.1	78	96.6	110	76	4.3	4	0.76	1.19	2.75	22.4432	0.807453	0.461538	5	1	5	4	5	5	3	2	1	2	2
31	32	32	28	157	47	68	85.8	110	64	4.3	5.2	1.97	1.14	3.72	19.0677	0.792541	0.433121	5	1	4	5	4	4	3	3	1	2	2
38	32	45	39	159.1	46.7	60	80.5	114	68	4.5	4.4	1.12	1.41	2.85	18.4492	0.745342	0.377121	5	1	5	5	4	4	3	3	1	1	2
	26	25	29	152.5	42.9	71	80.5	104	60	4.4	4.4	0.94	1.51	2.71	18.4467	0.881988	0.465574	5	1	4	4	5	5	3	2	1	4	4
26	26	37	33	162.8	42.9	55.5	79.5	110	76	4.6	6.2	0.92	2.18	3.86	16.1863	0.698113	0.340909	5	1	5	5	5	5	3	2	1	2	2
	32	43	29	153.3	50.2	66	84.5	104	68	4.8	4.9	0.52	1.61	3.14	21.3609	0.781065	0.430528	5	1	2	4	6	6	3	2	2	2	4
30	29	27	23	163	41.5	59	79.2	104	72	4.2	3.4	0.98	1.3	1.92	15.6197	0.744949	0.361963	5	1	4	4	3	5	4	2	1	2	1
34	27	36	29	150.5	38.5	54	77	104	64	4.5	2.7	0.94	1.05	1.62	16.9976	0.701299	0.358804	5	1	5	5	5	5	3	3	2	1	2
35	23	40	30	148.5	38.4	58.5	74.5	110	72	4.6	3	1.66	1.07	1.61	17.4132	0.785235	0.393939	5	1	5	5	4	4	3	3	3	2	1
30	32	40	31	147.5	39.8	58.6	76.8	110	68	4.5	3.3	1.11	1.04	2.18	18.2936	0.763021	0.397288	5	1	4	4	5	3	3	3	1	3	2
46	44	42	28	153.2	48.7	68	84.5	110	72	4.3	6.2	1.17	1.71	4.32	20.7497	0.804734	0.443864	5	1	4	5	4	4	4	2	3	2	1
44	35	38	26	178	66	75	93.6	110	76	3.7	3.6	0.98	1.18	2.42	20.8307	0.801282	0.421348	5	2	5	5	2	4	1	2	1	2	4
37	35	51	35	162	45.4	62	83.2	104	58	4.1	4.6	0.4	1.28	3.24	17.2992	0.745192	0.382716	5	1	3	5	5	4	2	2	3	2	1
48	35	50	35	156.5	39	54	77	104	68	4.8	4.7	0.58	1.82	2.6	15.9234	0.701299	0.345048	5	1	4	5	4	4	3	2	2	3	2
41	33	39	31	152	51.8	68	85	110	68	4.5	4.6	1.89	1	3.28	22.4204	0.8	0.447368	5	1	5	5	4	5	2	1	3	2	1
40	33	33	31	155	37.2	54.5	76	90	60	4.6	5.6	0.85	2.1	3.22	15.4839	0.717105	0.351613	5	2	5	5	1	5	2	3	1	2	2
30		41	31	162.5	40.1	58.8	77.8	98	60	4.1	3.5	0.76	1.28	1.99	15.1858	0.755784	0.361846	4	1	4	5	4	5	3	2	1	2	2
40	34	42	26	155.5	46.3	60	84.5	110	68	4.2	4.7	1.27	1.41	3.1	19.1479	0.710059	0.385852	5	1	4	4	4	5	3	2	1	1	1
38	28	32	34	158	45.7	66.2	80.4	104	58	4.7	4.7	0.74	1.54	2.95	18.3064	0.823383	0.418987	5	2	5	5	4	5	4	3	1	1	1
46	35	50	35	153.8	62.5	77	98	110	68	4.4	3.8	0.94	1.5	2.19	26.4221	0.785714	0.50065	5	1	4	4	4	4	4	3	1	3	2
43	22	31	30	161	70	82.5	100	110	76	5.1	4.9	4.17	1.06	3.08	27.0051	0.825	0.512422	5	2	5	5	4	4	3	3	2	1	2
35	35	46	34	152.5	44.7	61	85.5	104	72	4.1	4	1.06	1.36	2.44	19.2206	0.71345	0.4	5	1	5	5	5	5	4	1	2	2	2
30	27	44	34	151.5	35.8	57	83	96	60	4.8	3.1	0.65	1.37	1.55	15.5976	0.686747	0.376238	5	2	3	5	4	3	4	3	1	2	1
27	25	31	29	154.5	40.4	57	78	110	72	4.5	3.5	1.43	1.46	1.73	16.9248	0.730769	0.368932	5	1	4	5	5	4	2	2	2	1	2
25	23	27	25	157.5	40.3	62.5	78	110	72	4.5	3.7	0.75	1.16	2.51	16.2459	0.801282	0.396825	5	1	4	5	5	6	4	2	1	2	2
42	35	47	34	163.5	51.8	70	86	104	64	4.4	3.9	0.76	1.1	2.79	19.3773	0.813953	0.428135	5	2	4	4	4	4	4	2	1	2	2
29	20	40	30	156	36.9	60	76.2	104	64	4.3	3.9	1.43	1.23	2.28	15.1627	0.787402	0.384615	5	1	5	5	5	5	3	2	1	4	2
43	35	49	32	145.2	41.8	70.6	80	104	64						19.8264	0.8825	0.486226	5	1	4	4	5	5	4	1	3	1	1
28	32	33	30	160.5	45.7	64	85	104	68	4	4	1.08	1.17	2.55	17.7405	0.752941	0.398754	5	2	3	4	4	5	3	2	2	2	3
26	25	44	32	161.1	38	57	81	104	64	4.7	5.3	1.93	1.01	3.06	14.6417	0.703704	0.353818	5	1	2	4	5	5	4	2	1	2	1
34	28	28	26	165.3	68.3	87	97	104	60	4.7	5.3	2.18	1.45	3.72	24.9963	0.896907	0.526316	5	1	4	4	6	6	3	2	1	2	2
40	38	50	41	153.5	36.7	58	77	104	68	4.8	3.8	0.9	1.2	2.62	15.5758	0.753247	0.37785	3	1	2	3	5	5	3	3	1	2	2
23	23	33	30	163.8	42.9	62.8	78.1	120	68	4.7	3.4	1.54	0.9	2.32	15.9893	0.804097	0.383394	5	1	4	4	3	5	4	2	1	2	2
29	29	28	29	173	58.5	80.2	87.3	118	76	5.1	3.6	1.28	1.21	2.22	19.5463	0.918671	0.463584	5	1	5	5	6	6	5	3	1	3	4
	31	46	32	174	46.9	62	80.1	104	60	4.8	3.9	0.92	1.62	2.1	15.4908	0.774032	0.356322	5	1	5	5	6	6	3	3	1	4	2
31	28	39	26	151.8	61.1	81	96	110	60	4	4.8	1.64	1.26	3.2	26.5154	0.84375	0.533597	5	2	5	5	6	5	3	2	1	2	2
30	27	50	35	147.5	42.5	69	83	140	60	4	4.7	2.17	1.5	3.02	19.5346	0.831325	0.467797	5	1	2	3	5	4	3	2	1	2	4
25	20	36	31	150.8	37.1	58.2	73.8	110	64	4.7	4.4	1.36	1.59	2.62	16.3144	0.788618	0.385942	5	1	5	5	5	5	3	3	1	2	2
44	33	50	35	157	54.1	74.5	90	114	72	4.9	4.9	1.18	1.28	3.47	21.9482	0.827778	0.474522	5	1	3	5	5	5	3	2	2	2	1
44	26	38	27	159	47	65.2	83.8	110	68	4.8	3.7	1.48	1.12	2.29	18.591	0.778043	0.410063	5	1	4	5	5	3	2	1	2	2	1
25	27	29	22	170	43.1	58.2	78.6	104	68	4.5	4.3	0.96	1.49	2.71	14.9135	0.740458	0.342353	5	1	4	4	5	4	3	4	1	4	4
29	24	44	42	167.5	71.1	89.5	95.8	120	76	4.2	5.7	3.16	1.28	3.66	25.3419	0.934238	0.534328	5	1	5	5	5	6	3	3	1	2	2
36	21	45	28	164.6	46.8	65	87	104	58	4.4	4.2	1.38	1.61	2.41	17.2737	0.747126	0.394897	5	1	3	2	5	5	3	2	1	1	1
		48	49	154.7	37	64	77	104	60	4.4	4.7	0.8	2.03	2.34	15.4604	0.831169	0.413704	5	2	5	5	4	3	4	2	3	3	3
48	35	46	39	149.7	59.9	73	92	104	68	4.1	4.8	1.36	1.12	3.26	26.729	0.793478	0.487642	5	1	3	3	5	4	2	2	1	2	2
29	31	38	35	152.5	38.6	54	77	100	60						16.5977	0.701299	0.354098	5	1	5	5	5	5	3	2	2	2	4
	35	51	35	159.3	43.6	63.5	78.9	110	64	4.2	3.5	1.21	1.2	2.06	17.1813	0.804816	0.398619	5	2	4	4	4	4	3	2	3	2	1
34		50	35	178.8	66.3	75	92.2	114	76	3.7	4	1.44	1.13	2.73	20.7386	0.813449	0.419463	5	1	4	4	4	5	3	1	1	4	4
27	22	30	23	158	37.2	58	73	110	72	4.3	4.3	0.98	1.57	2.54	14.9015	0.794521	0.367089	5	1	4	5	5	4	3	3	1	2	2
40	34	50	35	151.7	53.8	67	90	110	72	4.3	3.7	1.6	1.33	2.05	23.3782	0.744444	0.441661	5	1	2	2	5	5	3	2	1	2	4
28	35	41	21	167.5	53.7	68.2	88.2	104	60	4.8	4.4	1.39	1.48	2.66	19.1401	0.773243	0.407164	5	2	4	4	5	4	2	2	2	1	1
32	23	31	27	166	73	84	101	120	72	4.3	4	1.15	1.41	2.34	26.4915	0.831683	0.395137	5	1	4	5	5	5	3	2	1	3	3
25	25	28	23	154.5	42.6	60.8	79.6	110	68	4.9	4.5	1.63	1.22	2.93	17.8465	0.763819	0.393528	5	1	5	5	4	4	3	3	1	4	3
		32	31	155.7	49.4	64	85.5	110	64						20.3774	0.748538	0.411047	5	1	5	5	5	5	4	1	2	2	4
32	33	48	35	159.9	41.3	63	78.5	104	60	4.9	3.6	1.09	1.48	1.85	16.153	0.802548	0.393996	5	1	5	4	5	2	3	2	1	1	2
36	38	46	39	154.8	45.3	66	87	114	68	3.9	4.2	1	1.77	2.43	18.9041	0.758621	0.426357	5	2	4	5	4	5	3	2	1	1	1
28	29	30	29	161.2	77.4	102.2	103.8	114	68	4.3	3.9	1.82	1	2.71	29.7859	0.984586	0.633995	5	1	4	4	5	4	4	3	2	3	2
	41	52	38	153	41.7	68.2	81	104	60	4.7	4.9	0.94	1.48	3.16	17.8137	0.841975	0.445752	5	2	3	3	5	4	4	2	3	1	2
	28	29	32	165.6	57.2	71.8	89	104	60	4.3	5.4	0.92	1.42	3.73	20.8581	0.806742	0.433575	5	2	5	5	5	5	4	2	1	4	3
21	26	26	21	149.5	50.8	74.8	84.1	110	68	5.3	3.6	1.37	1.19	2.13	22.7291	0.889417	0.500334	5	1	4	4	5	4	3	2	1	4	2
34	29	31	35	155.7	41.2	65	83	104	60	4.1	4.5	0.87	1.66	2.84	16.995	0.783133	0.417469	5	1	4	4	5	5	4	3	2	2	2
49		52	36	166	53.3	77.4	80.2	120	68	4.3	3.7	1.34	1.2	2.11	19.3424	0.965087	0.466265	5	1	5	5	4	5	4	2	1	4	1
30	35	51	35	163.8	48.6	70	87	104	60	4.3	4.5	0.52	1.35	3.1	18.1138	0.804598	0.42735	5	2	3	3	1	4	2	3	1	3	3
	27	37	28	155.1	41.1	58	79	110	76	4.2	5.2	0.68	1.63	3.21	17.0851	0.734177	0.373952	5	2	5	5	4	2	3	1	1	2	2
29		36	32	159.4	60.7	73.5	94	110	64	4.7	4.9	1.15	1.22	3.67	23.8898	0.781915	0.461104	5	2	5	5	5	5	5	3	1	4	4
34	34	50	32	159.3	40.3	59	76	104	60	4.5	3.8	1.56	1.27	2.41	15.8808	0.776316	0.37037	5	1	3	4	6	5	4	2	2	2	3
37	38	43	50	148.5	46.3	76.6	84	110	76	4.26	5.22	0.75	1.56	2.33	20.9956	0.911905	0.515825	2	2	5	5	5	5	3	2	3	2	2
44	35	46	35	163.5	43.9	62.2	79.2	104	54	3.73	3.76	0.6	1.31	2.28	16.4221	0.785354	0.380428	5	1	5	5	4	4	3	3	1	2	1
41	35	51	54	167	62.6	80.5	93.4	120	68	4.31	6	0.47	1.02	1.76	22.4461	0.861884	0.482036	5	2	5	5	4	4	3	3	1	4	4
35	27	50	35	159.3	44	59.5	77.5	104	60	4.29	4.39	0.57	1.85	2.2	17.3389	0.767742	0.373509	5	1	4	5	5	4	4	3	1	2	1
29	35	52	35	161.5	66.9	80	95	114	68	5.04	5.01	0.68	1.33	4.27	25.6496	0.842105	0.495356	5	2	5	5	5	2	2	2	1	2	4
30	37	50	33	155.7	47.3	65	85.5	104	60	4.25	4.33	0.45	1.52	2.75	19.5112	0.760234	0.417469	5	1	5	5	4	4	3	3	3	2	2
35	33	39	34	172.5	51.3	63.5	84	104	76	3.76	5.38	0.71	2.2	3.16	17.2401	0.755952	0.368116	5	1	2	3	4	4	3	2	1	1	2
34	23	40	22	165.9	53.7	64.5	86.5	98	64	4.88	4.83	1.23	1.32	2.02	19.5111	0.745665	0.388788	5	1	4	5	4	5	4	2	1	1	2
	35	50	35	161.2	44.3	62	78.2	104	60	4.63	6.08	0.95	1.32	1.63	17.048	0.792839	0.384615	5	1	4	5	5	5	3	3	3	1	1
42	31	32	29	152.8	62.1	82	91	128	68	3.94	5.42	0.3	1.71	0.85	26.5978	0.901099	0.536649	5	1	3	4	6	4	3	2	1	3	4
	35	32	27	161.3	45.3	63	84	104	72	4.76	4.19	1.2	1.22	2.41	17.4112	0.75	0.390577	5	2	3	4	5	3	3	3	1	3	2
	40	45	42	165.5	44.4	63.2	81.2	104	68	4.16	4.72	0.81	1.56	2.31	16.2101	0.778325	0.381873	5	1	5	5	5	4	3	3	3	1	1
26	26	35	28	148	46.9	76.5	85.5	110	76	4.99	5.17	0.47	1.46	2.25	21.4116	0.894737	0.516892	5	1	4	4	4	4	3	3	1	2	3
25	29	28	28	180.5	79	85.6	102.2	104	64	4.5	4.06	0.45	1.36	2.46	24.2478	0.837573	0.474238	5	2	4	5	5	5	5	2	1	2	2
	29	33	30	158.4	41.4	54	79	110	68	4.65	5.48	0.4	0.97	1.48	16.5002	0.683544	0.340909	5	2	5	5	4	5	2	1	1	3	4
29	24	34	25	172.4	74.7	81	102	110	64	4.09	4.59	1.48	1.28	1.68	25.1331	0.794118	0.469838	5	2	2	5	4	3	2	2	2	2	2
48	35	44	33	155.7	39.9	64	78	100	58	4.92	3.31	0.75	1.66	2.59	16.4587	0.820513	0.411047	5	1	5	5	6	4	3	2	2	3	2
38	32	48	34	166.5	57.6	75.5	87.8	110	68	3.98	3.57	0.4	1.5	1.74	20.7775	0.859909	0.453453	5	2	4	4	3	4	4	3	2	2	2
38	35	50	35	155	59.3	80	90.7	110	64	3.94	2.68	0.72	1.79	3	24.6826	0.882029	0.516129	5	1	4	5	4	5	3	3	1	2	2
24	23	25	27	161	42.7	60	81	110	72	5.18	4.85	0.83	1.43	2.28	16.4731	0.740741	0.372671	5	1	5	5	5	5	3	3	1	4	4
		50	35	158.3	44.1	56.5	78	110	72	4.01	4.3	0.69	1.81	3.26	17.5985	0.724359	0.356917	5	1	4	4	5	4	3	1	1	3	1
34	30	37	38	172.5	69.5	84.1	97	114	64	4.49	4.63	0.78	1.59	2.07	23.3564	0.86701	0.487536	5	2	5	5	4	5	4	2	1	1	2
48	35	52	40	153	36.1	59.7	74.2	104	64	5.19	4.42	0.86	1.56	2.56	15.4214	0.804582	0.390196	5	1	2	2	5	4	3	3	2	1	2
28	23	28	30	163.5	47.5	66.2	81.2	90	60	5.22	3.58	0.81	2.01	3.6	17.7688	0.815271	0.404893	5	1	5	5	5	6	4	3	1	2	3
30	35	27	31	144.4	37.7	63.5	77.5	98	60	5.03	3.66	0.44	1.65	2.98	18.0804	0.819355	0.439751	5	1	5	5	4	4	4	3	1	3	2
		40	33	153.5	42.5	59	76	104	60	4.38	4.38	0.72	1.31	2.72	18.0373	0.776316	0.384365	5	1	2	5	1	4	2	3	3	4	1
28	28	40	36	167	45.7	64.8	83.4	104	60	4.04	5.13	1.12	1.69	2.38	16.3864	0.776978	0.388024	5	1	5	5	5	5	3	3	1	2	2
40	35	43	34	151.2	31	55.5	70.2	90	60	3.85	4.4	0.67	1.32	2.38	13.56	0.790598	0.367063	5	2	3	4	4	4	3	2	1	3	2
	29	36	25	172.5	68	83.2	94.5	114	76	5.09	4.51	0.51	1.54	2.82	22.8523	0.880423	0.482319	5	1	4	4	4	4	1	3	2	4	2
35	32	40	34	150.5	38.1	57.5	77.5	104	64	4.87	3.76	0.58	1.15	2.9	16.821	0.741935	0.38206	5	1	2	4	4	3	4	3	3	3	1
32	32	29	28	166.1	50.5	64	82.5	104	68	4.33	5.64	0.51	1.43	1.66	18.3043	0.775758	0.38531	5	1	4	4	6	6	4	3	1	3	3
29	26	28	30	165.5	51.6	67	84.8	104	68	3.92	4.73	0.36	1.64	2.18	18.8388	0.790094	0.404834	5	2	4	5	3	5	3	2	2	2	1
33	23	34	26	158	40.8	61.6	78	114	68	5.12	3.69	0.75	1.78	2.15	16.3435	0.789744	0.389873	5	1	4	5	6	6	4	3	4	4	3
35	35	50	35	171	50.7	65	83.2	104	64	4.52	4.38	1.21	1.19	2.15	17.3387	0.78125	0.380117	5	1	3	4	5	5	3	3	1	4	2
	32	50	35	172	72.4	64.5	81	104	60	4.98	3.82	0.95	1.55	3.57	24.4727	0.796296	0.375	5	1	4	4	1	4	3	2	3	1	1
34	24	38	30	158.5	51.7	65	87	114	68	4.25	4.46	0.56	1.6	1.4	20.5794	0.747126	0.410095	5	1	5	5	5	4	3	2	1	2	2
	32	21	30	164.5	45.9	61.5	87	104	60	3.75	4.02	0.8	1.52	3.44	16.9621	0.706897	0.37386	5	2	2	2	5	5	3	3	1	3	2
		53	36	159	44.3	62.5	81	104	68	4.36	4.41	0.73	1.74	2.62	17.523	0.771605	0.393082	5	1	4	4	1	1	1	3	3	2	1
37	32	49	39	161.6	52.9	64.5	86	110	72	4.28	3.33	0.56	1.45	2.82	20.2569	0.75	0.399134	5	1	5	5	4	4	4	2	1	2	1
23	21	33	29	168.8	47.4	66.2	83.1	104	60	5.29	4.83	1.02	1.43	2.9	16.6354	0.796631	0.39218	5	1	5	5	5	4	3	3	1	3	3
47	31	47	35	148.1	39.8	59.5	75.5	114	60	5.21	3.94	0.62	1.62	2.75	18.1457	0.788079	0.401756	5	1	3	5	5	6	3	2	1	2	2
46	45	43	49	151.7	46.4	59	80	104	60	5.36	3.94	0.68	1.82	2.05	20.1626	0.7375	0.388926	5	1	3	3	4	3	2	2	2	2	2
22	35	42	24	149.6	38.9	59	80	96	60	5.7	5	0.77	1.48	1.92	17.3815	0.7375	0.394385	5	1	5	5	6	4	5	2	1	2	2
30	28	26	36	162.5	61.1	74.5	90	110	76	4.92	4.08	0.71	1.76	2.12	23.1385	0.827778	0.458462	5	1	5	5	4	4	2	3	1	1	2
27	22	33	24	150.7	45.6	65	78.5	104	76	3.98	4.46	0.67	1.24	2.51	20.0788	0.828025	0.431321	5	1	4	4	6	6	4	3	1	2	2
36	29	36	26	153.7	41.6	55.5	80	104	58	3.97	4.25	0.76	1.22	2.98	17.6094	0.69375	0.361093	5	1	5	5	6	6	3	2	1	1	2
36	30	32	38	160	48.9	63	85.5	104	72	3.94	4.1	1.09	1.15	2.59	19.1016	0.736842	0.39375	5	1	3	3	5	2	1	2	1	1	2
	27	34	30	157.6	48.3	64.5	83	104	72	4.59	4.06	0.77	1.13	3.29	19.4462	0.777108	0.409264	5	1	5	5	5	5	3	2	1	2	3
29	31	38	35	157.8	37.6	59	78	118	68	4.49	3.14	1.21	1.04	3.13	15.0999	0.75641	0.373891	5	1	5	4	4	5	3	2	1	2	2
35	26	40	35	144.6	36.8	56.5	76.5	98	64	4.69	6.35	0.42	1.29	2.41	17.5999	0.738562	0.390733	5	1	4	4	5	4	3	1	1	1	1
21	28	23	30	156.5	40.6	58	74	104	64	5.05	3.65	1.05	1.42	3.08	16.5767	0.783784	0.370607	5	1	3	3	5	5	3	2	1	3	3
32		28	27	174.2	53.1	65.8	85	110	60	3.91	4.06	0.61	1.23	2.98	17.4984	0.774118	0.377727	5	1	5	5	6	5	3	2	2	2	2
32	30	28	29	154	50.7	72	86.5	110	64	4.29	5.76	0.77	1.4	3.13	21.378	0.83237	0.467532	5	2	5	5	5	5	3	2	1	2	3
35	35	38	35	161.6	50.2	64	86	104	68	4.97	3.27	0.98	1.27	2.77	19.223	0.744186	0.39604	5	1	4	4	5	6	4	2	1	2	3
35	27	40	33	178.5	62.3	74.8	90.2	114	64	3.94	4.4	1.21	0.84	2.8	19.5529	0.829268	0.419048	5	1	4	5	5	6	3	3	1	2	2
27	29	33	28	163.9	47.9	67	81.5	104	72	3.78	4.85	0.7	1.09	1.45	17.8311	0.822086	0.408786	5	1	5	5	5	4	3	2	1	2	2
33	44	38	31	160.1	51.3	66	85	104	60	5.02	3.87	0.61	1.45	1.3	20.014	0.776471	0.412242	5	1	5	5	5	5	3	2	1	3	3
31	21	33	27	159.5	55.8	76.2	89	110	76	4.44	4.3				21.9337	0.85618	0.477743	5	1	5	5	5	4	3	3	1	4	4
26	21	27	24	162.7	46.4	57.5	77.5	110	72	4.21	5.02				17.5284	0.741935	0.353411	5	1	5	3	6	4	3	2	1	1	4
28	26	20	21	156.3	38.8	58	78	96	60	4.91	4.58	0.51	1.8	1.84	15.8823	0.74359	0.371081	5	1	5	5	4	4	3	2	1	3	4
34	26	48	39	163.6	51.2	59.5	80	98	60	4.8	5.33	0.38	2.08	1.97	19.1295	0.74375	0.363692	5	2	4	4	5	5	4	2	1	4	2
23	26	31	26	181	52.5	66.5	85	104	64	5.06	4.54	0.6	1.43	2.05	16.0252	0.782353	0.367403	5	1	2	2	5	5	3	2	1	1	2
27	22	34	29	162.1	45.9	64	81.5	104	60	4.2	4.49	0.78	1.32	2.85	17.4681	0.785276	0.394818	5	2	4	5	3	5	3	3	1	1	2
38	26	35	32	176.6	71.1	88	99.3	114	72	4.3	3.66	1.06	1.23	1.53	22.7976	0.886203	0.498301	5	1	4	4	5	5	3	1	1	2	2
	35	33	33	168	44.5	64.5	79.8	110	60	4.55	3.73	0.48	1.2	1.66	15.7667	0.808271	0.383929	5	1	5	5	6	6	4	1	1	2	1
45	31	43	34	160.2	44.9	59	80	104	64	5.16	2.52	0.86	1.09	3.21	17.4953	0.7375	0.36829	5	1	4	4	5	6	4	2	1	2	2
27	26	32	26	166.5	48.7	64	83.5	110	76	4.65	5.03	0.63	2.02	3.21	17.5671	0.766467	0.384384	5	1	5	5	5	6	3	3	1	2	2
	36	43	39	169.5	51.8	69.2	89.5	114	76	4.84	3.72	0.75	1.36	3.5	18.0298	0.773184	0.40826	5	2	5	5	4	5	3	2	2	2	2
27	26	39	30	163.9	44.3	58	77.5	96	60	5.14	4.96	0.59	1.72	2.25	16.491	0.748387	0.353874	5	1	4	5	5	6	4	2	1	2	2
36	26	36	29	161.7	56	72.5	88.5	114	72	4.7	3.96	0.75	1.5	2.18	21.4175	0.819209	0.448361	5	1	1	5	1	6	4	1	1	4	4
27	33	30	38	157.5	47.2	62	81.5	114	60	4	4.12	0.83	1.06	2.05	19.0275	0.760736	0.393651	5	1	5	4	5	5	3	2	1	2	2
33	37	40	36	146.2	43.5	62	83.5	110	60	4.6	3.73	0.82	1.03	2.23	20.3514	0.742515	0.424077	5	1	5	5	5	6	3	2	2	4	4
28	21	33	27	157.5	49.9	63	83.5	98	68	5.7	4.02	0.71	1.01	3.08	20.1159	0.754491	0.4	5	2	3	2	5	4	3	3	1	3	4
26	27	29	44	155.3	47.6	61	80	104	60	5	6.01	0.98	1.32	1.48	19.7362	0.7625	0.392788	5	2	5	5	5	5	3	1	1	2	2
	38	48	54	148.5	34.8	58.6	73	96	58	4.5	3.7	0.56	1.84	1.42	15.7807	0.80274	0.394613	5	1	2	3	5	5	3	2	1	1	2
21	24	21	26	175	66.6	75.2	94.5	114	68	4.6	4.04	0.71	1.21	2.62	21.7469	0.795767	0.429714	5	1	5	5	5	5	3	2	1	2	2
32	28	34	29	160.5	45.1	65.8	80.2	104	68	4	3.63	1.93	1.03	3.34	17.5076	0.820449	0.409969	5	1	4	5	5	5	2	2	1	2	3
48	42	49	38	154.5	50.5	60	82.5	110	68		3.37	0.86	1.37	2.69	21.156	0.727273	0.38835	5	1	5	5	5	5	1	1	1	4	4
31	35	36	33	177.3	77.3	87.2	99	114	68	4.9	3.98	0.93	1.28	2.12	24.5902	0.880808	0.491822	5	1	4	4	6	6	3	2	1	2	2
45	44	45	50	166.2	64.8	75	94	114	68	4.7	3.74	1.18	1.06	1.58	23.4592	0.797872	0.451264	5	1	5	4	5	5	3	2	2	2	2
29	29	38	26	161.2	45.4	60	83	104	68	4.7	3.8	0.8	1.49	1.99	17.4713	0.722892	0.372208	5	1	5	5	6	5	4	3	1	2	2
		34	27	164.4	55.1	66	82	98	60	4.9	4.11	0.52	1.14	1.94	20.3867	0.804878	0.40146	5	1	5	4	1	6	4	2	2	1	1
24	22	26	23	158.9	50	63.5	84.5	104	60	4.2	3.82	0.57	1.91	1.27	19.8026	0.751479	0.399622	5	1	5	5	5	4	3	2	1	2	3
31	26	30	25	174	55.6	70.4	84.8	104	68	4	5	0.89	0.96	2.59	18.3644	0.830189	0.404598	5	1	5	5	3	5	3	2	1	3	2
39	45	38	51	168.7	51.4	62	82.5	104	68	4.6	5.2	0.54	1.17	3.8	18.0606	0.751515	0.367516	5	1	5	5	5	4	3	2	1	2	2
46	33	35	31	163.5	46.9	63.2	84	96	64	5.7	4.5	1.67	1.32	2.76	17.5444	0.752381	0.386544	5	1	5	5	3	3	4	2	1	2	4
30	29	38	34	167.5	49.4	70	84	104	64	5	3.8	0.7	1.43	2.15	17.6075	0.833333	0.41791	5	1	5	5	5	5	3	2	1	3	3
33	38	36	32	164.1	46.9	61	81	104	60	4.5	3.5	0.73	1.36	1.95	17.4163	0.753086	0.371725	5	1	4	5	5	5	4	2	1	2	3
47	30	44	34	164.8	48.8	60	78.5	104	68	4.6	5.4	1.11	1.51	3.75	17.9682	0.764331	0.364078	5	1	5	5	5	4	3	3	2	2	3
20	20	29	26	153.3	35.6	53.5	74	104	60	4	2.2	0.47	1.09	1.06	15.1484	0.722973	0.348989	5	1	5	5	5	4	3	2	1	2	2
30	28	34	28	157.3	44.2	62	79	104	60						17.8634	0.78481	0.394151	5	1	5	5	5	5	3	2	2	2	2
31	23	22	23	183	58.9	69	89.2	104	68	4.9	4.2	0.82	1.45	2.62	17.5879	0.773543	0.377049	5	1	5	5	5	5	3	2	1	4	4
30	22	32	28	153.1	46.2	62	83.5	110	68	4.7	3.2	0.78	1.32	1.91	19.7102	0.742515	0.404964	5	1	5	5	5	6	3	3	1	2	2
32	21	34	27	145	35.1	56	69	104	60	4.7	4.6	1.09	1.54	3	16.6944	0.811594	0.386207	5	1	3	5	5	5	3	2	1	2	4
	35	49	37	162.5	50.7	64	87	98	64	4.9	4.2	0.86	1.31	2.61	19.2	0.735632	0.393846	5	1	4	2	5	4	3	3	1	3	2
	35	45	41	161	48.6	65	84	114	64	4.2	3.6	1.23	1.02	2.34	18.7493	0.77381	0.403727	5	1	2	4	5	5	3	2	1	2	1
		46	35	165.4	53.3	66.5	84.5	104	76	4.5	3.5	0.64	1.35	1.94	19.483	0.786982	0.402056	5	2	5	5	5	5	3	2	2	1	1
44	32	45	32	159.3	51	60	84	114	64	4.5	3.1	0.87	1.24	1.95	20.0973	0.714286	0.376648	3	1	4	4	4	5	3	2	1	1	4
28	27	30	32	158	42.8	62.5	77.5	104	60	4.2	3.5	1.09	1.55	1.96	17.1447	0.806452	0.39557	4	1	4	5	6	6	4	2	2	3	3
	22	33	34	167.7	46.3	64	83.2	110	58	4.8	3.5	0.98	1.34	2	16.4632	0.769231	0.381634	5	1	3	5	5	5	4	2	1	2	2
28	23	30	29	159.5	53.9	64	84.5	110	64	4.6	3.3	1.13	1.66	2.22	21.1869	0.757396	0.401254	5	1	5	5	4	3	3	2	1	2	4
27	26	30	31	151.2	41.1	58	75	110	76	4.5	3.5	0.97	1.25	2.29	17.9779	0.773333	0.383598	5	2	4	5	5	4	4	2	2	3	2
29	24	28	25	159.5	47.6	63	84	104	58	4.3	4.2	1.19	1.31	2.64	18.7105	0.75	0.394984	5	1	5	5	5	3	3	3	1	1	1
29	20	28	21	169.5	48	66.4	80.2	104	68	3.9	4	0.67	1.5	2.28	16.7071	0.82793	0.39174	5	1	5	5	5	5	3	3	1	2	2
36	24	27	28	153	37.1	59.2	76	98	60	4.6	5.7	1.29	1.75	3.39	15.8486	0.778947	0.386928	5	2	5	5	6	6	4	2	1	2	3
23	39	24	30	161.5	46.1	63.8	82	104	60	4.1	3.4	1.45	0.72	2.35	17.6749	0.778049	0.395046	5	1	5	5	5	5	4	3	1	2	2
31	23	32	31	154.5	45.6	61	82	104	76	4.6	3.8	1.05	1.63	1.86	19.1033	0.743902	0.394822	5	1	5	5	6	6	4	2	1	2	4
29	24	49	35	148.5	33.4	58.5	70.5	104	60	4.9	4.6	1.8	1.4	2.7	15.1458	0.829787	0.393939	5	2	4	5	5	5	3	2	1	2	1
30	35	38	37	155.8	46.2	61.5	80	104	76	4.2	4.2	1.74	1.07	2.88	19.033	0.76875	0.394737	5	1	5	5	5	5	3	2	1	2	2
44	42	52	47	165.2	42.8	55.5	76.5	90	60	4.3	4.6	0.71	1.59	2.91	15.6828	0.72549	0.335956	5	1	4	5	6	6	4	2	1	2	1
	20	26	23	144.2	32.2	53	69.5	110	64	4.6	4.5	1.37	1.47	2.81	15.4855	0.76259	0.367545	5	1	5	5	5	6	4	2	1	3	4
42	35	39	29	166.6	46.5	66.4	83	104	60	4.7	4.5	0.8	1.72	2.62	16.7534	0.8	0.398559	5	1	5	5	5	5	4	1	1	2	2
45	32	29	30	166.2	51.6	72	87	114	68	4.7	4.3	0.7	0.94	3.26	18.6805	0.827586	0.433213	5	2	3	5	5	5	4	2	2	2	2
	33	38	28	161.6	46.4	63	84.5	98	68	4.3	4.1	1.77	0.93	2.71	17.7679	0.745562	0.389851	5	1	4	4	5	5	4	2	1	2	4
24	20	22	22	157.9	43.9	56	79	104	60	4.1	4.2	1.18	1.61	2.25	17.6076	0.708861	0.354655	5	1	5	5	5	5	3	3	1	2	1
41	42	31	33	176.5	61	65.5	91.1	128	76	4.4	3.8	0.64	1.23	2.47	19.5813	0.71899	0.371105	5	1	5	5	5	4	4	2	1	2	2
22	23	27	23	161.6	44.8	60.5	76.5	104	60	4.2	5.5	1.92	1.08	3.74	17.1552	0.79085	0.374381	5	1	3	3	4	5	3	2	1	1	2
28	28	56	31	152	43.4	60.5	77.5	96	60	4.5	4.3	0.75	1.35	2.93	18.7846	0.780645	0.398026	5	1	5	5	5	5	3	2	1	4	2
31	32	31	32	159.8	40.1	58	75	110	60	4.8	3.9	1.03	1.16	2.58	15.7033	0.773333	0.362954	5	2	4	5	6	4	3	3	1	2	1
35	25	32	41	158.5	34.6	52.5	70	90	60	4.3	4.6	0.82	1.77	2.39	13.7727	0.75	0.33123	5	1	5	5	4	5	3	2	1	2	2
38	35	40	37	157	46.8	66	82.5	104	76	5	3.9	1.85	0.99	2.59	18.9866	0.8	0.420382	5	1	5	5	5	6	3	2	1	2	4
31	29	34	33	153.7	47.1	65	81	90	60	3.9	3.3	0.59	1.32	1.78	19.9376	0.802469	0.422902	5	2	4	4	5	4	5	2	3	3	2
34	30	39	35	165	50.7	66.6	87	110	60	4.7	5.9	0.97	1.71	3.78	18.6226	0.765517	0.403636	5	1	5	5	5	4	3	2	1	2	2
26	20	27	25	164.3	45.1	59	76.5	100	58	4.8	4	1.46	1.37	2.35	16.7071	0.771242	0.359099	5	1	5	5	5	5	2	2	1	2	3
37	32	29	29	155	44.6	61	78	98	68	4.2	4.2	1.11	1.46	1.92	18.564	0.782051	0.393548	5	1	2	5	1	4	2	2	1	2	2
46	35	40	36	153.5	39.9	61.2	78	104	60	4.7	3.3	1.16	1.02	2.45	16.9339	0.784615	0.398697	5	1	4	2	4	3	3	2	1	4	4
25	30	33	30	146.1	47.2	74	82.8	112	60	4.4	4	1.15	1.22	2.54	22.1127	0.89372	0.506502	5	1	5	5	6	6	4	2	1	2	2
43	45	51	46	150.6	52.4	78.6	85.7	112	60	5	4.2	2.27	1.05	2.62	23.1037	0.917153	0.521912	5	1	5	5	4	5	3	2	1	1	2
47	48	51	35	158.5	41.1	60	77	108	56	5.1	4	0.76	1.48	2.44	16.36	0.779221	0.378549	2	1	5	5	5	5	4	1	1	1	2
27	35	37	30	154.6	47	75.5	86	105	60	5.2	5.4	0.96	1.32	3.93	19.6643	0.877907	0.488357	5	2	4	4	4	4	3	2	2	1	1
47	35	36	35	148.8	42.9	68	81.6	90	60	5.3	3.7	1.33	1.18	1.95	19.3754	0.833333	0.456989	5	1	5	5	5	3	3	2	3	2	2
40	35	24	29	170.4	54	64	84	112	60	4.8	4.3	0.61	1.41	2.77	18.5975	0.761905	0.375587	5	1	5	5	5	6	4	2	1	2	2
22	35	44	36	177.7	57.8	71.7	82.7	120	67	4.8	3.7	0.58	1.61	1.98	18.3043	0.866989	0.403489	5	1	5	5	5	4	4	1	1	2	4
	28	34	24	164.2	45.5	74	83.7	112	60	4.8	5.3	1.07	1.71	3.18	16.8758	0.88411	0.45067	5	1	3	4	5	5	3	2	2	2	2
46	38	36	26	170.5	61.8	79.7	88	120	67	4.6	5.3	1.51	1.22	3.73	21.2588	0.905682	0.467449	5	2	5	5	3	2	3	1	3	2	2
35	22	34	23	170.2	48.7	62	79	112	67	5.3	4	1.26	1.58	2.01	16.8116	0.78481	0.364277	5	1	5	5	5	5	3	3	1	2	2
39	35	45	43	158	47.7	60	84	108	60	4.7	3.6	0.96	1.66	1.75	19.1075	0.714286	0.379747	5	1	3	4	5	5	3	1	3	1	2
34	30	41	40	151.8	41.2	61	81	105	67	4.5	4	0.91	1.32	2.54	17.8794	0.753086	0.401845	5	1	3	5	4	5	3	2	3	2	2
29	35	27	25	161.5	54.1	63	89	120	67	4.2	3.6	0.77	1.34	2.13	20.7421	0.707865	0.390093	5	1	5	5	4	5	3	2	1	1	2
41	25	35	34	144.5	51.2	86.8	91	112	60	4	4.6	1	1.35	3.37	24.5208	0.953846	0.600692	5	1	5	5	6	5	3	2	1	2	2
30	35	44	36	174.5	70.2	70	90	116	60	4.8	4.7	1.03	1.46	2.98	23.054	0.777778	0.401146	5	1	5	5	5	5	3	1	1	1	1
40	35	35	39	162.1	52.9	64	90	90	60	5.2	5.3	0.96	1.31	3.85	20.1321	0.711111	0.394818	5	2	4	4	5	5	3	1	1	1	1
37	21	27	30	173.3	55.7	67	85.5	120	60	4.6	4.5	0.82	1.55	2.77	18.5463	0.783626	0.386613	5	1	5	5	5	5	4	3	1	1	2
48	30	40	31	163	59.8	70	90	105	60	4.1	3.7	1.03	1.28	2.26	22.5074	0.777778	0.429448	5	1	5	5	4	3	2	2	1	2	3
25	31	41	33	158	58.7	81.3	89.5	120	75	4.5	3.5	0.82	1.13	2.2	23.5139	0.90838	0.514557	5	1	4	5	5	5	3	2	1	2	3
36		36	35	151.1	40.5	76	80.6	105	67	4.8	3.6	0.55	1.19	2.29	17.7389	0.942928	0.502978	5	1	4	5	1	4	3	2	1	1	4
29	43	39	36	152.5	84.3	97	111	120	67	5.7	4.8	1.07	1.19	3.58	36.2483	0.873874	0.636066	5	1	5	5	5	5	4	2	1	2	3
48	36	35	32	170.8	69.2	79	92	120	75	5.2	3.6	1.18	1.16	2.33	23.7209	0.858696	0.462529	5	1	4	4	2	5	3	2	2	4	3
40	35	48	49	173.4	49.5	65.5	81	105	60	5.8	4.6	0.97	1.19	3.25	16.4629	0.808642	0.377739	2	1	3	5	4	5	3	3	2	1	4
34	35	37	28	157.4	54.4	79	88	112	60	5.4	5	0.73	2.08	2.7	21.9578	0.897727	0.501906	5	1	3	5	4	5	3	2	1	2	3
28	28	40	33	159.2	50.8	74	87	105	75	4.3	3.9	1.11	1.28	2.38	20.0437	0.850575	0.464824	5	2	5	5	4	4	3	2	1	1	1
42	44	30	28	171.6	52.3	72	82	108	60	5.1	2.9	0.65	1.06	1.85	17.761	0.878049	0.41958	5	1	3	3	6	6	3	3	1	3	2
37	35	42	38	174.6	51.3	63	80.5	90	60	4.1	3.3	0.88	1.41	1.63	16.8279	0.782609	0.360825	5	1	3	3	4	5	3	2	1	4	1
34	29	38	27	174.6	58.4	69	82	108	60	4.5	4.7	0.84	1.55	2.8	19.1569	0.841463	0.395189	5	1	5	5	5	4	3	2	1	2	2
39	35	43	50	172.7	67	82	92	108	60	5.6	4.4	1.82	0.9	2.93	22.4642	0.891304	0.474812	5	1	4	4	5	5	2	2	1	2	1
29	35	32	41	179	64.1	80	88	112	60	5	3.5	0.39	1.4	2.11	20.0056	0.909091	0.446927	5	2	5	5	4	4	4	3	1	4	4
24	28	39	31	168.7	57.9	70	91	120	75	4.7	5.3	0.57	1.75	3.57	20.3446	0.769231	0.414938	5	2	4	4	5	5	3	3	2	4	1
23	35	45	36	162.2	53.4	75.8	85.9	90	60	4.4	3.9	0.79	1.49	2.28	20.2974	0.882421	0.467324	3	1	2	5	5	5	3	1	1	2	2
39	36	50	44	163.3	49.6	68	84	90	63	4	4.8	0.63	1.88	2.69	18.5998	0.809524	0.416412	5	1	5	5	4	5	3	2	2	1	2
39	41	38	31	154.2	54.2	76	90	116	60	4.3	5.1	1.72	1.22	3.47	22.7945	0.844444	0.492866	5	1	3	3	5	5	3	2	1	1	1
27	27	28	24	157.5	46	76.8	86	93	63	5.1	2.8	0.91	1.07	1.62	18.5437	0.893023	0.487619	5	1	5	5	5	5	3	2	1	1	2
36	35	42	41	175.3	58.8	68.5	84	112	60	5.3	3.5	0.56	1.4	1.76	19.1343	0.815476	0.390759	2	2	4	5	3	3	4	2	1	1	1
37	35	40	32	166.8	44.7	63	78	112	67	4.2	3.7	1.13	1.63	1.81	16.0663	0.807692	0.377698	5	2	4	4	5	5	3	3	1	2	1
23	32	33	27	163.5	54.3	77	85	112	67	4.9	4.3	0.63	1.5	2.85	20.3125	0.905882	0.470948	5	1	5	5	5	6	3	2	1	2	1
36	26	38	31	154.8	48.1	65	85	112	60	4.8	4.8	1.29	1.79	2.87	20.0726	0.764706	0.419897	5	1	4	4	4	5	3	2	1	2	1
40	29	39	25	166.2	48.3	60	79	120	78	4.9	4.2	1.2	1.31	2.48	17.4858	0.759494	0.361011	5	1	5	5	4	5	3	2	1	1	2
42	35	31	29	162.3	46.9	65	84	112	60	5.4	4.1	1.26	1.34	2.45	17.8047	0.77381	0.400493	5	1	1	5	1	4	2	2	1	2	2
41	29	40	33	159.8	55.3	69	92	105	60	4.6	4.5	0.73	1.1	3.35	21.6557	0.75	0.43179	5	1	3	5	5	3	3	2	2	1	2
27	24	32	23	174	57.1	79	86.8	105	75	4.4	3.4	0.57	1.08	2.2	18.8598	0.910138	0.454023	5	1	4	4	5	5	3	2	1	1	1
	23	27	30	159.5	58.6	73	88	112	60	4.7	4.2	1.07	0.95	3	23.0344	0.829545	0.45768	5	2	4	5	4	2	2	2	2	1	2
31	29	47	44	161.8	44.7	59	80	108	52	4.5	3.77	0.66	1.62	2.98	17.0746	0.7375	0.364648	5	1	4	4	5	5	4	2	2	2	2
32	35	50	40	164.2	57.9	62	84	120	67	4.5	5.02	0.73	0.95	1.74	21.475	0.738095	0.377588	5	1	5	5	5	5	3	2	1	4	2
32	29	41	25	172.8	63.1	79.5	89.7	108	60	4.2	3.36	0.54	1.38	1.53	21.1321	0.886288	0.460069	5	1	1	5	5	5	3	2	3	2	4
	43	34	29	175.8	58.8	63	87	120	75	4.8	3.91	0.59	1.26	2.69	19.0257	0.724138	0.358362	5	1	3	4	6	6	3	2	2	2	2
	32	44	37	157	45	61	80	105	60	4.6	2.73	1.24	1.34	1.09	18.2563	0.7625	0.388535	2	1	5	5	4	5	3	1	1	1	1
43	49	41	30	173.2	64	85.5	92	105	75	4.5	3.95	0.53	1.95	1.84	21.3346	0.929348	0.493649	5	1	5	5	5	4	3	2	1	2	4
25	26	52	35	175	57	77	85	112	60	4.3	5.43	0.42	1.64	1.48	18.6122	0.905882	0.44	5	1	5	5	4	4	2	2	1	2	1
49	25	39	31	163	45.7	69.5	75	112	67	3.9	4.95	0.55	1.25	3.11	17.2005	0.926667	0.42638	5	2	4	5	6	4	3	2	2	4	4
45	35	39	32	172.8	74.4	81	94	112	75	4.6	4.49	0.91	1.35	2.62	24.9164	0.861702	0.46875	5	1	2	4	6	6	3	2	1	2	1
31	42	47	43	159.8	47	74.9	81.8	112	67	4.1	4.41	0.7	0.95	1.92	18.4054	0.915648	0.468711	5	1	5	5	4	5	3	1	2	2	2
48	43	46	45	173.7	58	71.5	84.6	112	60	4.6	4.56	1.41	1.27	2.77	19.2233	0.845154	0.411629	3	1	4	3	5	5	3	2	2	2	1
36	33	40	28	177	58.5	77	84	97	75	4.9	3.27	0.71	1.57	1.89	18.6728	0.916667	0.435028	5	2	4	5	4	4	3	2	1	1	1
34	48	49	36	148.7	37.2	65	79.5	105	60	4.2	3.77	0.52	1.33	1.55	16.8237	0.81761	0.437122	5	1	5	5	4	3	3	2	2	2	4
	30	36	30	166.5	66.7	83.5	93.5	120	75	4.3	4.74	0.67	2.28	0.98	24.0601	0.893048	0.501502	5	1	5	5	5	5	3	2	1	3	3
29	35	42	26	172.3	52.8	75	81.5	120	60	4.6	3.94	0.64	1.26	1.76	17.7854	0.920245	0.435287	5	2	4	5	4	5	3	2	1	1	1
44	24	41	28	159.5	44.6	67	82	105	60	4.7	3.34	0.7	1.46	2.23	17.5313	0.817073	0.420063	5	1	5	5	6	5	3	2	2	1	1
	33	44	41	161.2	55.2	77.6	85	112	60	4.7	4.15	0.94	1.45	3.16	21.2427	0.912941	0.48139	5	2	5	5	4	3	2	2	3	1	1
32	33	31	27	163	53.9	67	83.9	90	60	4.3	3.63	0.68	1.4	1.76	20.2868	0.79857	0.411043	5	1	4	4	3	3	3	2	2	1	2
34	38	42	33	175	46.5	70	77	120	67	4.1	3.65	0.72	1.72	1.68	15.1837	0.909091	0.4	5	1	3	5	4	5	3	2	1	2	2
42	25	53	42	164	54	70	90	112	60	4.4	4.15	0.42	1.34	2.1	20.0773	0.777778	0.426829	5	2	5	5	5	3	3	2	1	1	1
27	35	49	50	155.3	51.2	75	85	120	60	4.2	3.75	1.17	1.74	3.29	21.2289	0.882353	0.482936	5	1	4	4	4	4	3	1	1	1	2
21	29	39	32	166.2	50.1	62	81	97	75	4.5	6.06	0.35	1.97	2.41	18.1374	0.765432	0.373045	5	1	4	4	5	5	4	2	2	2	2
	31	43	34	162.1	45.9	62	79	112	60	4.8	3.22	0.82	1.23	3.63	17.4681	0.78481	0.38248	5	1	3	5	4	5	3	2	1	1	1
40	38	31	32	167.4	58.9	79	89	120	75	4.3	4.56	0.84	1.58	2.8	21.0186	0.88764	0.471924	5	2	2	4	2	3	3	2	2	2	3
42	35	45	34	173.4	56.4	67	87	112	67	5	4.08	0.58	1.3	2.18	18.7578	0.770115	0.38639	5	1	5	5	5	3	3	2	1	2	2
	42	40	34	154.7	44.7	71	80	112	67	3.9	4.95	0.44	1.56	1.35	18.6779	0.8875	0.458953	5	1	5	5	6	5	3	2	2	1	2
33	37	40	33	155.6	50.7	78	88.8	97	67	4.7	3.97	0.9	1.01	2.15	20.9406	0.878378	0.501285	5	1	5	5	6	6	3	1	3	1	1
29	36	41	32	168.8	57.5	79	92	90	63	4.8	3.78	0.72	1.19	2.36	20.1801	0.858696	0.468009	5	1	3	3	5	5	3	2	2	1	1
	35	40	30	170.6	61.4	77	87.5	112	67	4.2	4.25	1.15	1.42	2.43	21.0965	0.88	0.451348	5	2	2	2	4	4	3	2	2	2	3
	35	39	34	169.5	52.8	67	83	120	67	4.7	4.94	0.61	2.16	2.9	18.3778	0.807229	0.39528	5	1	5	5	6	4	2	3	2	3	3
	24	51	40	160	52	77	85	120	70	4.4	4.54	0.67	2.08	2.41	20.3125	0.905882	0.48125	5	1	3	4	5	5	2	2	3	1	1
33	38	29	23	170.6	76.2	82	99	120	90	5	4.95	0.76	1.35	3.11	26.1816	0.828283	0.480657	5	1	4	4	5	6	5	2	3	2	2
35	32	39	34	158	61.1	63	95	97	71	5.1	4.77	0.66	1.43	2.25	24.4752	0.663158	0.398734	5	2	5	5	5	5	5	2	3	2	2
44	35	43	41	166	56.6	75	85	112	60	5.2	4.22	0.54	1.9	1.92	20.54	0.882353	0.451807	5	1	2	5	5	4	3	1	1	1	2
27	20	24	23	177.4	66.9	67	83.5	105	75	5.3	4.41	0.47	1.66	2.54	21.2578	0.802395	0.377678	5	1	5	5	5	6	4	2	1	4	4
41	27	32	28	154	51.3	69	84.6	90	67	4.8	4.81	0.64	1.29	2.87	21.631	0.815603	0.448052	5	1	5	5	5	5	3	2	1	2	2
48	43	43	40	164	48.6	68.6	83	93	60	4.8	3.74	0.69	1.38	0.73	18.0696	0.826506	0.418293	5	1	1	5	1	1	3	2	1	1	1
	29	24	23	177.2	74	82	97	112	60	4.8	5.72	0.54	1.32	1.74	23.567	0.845361	0.462754	5	2	2	4	4	4	5	2	3	2	4
31	33	48	41	173.4	53.6	63	85	108	64	4.6	4.86	0.39	1.53	1.79	17.8265	0.741176	0.363322	5	1	4	4	6	5	4	2	1	4	2
58	35	50	35	171.5	114.7	109	115	127	78	5.3	5.43	0.44	1.47	1.99	38.9974	0.947826	0.635569	5	1	5	5	5	5	3	2	1	4	1
31	31	38	28	154.6	46.2	62	82	112	67	4.7	4.3	0.65	1.68	1.01	19.3296	0.756098	0.401035	5	1	3	3	4	5	2	2	2	1	2
29	28	35	25	172.5	95.1	96.8	100	105	71	4.5	4.26	0.93	1.41	3.06	31.9597	0.968	0.561159	5	1	5	5	5	5	3	2	1	4	3
23	23	47	29	171.3	59	69	88.5	112	60	4.2	2.69	0.55	1.23	3.83	20.1065	0.779661	0.402802	5	1	5	5	5	5	4	2	1	1	2
	35	51	50	161.5	44.7	65.6	78	112	67	4	4.5	0.49	1.31	2.77	17.1381	0.841026	0.406192	5	1	1	5	1	5	1	1	1	1	4
27	29	46	31	167.8	54.8	73.7	86.9	90	60	4.8	5.71	0.52	1.52	2.49	19.4624	0.848101	0.439213	5	1	5	5	5	4	3	2	1	2	2
32	29	36	32	157.5	39	61.6	75	112	60	5.2	5.86	0.56	1.71	2.31	15.7218	0.821333	0.391111	5	1	4	4	6	6	4	2	1	2	1
28	44	48	39	176.4	64.5	76	94	112	67	4.6	4.61	0.62	1.27	1.99	20.7282	0.808511	0.430839	5	1	4	4	3	3	3	2	1	2	2
	42	56	54	164.3	41.1	60	79	105	71	4.1	4.4	0.52	1.46	3.19	15.2253	0.759494	0.365186	5	2	3	3	2	4	3	1	3	1	2
32	30	39	30	165.4	66	81	84.6	120	82	4.5	5.55	0.74	1.42	2.33	24.1253	0.957447	0.489722	5	1	3	4	5	5	2	2	1	4	4
39	48	51	30	151	48.4	67	82.8	90	60	4.8	3.57	1.48	0.78	3.16	21.2271	0.809179	0.443709	5	1	5	5	5	4	3	2	1	2	4
26	40	43	37	163.3	52.1	69	84.8	112	67	5.7	4.36	1.53	1.3	2.75	19.5373	0.813679	0.422535	5	1	2	4	5	5	3	2	2	2	4
	35	40	34	157	50.4	68	85	108	60	5.2	4.07	0.89	1.22	1.97	20.4471	0.8	0.433121	5	1	5	5	4	5	3	2	1	1	4
40	29	50	33	147.2	41.6	62	79	90	60	5.8	4.1	0.57	1.4	2.07	19.199	0.78481	0.421196	5	1	3	3	5	5	3	2	2	2	2
37		45	40	154.7	61.3	66	89	105	75	5.4	3.18	0.62	1.5	2.36	25.6141	0.741573	0.426632	5	1	5	4	5	5	4	2	3	2	4
	46	28	23	171.5	66	75	90	120	60	4.3	4.67	1.04	1.41	3.03	22.4396	0.833333	0.437318	5	1	5	5	4	5	3	3	3	4	4
38	35	49	35	151.7	46.4	61	83	105	60	5.1	4.06	1.22	1.16	2.72	20.1626	0.73494	0.402109	5	2	4	4	4	4	3	1	1	1	1
30	29	50	46	177.5	96.7	95	106	120	82	4.1	2.74	1.31	1.04	3.08	30.6923	0.896226	0.535211	5	1	4	3	4	4	3	2	1	3	3
	23	24	28	155	46.1	62	82	112	60	4.5	5.3	1.34	0.82	1.81	19.1883	0.756098	0.4	5	1	5	5	4	4	3	2	2	2	4
30		43	40	163.3	43.8	62.5	78	97	67	5.6	4.16	0.6	1.67	2.18	16.4249	0.801282	0.382731	5	1	5	5	4	4	2	3	2	1	2
35	34	37	33	171.5	80.2	83	93.8	120	75	5	3.88	0.61	1.19	1.76	27.2675	0.884861	0.483965	5	1	4	4	5	5	3	2	3	1	1
	44	24	21	157	49.7	64.5	83.5	112	67	4.7	5.78	0.65	1.1	1.84	20.1631	0.772455	0.410828	5	1	5	5	5	5	3	2	1	4	2
41	35	38	38	160.3	41.7	62	73	112	60	4.4	3.85	0.83	1.18	2.41	16.2281	0.849315	0.386775	5	2	4	5	4	4	3	2	2	2	1
		47	31	160.7	53.4	74	88	97	67	4	4.82	1.23	1.25	2.54	20.678	0.840909	0.460485	5	1	5	5	6	5	4	2	1	1	1
32	35	50	35	168.4	48.7	63	85	112	67	4.3	3.26	0.46	1.71	2.15	17.1729	0.741176	0.374109	5	1	5	5	5	5	3	2	1	3	3
33	35	43	38	156.6	47.6	64	85	108	60	5.1	3.56	0.55	1.32	3.55	19.4099	0.752941	0.408685	5	1	5	5	5	5	3	1	2	1	4
23	24	43	29	175.2	62.3	68	85	105	63	5.3	4.46	0.67	2	2.05	20.2964	0.8	0.388128	3	1	3	5	6	6	4	2	1	4	2
48	29	50	38	163.2	56	68	89.5	112	60	4.2	3.52	0.79	1.09	3.42	21.0256	0.759777	0.416667	5	2	2	5	3	5	3	2	1	2	4
39	24	40	31	158.3	46.9	63	80	90	67	4.9	4.6	0.92	1.61	3.16	18.7159	0.7875	0.397979	5	2	2	3	5	5	2	2	2	1	1
40	35	50	35	171.6	64.5	70	85	112	60	4.8	4.1	0.71	1.53	1.89	21.9041	0.823529	0.407925	5	1	5	5	6	6	4	3	1	3	2
38	30	43	31	174	58.3	67.5	85	120	67	4.9	4.12				19.2562	0.794118	0.387931	5	1	5	5	6	6	4	2	1	4	4
30	24	31	34	179	69	78	89	120	75	5.4	4.52				21.5349	0.876404	0.435754	5	2	4	4	5	3	3	1	3	1	4
38	23	43	45	160	51.2	64	80	112	60	4.7	3.7	1.71	1.03	2.49	20	0.8	0.4	5	2	5	5	4	2	4	2	2	3	2
45	35	33	35	187.2	66.4	71	93	112	60	4.6	4.3	0.81	1.27	2.85	18.9477	0.763441	0.379274	5	1	5	5	6	6	3	2	1	3	2
40	30	33	29	160.4	41.7	59.7	75.5	105	75						16.2079	0.790728	0.372195	5	1	4	5	4	4	3	2	1	2	2
41	31	26	29	156.7	40.6	67	75.9	105	75	4.5	3.5	0.9	1.04	2.45	16.5344	0.88274	0.427569	5	1	5	5	6	6	3	2	1	1	4
41	24	29	27	165.7	45.6	61	78	105	60	5.2	3.3	0.58	1.19	2.14	16.6081	0.782051	0.368135	5	2	3	5	5	3	3	2	1	1	1
30	40	33	27	170	61.8	70	87	120	67	4.2	4.5	0.69	1.42	2.91	21.3841	0.804598	0.411765	5	1	5	5	6	5	4	2	2	2	1
34	37	45	29	159	45.2	63	81	105	60	4.1	3	0.44	1.27	1.72	17.879	0.777778	0.396226	5	2	4	5	6	4	4	3	1	2	3
43	35	47	35	176.7	74	76.5	91	120	75	4.4	3.8	0.75	1.56	2.32	23.7006	0.840659	0.432937	5	1	5	5	6	5	3	2	2	3	2
44	27	30	27	177.3	58	67.8	88	120	60	4.7	3.6	0.49	1.14	2.39	18.4506	0.770455	0.382403	5	1	5	5	5	5	4	2	1	2	2
41	46	47	47	170.8	65.8	70	88	108	60	4.6	3.5	0.58	1	2.43	22.5554	0.795455	0.409836	5	2	3	1	3	5	2	2	1	3	1
27	26	33	24	144.3	44.9	70	77	112	67	5.2	4.2	0.8	1.25	2.98	21.5632	0.909091	0.4851	5	1	5	5	5	5	3	2	2	1	1
32	45	39	28	167.6	53.6	64	88	105	67	4.1	3.3	0.82	1.07	2	19.0817	0.727273	0.381862	5	1	4	5	3	5	3	2	1	3	2
33	34	47	35	161	50	66	86	112	60	4.5	3.8	0.74	1.75	2.08	19.2894	0.767442	0.409938	5	1	5	5	5	4	3	2	1	2	3
	35	34	34	158.3	45.7	61	85	105	82						18.237	0.717647	0.385344	5	1	4	4	5	5	3	2	2	1	1
27	48	28	28	156.8	45	63	76	112	67	5	5.1	1.35	1.5	3.29	18.3029	0.828947	0.401786	5	1	4	5	5	5	3	3	2	2	3
21	42	24	24	168.7	57.4	66	83	120	60	4.7	3.5	0.88	1.06	2.6	20.1689	0.795181	0.391227	5	1	5	5	4	4	3	2	1	3	4
	35	40	24	161.7	54.2	65	83	105	67	4.7	3.6	0.83	1.27	2.04	20.729	0.783133	0.401979	5	1	3	3	5	5	3	3	1	1	2
35	27	36	31	176.7	53.7	62	79.8	112	60	3.4	2.5	1.24	1.28	0.98	17.1989	0.776942	0.350877	5	1	5	5	5	6	3	2	1	2	2
37	26	28	30	171.5	48.4	62	80	112	60	4.8	4.2	0.95	1.32	2.7	16.4557	0.775	0.361516	5	1	4	4	5	5	3	2	1	2	3
22	24	29	28	162.7	64.2	80	97	120	60	5	3.5	0.83	1.3	1.9	24.2527	0.824742	0.491703	5	1	5	5	5	5	3	2	1	2	4
26	32	23	28	154.3	43.9	58	76.5	105	67	4.7	3.8	0.8	1.2	2.45	18.4388	0.75817	0.375891	5	1	5	5	6	5	4	2	1	2	2
	25	30	25	167.3	87	89	98	120	75	4	4.3	1.36	0.86	3.27	31.0833	0.908163	0.531978	5	1	5	5	5	5	3	3	1	2	4
49	34	52	39	152	43.2	60	79.5	112	60	4.2	3.3	0.94	1.17	2.04	18.6981	0.754717	0.394737	5	2	5	5	4	4	3	2	2	1	2
	36	40	30	156.5	49.8			116	60						20.333			5	1	4	4	5	5	3	2	1	2	2
45	26	40	30	156.5	49.9	80	86.5	112	60						20.3738	0.924855	0.511182	4	1	5	5	3	5	2	2	1	1	2
	32	32	34	169.5	63	66	85	120	75	4.3	3.9	0.6	1.84	1.84	21.9281	0.776471	0.389381	5	1	5	5	6	6	3	2	1	2	2
37	35	28	29	161.5	45.2	60	75	112	60	4.3	4	1.49	1.3	2.33	17.3298	0.8	0.371517	5	1	5	5	5	5	3	2	1	1	1
	21	33	39	169.3	46.8	56	79	120	60	5.2	3.3	0.7	1.21	1.99	16.328	0.708861	0.330774	5	1	5	5	5	4	4	2	1	2	1
	29	26	29	157.5	44.3	60	82.5	120	60	5.2	4.5	0.65	1.56	2.65	17.8584	0.727273	0.380952	5	1	5	5	5	5	3	2	1	2	2
33	41	30	34	161.4	48.6	61	83	90	67	4.2	4.7	1.25	1.37	3.08	18.6565	0.73494	0.377943	3	2	5	5	5	4	3	3	1	2	4
32	23	46	32	163	45	60	78	97	67	4.2	4.7	0.67	1.72	2.85	16.937	0.769231	0.368098	2	1	5	5	5	5	3	2	1	1	1
37	22	30	27	175.3	75.3	82	98	108	52	6.3	5.1	0.58	1.87	3.02	24.5037	0.836735	0.46777	5	1	3	5	5	5	5	2	3	3	1
38	45	42	28	168.8	51.4	64	88	108	60	6.2	4.2	1.46	1.32	2.53	18.0392	0.727273	0.379147	5	1	2	5	5	5	4	2	1	1	1
27	37	37	36	169.7	55.4	70.5	80.5	120	60	5.6	5.5	0.58	1.77	3.58	19.2374	0.875776	0.415439	5	1	2	2	5	5	3	2	2	3	4
45	25	41	36	147	46.5	59	84	97	75	4.5	5.1	0.81	2.03	2.63	21.5188	0.702381	0.401361	5	1	2	1	4	3	3	2	3	1	1
28	26	33	28	159.4	43.7	58	80	120	60	5	3.9	0.55	1.64	2.2	17.1991	0.725	0.363864	5	1	5	5	5	4	3	2	1	2	2
41	27	51	35	146	45.5	66	80.5	90	60						21.3455	0.819876	0.452055	5	2	2	2	2	2	3	1	1	2	4
37	26	37	28	161	54.7	74.5	86	90	60	5	3.9	0.63	1.49	2.41	21.1026	0.866279	0.462733	5	2	3	3	4	3	2	1	2	1	1
	36	40	30	175.3	51.5	65	80	112	60	4.6	3.6	0.68	1.13	2.39	16.7588	0.8125	0.370793	3	1	3	4	4	5	3	2	2	1	1
	65	37	29	168.2	59.6	75	91	105	60	5.3	3.4	0.71	1.64	1.67	21.0666	0.824176	0.445898	2	1	4	4	5	5	3	2	2	3	2
48	30	35	29	152.7	51.6	66	94	112	67	4.7	3.4	0.48	1.29	1.97	22.1295	0.702128	0.43222	5	1	4	5	5	5	3	2	1	2	2
	34	52	42	162.5	50.2	63	81	90	67	4.7	4.1	0.78	1.25	2.92	19.0107	0.777778	0.387692	5	1	3	3	5	5	5	2	1	2	2
36	31	43	39	172.8	52.6	68	85	112	67	4.7	2.2	0.69	1.21	0.72	17.6156	0.8	0.393519	5	2	4	4	5	3	3	1	2	2	2
		41	29	173.5	59	69	86	120	60	5.7	3.9	0.6	1.66	2.26	19.5999	0.802326	0.397695	5	2	4	4	5	5	3	2	2	2	2
35	27	44	32	167.5	54	65.6	80	120	75	5.1	3.6	0.7	1.53	1.84	19.247	0.82	0.391642	5	2	3	5	4	2	3	2	1	1	1
34	31	39	34	151.3	38.5	56	80	105	67	4.7	4.6	0.8	1.47	2.84	16.8183	0.7	0.370126	5	1	5	5	5	5	3	2	2	2	2
31	26	31	28	154.5	47.5	61	83.5	112	60	4.2	4.2	0.76	1.81	2.37	19.8992	0.730539	0.394822	5	2	2	5	5	5	4	2	1	2	2
30	22	59	41	162	55.2	69	87.7	112	67	4.3	3.2	2.19	0.99	1.59	21.0334	0.786773	0.425926	5	2	3	5	4	5	3	2	1	1	1
33	28	40	27	156.8	41.9	60	79	105	60	4.5	4.5	1.03	1.12	3.37	17.0421	0.759494	0.382653	5	1	2	5	5	3	3	2	2	1	1
37	32	50	40	164.7	53	68	81	82	52	4.5	4.7	2.3	1.05	3.26	19.5384	0.839506	0.412872	5	1	3	5	4	4	3	2	1	3	2
38	26	50	45	155.5	46.3	66	84	105	60	4.1	3.2	0.85	1.5	1.48	19.1479	0.785714	0.424437	5	1	5	5	5	5	3	1	1	1	2
31	27	44	32	154.8	58.1	76	90	112	67	4.7	4.5	0.69	1.57	2.88	24.2457	0.844444	0.490956	5	1	5	5	5	5	3	2	1	2	3
34	23	41	30	157.2	50.9	67	88	112	67	5	4.8	0.47	1.65	2.99	20.5974	0.761364	0.426209	5	1	5	5	5	4	3	2	3	1	2
43	28	57	33	151.1	42	63.8	80	108	52	5.4	4.4	1.21	1.12	3.02	18.3959	0.7975	0.422237	5	1	4	3	4	5	2	2	2	1	1
25		48	55	182.5	68.6	72	89	120	67	4.5	3.5	0.63	1.3	2.1	20.5967	0.808989	0.394521	5	1	2	5	5	5	3	3	1	4	1
44	33	41	38	156.7	43.9	66.6	82	105	60	4.7	3.8	0.97	1.22	2.35	17.8783	0.812195	0.425016	5	2	5	5	5	5	3	2	1	2	2
26	23	25	26	166.7	49.9	71	86	112	67	4.7	4.9	1.07	1.33	3.33	17.9568	0.825581	0.425915	3	1	5	5	5	5	3	2	1	2	2
43	37	48	45	164.6	56.8	73.5	93	116	67	4.7	3.5	0.89	1.36	1.91	20.9647	0.790323	0.446537	5	1	5	5	5	4	2	2	2	1	2
48	22	20	20	156	44.4	68.7	84	116	67	4.6	3.8	0.59	1.65	2.17	18.2446	0.817857	0.440385	5	1	5	5	4	5	2	2	1	1	1
22	26	20	23	155.8	54.9	72	87	112	60	4.2	5.4	1.2	1.19	3.82	22.6171	0.827586	0.462131	5	2	4	5	5	4	3	2	1	2	3
41	35	43	35	159.7	46.5	60	79.5	90	60	5	2.3	0.94	1.2	0.87	18.2324	0.754717	0.375704	5	1	1	5	1	4	3	2	2	3	1
35	32	30	24	198.7	69.9	80	96	120	67	5.5	4.6	1.17	1.36	3.05	17.7044	0.833333	0.402617	5	2	2	5	5	4	3	2	1	2	3
33	26	34	26	159.3	50.6	71	87	93	52	4.5	2.9	0.39	1.43	1.37	19.9397	0.816092	0.4457	5	2	4	5	4	4	3	3	1	2	2
34	26	43	35	155.7	53.1	61.8	83	112	67	4.4	4.1	0.67	1.53	2.54	21.9037	0.744578	0.396917	5	1	5	5	5	5	3	2	1	1	1
45	35	48	39	159.7	48.5	68	87.5	105	60	4.6	3.8	0.69	1.76	2.05	19.0166	0.777143	0.425798	5	1	5	5	5	5	4	2	2	3	2
41	34	31	37	158.2	46.1	65	84.5	112	67						18.4199	0.769231	0.410872	5	1	4	4	5	5	3	2	1	2	2
27	27	28	22	161.7	52.7	68	88	112	67	5.2	4.1	0.5	1.68	2.41	20.1554	0.772727	0.420532	5	1	5	5	4	5	4	1	1	2	2
43	29	49	43	169.2	58.8	75	86.5	120	67	4.8	5.2	0.53	1.38	3.76	20.5389	0.867052	0.443262	5	1	5	5	5	5	3	1	2	2	2
43	26	52	35	173.5	56.9	65	81	120	67	4.4	3.4	1.22	0.83	2.37	18.9022	0.802469	0.37464	5	1	4	4	5	5	2	2	1	3	2
24	23	50	35	174.8	57.1	70.5	84	112	78	5.1	2.8	0.89	1.26	1.33	18.6876	0.839286	0.403318	5	1	4	4	4	5	3	2	1	2	2
31	27	28	26	153.5	43.4	61.5	82	108	60	5	3.9	0.97	1.47	2.16	18.4193	0.75	0.400651	5	1	5	5	5	5	3	2	1	2	2
28	24	40	35	157.7	55.2	74	91	106	60	4.3	4.1	0.5	1.33	2.74	22.196	0.813187	0.469245	5	2	3	5	4	5	3	1	2	1	2
36	29	34	33	156.4	55.5	79	89	112	60	4	4.1	0.92	1.41	2.32	22.6892	0.88764	0.505115	5	1	3	5	6	5	3	2	2	2	2
38	25	49	45	157	46.2	66	81	120	75	5.2	3.8	0.95	1.63	1.51	18.7432	0.814815	0.420382	5	2	5	5	4	4	2	1	2	1	1
32	41	38	30	151	41.1	62.5	80	75	45	4.6	3.7	0.71	1.39	2.13	18.0255	0.78125	0.413907	5	1	5	5	4	4	4	2	1	1	1
45	40	48	51	172.7	59	77.5	86.5	82	56	5.1	5.1	1.13	1.5	3.27	19.7819	0.895954	0.448755	5	1	3	3	5	5	3	2	2	1	1
45	30	48	34	161.5	48.8	62.6	83	112	60	5	3.5	0.62	1.3	2.12	18.71	0.754217	0.387616	5	2	3	5	5	5	3	2	1	2	1
47	32	50	45	159.6	56.7	73	83	120	67	4.1	5.2	1.35	1.43	3.64	22.2596	0.879518	0.457393	5	1	5	5	2	4	3	1	1	4	4
34	30	46	38	158.6	47.2	59	79	112	60	4.6	4.2	0.65	1.6	2.61	18.7644	0.746835	0.372005	5	2	5	5	5	4	3	2	2	2	2
33	28	35	23	145.7	39.1	64	81	108	60	4.5	3.8	1.4	1.36	2.1	18.4186	0.790123	0.439259	5	2	2	2	3	3	3	2	2	2	1
27	21	50	30	153	45.5	67	78.5	75	45	4.5	3.6	0.59	1.33	2.14	19.437	0.853503	0.437908	5	1	5	5	5	5	3	2	1	1	1
28	25	31	26	166.5	47.9	68.7	85	112	60	4.8	5.2	0.64	2.07	2.88	17.2785	0.808235	0.412613	5	1	5	5	5	5	3	1	2	2	1
29	26	35	29	158	51.9	72	88	116	60	5.4	4.1	1.19	1.28	2.59	20.7899	0.818182	0.455696	5	1	5	5	4	5	3	2	2	1	2
34	27	37	21	152.1	37.8	57	74	108	52						16.3393	0.77027	0.374753	5	1	5	5	5	5	3	2	2	2	2
26	28	26	21	164.5	40.7	59	79	105	67	4.7	3.3	0.6	1.5	1.61	15.0405	0.746835	0.358663	5	1	4	3	5	5	3	2	1	2	2
25	29	35	26	173.4	65.2	78	94.5	112	60	5.2	4.3	0.89	1.36	2.98	21.6845	0.825397	0.449827	5	1	4	5	4	5	5	2	2	1	2
32	20	28	24	167.5	63.4	71	86	112	67	4.7	3.8	0.95	1.09	2.57	22.5975	0.825581	0.423881	5	1	2	2	1	5	2	2	2	3	4
30	26	23	26	160.5	53.6	71	89	112	68	5.1	3.6	1.09	1.38	2.15	20.8073	0.797753	0.442368	5	1	5	5	5	5	3	2	2	2	2
29	23	37	35	168.3	55.4	70.5	82	105	52	5.3	4	0.75	1.46	2.41	19.5588	0.859756	0.418895	5	1	4	4	5	5	3	2	2	2	2
40	25	42	29	155.5	39.3	67	79	108	52	4.9	5.1	1.08	1.51	3.25	16.2529	0.848101	0.430868	5	1	4	4	6	5	3	2	1	1	2
38	34	43	33	163	52.7	70	88.5	112	67	4.5	4.2	1.24	1.57	2.45	19.8351	0.79096	0.429448	5	1	5	5	5	5	3	2	1	2	2
42	27	40	22	161.5	56.5	74	93	150	67	4.5	3.7	0.78	1	2.62	21.6622	0.795699	0.458204	5	1	4	5	5	5	3	2	1	2	2
27	31	50	35	166	49.1	63	82	108	52	4.9	3.5	0.85	1.29	2.21	17.8183	0.768293	0.379518	5	1	5	5	5	5	3	1	1	4	2
41	33	43	36	157.5	38.8	61	79	112	67						15.6412	0.772152	0.387302	5	2	3	3	5	5	3	1	2	2	4
29	24	21	38	162	49.5	61.2	86	112	60	4.1	4.2	0.41	1.55	2.55	18.8615	0.711628	0.377778	5	1	5	5	5	5	3	2	1	1	1
27	21	37	26	157.8	43.2	61	84	105	60	4.2	4.1	1.62	1.19	2.51	17.3488	0.72619	0.386565	5	1	5	5	5	4	3	2	1	2	1
30	25	31	22	154.5	53.5	74	87	112	67	4.7	5.5	1.36	1.32	3.77	22.4128	0.850575	0.478964	5	1	4	5	5	5	3	2	3	1	1
29	30	45	38	166.5	52.5	64.5	79	120	67	4.7	3.4	0.65	1.25	2.03	18.9379	0.816456	0.387387	5	1	5	5	5	4	3	2	2	3	2
47	32	39	31	158.5	66.9	87	98	120	60	4.6	4.44	0.92	1.63	2.56	26.6298	0.887755	0.548896	5	1	4	4	5	5	3	2	1	2	2
47	29	20	23	175.4	59	69.5	84.5	120	67	4.4	4.17	0.61	1.34	2.77	19.1775	0.822485	0.396237	5	2	2	4	6	6	3	3	2	1	1
37	32	43	31	166.3	50.6	66	82	112	60	4.7	4.04	1.4	1.95	2.38	18.2964	0.804878	0.396873	5	1	5	5	5	5	3	2	1	2	1
33	25	35	32	155.7	40.7	59	81	108	67	4.11	3.69	0.73	1.28	2.93	16.7887	0.728395	0.378934	5	1	4	5	5	5	2	1	2	2	1
		53	41	152	45.7	66	81	112	60	4.66	3.78	0.73	1.23	3.39	19.7801	0.814815	0.434211	5	1	5	5	5	5	3	2	1	2	3
49	33	49	41	169	51.2	71.5	89	112	67	4.05	3.99	0.73	1.22	2.33	17.9265	0.803371	0.423077	5	1	5	5	5	6	3	2	2	1	2
30	25	32	26	172	53.3	66	85	105	52	4.78	4.23	0.61	2.24	3.52	18.0165	0.776471	0.383721	5	1	5	5	5	6	2	2	1	2	2
49	44	50	43	172.6	58.2	65	81	105	52	4.32	4.39	0.77	1.6	1.86	19.5363	0.802469	0.376593	5	2	4	3	5	4	3	2	2	3	4
35	32	52	44	159.7	43.3	56	82	112	67	4.73	5.43	0.52	1.59	2.51	16.9777	0.682927	0.350657	5	1	5	5	5	5	4	2	3	4	4
36	29	32	28	165.8	54.8	67	85	105	60	4.01	3.8				19.9348	0.788235	0.404101	5	1	5	5	5	5	3	1	1	2	2
33	20	35	23	169.3	61	77	89	105	56	5.01	4.68				21.2822	0.865169	0.454814	5	1	4	4	5	5	4	2	1	4	4
		38	35	178	48.9	58	81	105	60	4.22	4.26	0.36	1.34	2.2	15.4337	0.716049	0.325843	5	2	5	5	5	4	2	2	2	2	4
43	25	49	34	171.1	54.9	66	82	105	60	5.15	3.04	0.37	1.21	2.67	18.7531	0.804878	0.385739	5	1	4	4	5	5	3	2	3	1	3
30	23	38	25	152	40.5	59	78	105	60	4.44	3.54	1.17	0.75	1.94	17.5294	0.75641	0.388158	5	1	4	4	5	4	3	2	1	2	1
42	32	32	28	155.2	45.8	63	83	105	60	5.23	4.83	0.58	1.33	2.12	19.0144	0.759036	0.405928	5	1	2	5	4	5	3	2	1	1	1
48	34	45	43	157.3	50.4	69	84	112	67	4.27	4.34	0.47	2.34	2.28	20.3692	0.821429	0.438652	5	1	4	4	5	5	3	2	2	1	1
31	22	40	29	177.5	56.4	68	81	116	67	4.48	3.8	0.44	1.83	3.86	17.9012	0.839506	0.383099	5	2	3	5	4	2	4	2	1	1	2
35	29	39	36	159.2	50.7	71	84.7	112	67	4.7	4.43	0.37	1.97	2.2	20.0042	0.838253	0.44598	2	1	5	5	6	3	3	2	1	2	1
48		50	36	159	58.7	85	93	112	67	4.79	3.41	0.48	1.32	3.06	23.219	0.913978	0.534591	5	2	5	5	6	5	2	2	1	2	2
34	31	44	26	166.2	47.1	62	79.6	105	60	4.48	4.15	0.69	1.35	3.5	17.0514	0.778894	0.373045	5	1	5	5	4	5	3	2	1	1	2
45	27	39	27	163.5	47	59	78	105	67	3.73	3.51	0.8	1.07	3.32	17.5818	0.75641	0.360856	5	1	2	5	6	6	4	2	1	2	1
35	29	40	27	156.7	43.6	65.6	81.5	112	67	4.36	4.1	0.64	1.84	2.15	17.7561	0.804908	0.418634	5	1	5	5	4	4	2	2	1	2	2
37	20	33	30	168.2	58.6	66	85	112	60	4.74	3.95	0.51	1.4	2.56	20.7131	0.776471	0.39239	5	1	5	5	5	5	3	3	3	2	1
39	27	35	30	177.6	63	67.7	85.5	108	60	5.02	5.8	0.64	1.43	2.23	19.9735	0.791813	0.381194	5	2	5	2	1	1	2	3	2	1	2
34	35	40	35	165.8	49.7	69	86	112	60	3.87	5.09	0.85	1.7	2.41	18.0795	0.802326	0.416164	5	2	5	5	6	6	4	2	1	2	2
45		48	38	154.1	46.2	62	83	105	52	4.44	5.14	0.8	2.1	1.89	19.4552	0.746988	0.402336	5	1	5	5	5	5	3	2	2	4	2
31	26	27	38	157	40.7	62	78	112	67	3.99	4.58	0.84	1.71	2.8	16.5118	0.794872	0.394904	5	1	5	5	6	5	3	2	2	2	2
23	26	26	29	161.5	49.8	65.7	81	105	52	3.92	3.73	0.68	1.48	3.11	19.0934	0.811111	0.406811	5	1	5	5	5	4	3	2	1	3	3
37	29	33	23	151	45.6	66	80	112	67	5.11	3.36	0.34	1.45	1.66	19.9991	0.825	0.437086	5	1	5	5	4	5	3	2	3	1	1
38	24	53	33	150.7	45.3	66	82	112	60	3.84	4.03	0.65	1.12	1.71	19.9467	0.804878	0.437956	5	2	5	5	6	5	3	2	1	1	2
32	34	35	31	159	44.5	61	83	81	52	4.48	4.04	0.86	1.88	1.97	17.6022	0.73494	0.383648	5	1	5	5	5	4	3	2	2	3	4
41	33	37	37	159.6	53.6	69	84	112	60	4.42	4.44	0.66	0.67	2.31	21.0426	0.821429	0.432331	5	2	3	4	2	5	3	2	2	2	3
33	32	40	30	178.6	91.2	98	101	120	60	4.78	5.26	0.54	1.79	2.51	28.5912	0.970297	0.548712	5	1	5	5	5	5	3	2	2	2	4
35	34	24	26	163.7	45	62	81.7	105	60	4.29	4.76	0.52	1.02	2.56	16.7925	0.758874	0.378742	5	1	4	4	4	4	4	2	2	2	2
23	20	31	29	163	51.7	64	88	105	60	4.33	5.55	0.54	2.13	1.79	19.4588	0.727273	0.392638	5	1	5	5	5	4	3	2	1	2	2
22	22	31	29	156.7	47.1	62	83	75	45	4.7	4.42	0.65	1.78	3.24	19.1815	0.746988	0.39566	5	1	5	5	5	5	3	2	1	2	2
41	36	36	29	162.6	54.6	86	86.5	120	67	5.68	4.05	0.67	1.86	4.07	20.6515	0.99422	0.528905	5	1	3	4	5	4	3	2	1	1	1
22	21	33	26	158.3	51	75	88	112	67	4.73	4.35	1.2	1.24	2.67	20.3521	0.852273	0.473784	5	1	3	5	6	3	3	2	1	1	1
33	20	38	29	154.3	46.4	61	83	105	60	3.82	4.54	0.82	1.38	3.32	19.4888	0.73494	0.395334	5	1	4	5	5	5	3	3	1	2	3
29	30	34	29	175.7	55.4	69	86	105	60	4.71	2.51	0.54	2.15	2.54	17.9459	0.802326	0.392715	5	1	5	5	5	4	3	2	1	2	2
42	39	50	34	160.3	47.7	66	83	105	60	4.38	3.37	0.54	1.57	1.81	18.5631	0.795181	0.411728	5	1	5	5	6	5	1	1	3	2	2
38	31	32	32	164.2	53.1	71	83	108	60	3.98	3.32	0.9	1.66	3.03	19.6946	0.855422	0.4324	5	1	5	5	6	5	3	2	2	1	1
29	20	28	21	155.5	40.1	59.7	75	105	60	4.54	3.04	0.71	1.63	2.64	16.5838	0.796	0.383923	5	1	4	4	6	3	3	2	2	3	2
41	41	40	47	164	57.3	74.5	87.7	108	60	3.91	4.01	0.48	1.76	1.76	21.3043	0.849487	0.454268	5	1	5	5	5	5	3	1	1	1	2
35	21	35	25	176.2	78.9	81.7	93.7	110	75	5.12	4.36	0.58	1.29	2.64	25.4135	0.871932	0.463678	5	2	5	5	4	5	3	2	2	1	1
43	24	44	34	150.4	41.7	60	78	116	67	4.9	3.5	1.19	1.31	1.93	18.4349	0.769231	0.398936	5	2	2	1	3	2	3	2	1	2	2
28	26	25	30	160.3	49.3	68	86	112	67	5.1	3.7	0.94	1.42	2.16	19.1858	0.790698	0.424205	5	1	5	5	6	5	3	2	1	1	1
44	28	26	28	172.7	52.1	75	90	112	60	5.2	3.6	0.82	1.44	2.13	17.4684	0.833333	0.434279	5	1	4	5	5	4	3	2	1	2	2
31	30	29	32	167.5	49.7	65	88	112	60	5.5	4.3	0.93	1.41	2.65	17.7144	0.738636	0.38806	5	1	5	5	5	5	4	2	1	2	2
34	28	43	30	149	39.7	56	78	105	60	5.6	4.3	0.83	1.57	2.51	17.8821	0.717949	0.375839	5	1	4	5	4	3	4	2	2	2	2
40	35	40	35	160.5	43.4	63	78	105	60	4.8	3.7	0.74	1.45	1.97	16.8477	0.807692	0.392523	5	1	5	5	4	4	3	2	1	2	2
30	22	29	23	171.5	47	61	75	120	75	4.1	3.4	0.77	1.22	2.03	15.9797	0.813333	0.355685	5	1	5	5	5	5	3	2	1	2	2
31	27	25	28	158	52.6	65	82	120	75	4.9	4.2	1.06	1.14	2.76	21.0703	0.792683	0.411392	5	1	5	5	5	2	3	2	2	3	2
47	35	55	38	156.4	47.6	64.5	86	112	67	4.8	5.8	0.81	1.75	3.7	19.4596	0.75	0.412404	5	1	5	5	5	5	3	1	2	1	2
33	32	33	29	170.5	68.5	80	96	112	60	5.1	4.1	1.46	0.98	2.76	23.5636	0.833333	0.469208	5	1	5	5	5	5	3	2	1	2	4
32	26	32	27	151.7	47.4	66	81	112	60	4.4	5.6	0.87	1.59	3.94	20.5972	0.814815	0.435069	5	1	5	5	5	5	3	2	3	1	2
26	23	37	30	170.5	71.1	83	95	120	75	4.8	8.1	1.91	1.57	6.24	24.458	0.873684	0.486804	5	1	5	5	5	5	3	1	2	1	2
48	27	31	25	174.8	55.3	74	88.8	120	67	4.9	3.2	0.41	1.32	1.86	18.0985	0.833333	0.423341	5	1	1	4	5	6	3	2	2	1	2
41	34	44	34	156	34.2	58	75	75	52	5.3	2.9	1.2	1.19	1.49	14.0533	0.773333	0.371795	5	1	3	5	5	5	2	2	1	1	2
36	36	55	47	165.5	47.8	65.5	80	105	52	5.8	4.7	1.3	1.47	3.11	17.4515	0.81875	0.39577	5	1	4	5	5	1	3	2	3	3	4
41	34	36	39	169	48.1	59	76	120	75	5.5	3.7	0.51	1.27	2.44	16.8411	0.776316	0.349112	5	1	3	4	5	5	3	2	3	2	3
39	42	39	35	156.2	49.7	69.9	84.9	116	67	5.2	4.4	2.03	1.08	2.97	20.3702	0.823322	0.447503	5	2	5	5	5	4	3	2	1	1	1
30	22	26	28	160.7	51.3	72.7	83	105	60	4.4	2.8	1.71	0.68	1.67	19.8649	0.875904	0.452396	5	1	4	4	5	4	4	2	2	2	2
34	28	41	35	149.5	48.4	66.6	81	105	67	5.4	3.8	0.53	1.86	1.63	21.6552	0.822222	0.445485	5	1	1	3	1	5	3	3	1	2	1
42	38	47	41	167.4	61.2	72	89	112	60	5.1	4.7	0.55	1.46	3.17	21.8394	0.808989	0.430108	5	1	5	5	4	6	4	2	1	1	1
49	22	30	28	156.3	45.3	62	80.5	120	67	4.7	4.4	1.13	1.21	3.02	18.543	0.770186	0.396673	5	1	5	5	4	5	3	2	1	2	4
37	24	45	39	151.3	51.7	77.5	83.5	105	67	4.8	4.8	1.31	1.28	3.18	22.5846	0.928144	0.512227	5	1	4	5	4	5	3	1	2	2	1
38	29	33	24	172.3	64.4	73	89	105	52	4.6	4.3	2.69	1.21	2.7	21.6928	0.820225	0.42368	5	1	5	5	5	5	3	2	1	2	1
29	21	32	26	157.4	57.9	78.5	89	105	67	5.3	4.6	1	1.14	3.11	23.3706	0.882022	0.498729	5	1	5	5	4	4	3	2	1	2	2
45	35	47	31	158.6	50.4	65	86	116	67	4.4	4	0.86	1.06	2.93	20.0366	0.755814	0.409836	5	2	5	5	5	5	3	1	1	2	4
28	26	32	32	158.4	54.7	70	88	120	75	4.2	4.5	1.26	1.01	3.41	21.801	0.795455	0.441919	5	1	5	5	4	5	3	2	1	2	2
37	26	40	28	159.4	48.1	64	84.7	112	67	4.8	3.4	0.54	1.39	1.91	18.9308	0.755608	0.401506	5	1	4	4	5	5	3	2	1	1	1
30	25	28	27	161.4	60.6	72	92	112	67	4.2	4.8	0.78	1.55	3.14	23.263	0.782609	0.446097	5	2	5	5	1	5	2	1	3	4	1
33	28	42	34	189.7	65.1	68.5	83.6	108	60	4.6	3.9	0.72	1.22	2.66	18.0903	0.819378	0.361096	5	1	3	4	5	5	4	1	1	1	1
24	26	30	29	146	39.5	62.6	76	112	60	4.7	4.7	0.96	1.19	3.47	18.5307	0.823684	0.428767	5	1	4	4	4	5	3	2	2	2	2
30	35	32	34	173.5	78.2	86	93.5	112	60	5.3	4.2	1.87	1.06	2.66	25.9781	0.919786	0.495677	5	2	2	2	4	4	2	2	1	1	3
39	25	43	29	175.5	71	82	92	120	75	4.7	4.2	0.8	1.88	2.07	23.0518	0.891304	0.467236	5	2	2	2	5	5	4	1	2	4	4
46	30	50	47	153.3	54.9	80	90.7	120	75	5.3	4.3	0.82	1.41	2.64	23.3608	0.882029	0.521853	5	2	5	5	4	4	3	2	1	2	2
38	24	40	23	178.5	76.4	87.5	95	116	67	4.7	4.1	0.86	1.08	2.91	23.9782	0.921053	0.490196	5	1	4	4	4	5	3	2	1	2	2
42	28	37	36	171.5	53.2	71	83	112	60	4.6	3.5	1.37	0.93	2.41	18.0877	0.855422	0.413994	5	1	5	5	5	6	3	3	2	3	1
44	32	39	30	171.7	72.5	83	91.7	112	60	5.4	3.6	0.5	1.53	1.83	24.5922	0.905125	0.483401	5	1	4	4	6	4	3	2	1	1	3
31	26	33	30	164.4	43.6	64	77	105	60	4.1	3.1	0.69	1.62	1.03	16.1318	0.831169	0.389294	5	1	5	4	4	4	2	2	1	2	1
33	24	32	32	174.2	46.1	62	79	105	67	4.7	4.6	0.86	1.63	2.77	15.1916	0.78481	0.355913	5	1	5	5	5	3	3	2	1	4	4
47	39	40	44	156	40.3	59	79.6	105	60	4.7	4.5	0.91	1.31	3.04	16.5598	0.741206	0.378205	5	1	3	3	4	5	3	1	1	2	2
39	27	28	28	165.8	57.6	71	85.5	105	60	5.4	3.5	0.7	1.62	1.72	20.9533	0.830409	0.428227	5	2	5	5	3	4	3	2	1	2	4
49	22	25	26	157.7	48	65.6	81	112	67	5.5	5	1.21	2.14	2.47	19.3009	0.809877	0.41598	5	1	5	5	5	4	3	2	1	2	3
43	30	54	38	163.1	47.9	59	81.8	116	60	4.3	4.4	0.88	1.51	2.55	18.0064	0.721271	0.361741	5	2	3	5	3	5	3	2	2	2	2
48	30	45	41	164	46.9	66	85	105	60	5.1	3.6	0.75	1.42	2	17.4375	0.776471	0.402439	5	1	3	3	2	5	3	1	1	2	4
31	23	24	23	151	43.9	67.5	78.5	112	60	4.8	3.5	0.82	1.22	2.3	19.2535	0.859873	0.44702	5	1	5	5	5	5	3	2	1	2	2
40	30	28	28	153	57.9	65.5	90	112	67	5.3	3.5	0.69	1.19	2.21	24.7341	0.727778	0.428105	5	1	5	5	6	5	3	1	1	2	3
37	26	39	29	179.7	54.4	61	81	120	75	5.05	4.19	0.42	1.32	1.5	16.8462	0.753086	0.339455	5	1	4	4	5	4	3	2	2	2	2
39	35	46	44	173.2	52.3	66	83	120	75	4.46	5.41	0.45	1.54	1.94	17.4344	0.795181	0.381062	5	2	3	3	5	2	3	2	1	2	1
		36	32	175.6	53.1	63	82.5	120	75	4.8	4.94	0.67	1.56	2.33	17.2205	0.763636	0.35877	5	1	3	4	5	4	3	3	1	2	3
29	21	36	26	168.7	61.9	78.7	89	105	60	4.08	4.05	0.76	1.54	2.85	21.7501	0.88427	0.466509	5	1	5	5	5	5	3	2	1	1	2
29	24	56	41	161.7	50.5	64	80	112	67	4.04	4.28	0.7	1.05	2.18	19.314	0.8	0.395795	5	1	5	5	4	6	3	2	1	1	1
31	24	37	32	166.4	69.7	84	91	120	75	4.07	3.42	1.41	1.19	2.75	25.1725	0.923077	0.504808	5	1	5	5	5	5	3	2	3	3	2
34	34	44	37	171.2	56.9	71	86.5	105	52	3.78	3.84	0.77	1.68	2.33	19.4135	0.820809	0.41472	5	1	3	3	4	4	2	2	3	2	2
36	35	58	40	176.7	63.2	65.5	87	112	60	4.09	4.73	0.61	1.55	2.38	20.2416	0.752874	0.370685	5	1	3	3	2	4	3	2	2	1	2
33	29	38	29	160.7	50.7	74	84.5	120	67	4.73	5.95	0.95	1.67	1.74	19.6325	0.87574	0.460485	5	1	5	5	5	5	3	3	1	2	2
38	32	45	35	175.3	56.9	66	86	120	90	5.4	4.85	0.66	1.9	2.56	18.5161	0.767442	0.376497	5	1	5	5	4	5	2	2	1	2	1
35	27	47	35	172.8	53.8	65	85.5	93	63	3.85	4.76	0.64	1.84	2.43	18.0175	0.760234	0.376157	5	1	4	4	5	5	3	2	1	4	4
27	25	43	31	172.2	57.2	66	87	120	67	4.21	5.27	0.58	1.19	1.37	19.2899	0.758621	0.383275	5	1	3	3	5	3	3	2	1	1	1
31	26	36	32	180	60.2	72	90.8	105	60	5.09	4.9	0.42	1.19	2.18	18.5802	0.792952	0.4	5	1	4	4	6	6	3	2	1	4	4
49	35	44	42	156.6	40.4	57	80	105	82	4.62	4.33	0.67	1.64	2.67	16.474	0.7125	0.363985	5	2	4	4	2	5	3	2	2	4	2
28	29	47	38	166.8	52.9	64	85.5	105	67	4.9	4.46	0.67	1.28	2.51	19.0136	0.748538	0.383693	5	1	4	4	5	5	3	2	1	4	2
35	30	36	33	179.6	60.7	71	84	120	75	4.75	3.98	0.62	1.5	2.43	18.8181	0.845238	0.395323	5	2	4	5	5	3	2	2	1	1	4
46	35	46	42	171.5	55.5	63.7	85	108	52	5.1	4.36	0.55	2.35	2.93	18.8697	0.749412	0.371429	5	1	5	5	6	5	3	2	1	4	4
27	26	38	28	177.4	59.3	68	90	105	60	4.57	4.4	0.75	1.62	2.87	18.8429	0.755556	0.383315	5	1	5	5	5	5	3	3	1	4	4
38	42	29	23	175.8	59.3	66	86	105	52	4.66	4.06	1.2	1.35	2.31	19.1874	0.767442	0.375427	5	1	5	5	5	6	3	3	1	4	2
31	24	43	29	162.3	51.7	64	81	105	60	4.15	4.76	0.71	1.96	2.62	19.627	0.790123	0.394331	5	1	5	5	4	5	3	3	1	2	2
30	31	25	35	154.5	51.3	62	86	112	60	4.77	4.87	0.57	1.18	2.18	21.4912	0.72093	0.401294	5	1	5	5	5	5	2	2	1	1	2
37	35	37	26	170.5	62.1	68	88	112	60	3.74	3.41	0.62	1.34	1.99	21.362	0.772727	0.398827	5	1	5	5	5	5	3	2	1	2	2
28	25	49	31	158.5	55.5	74	90	120	75	4.35	3.39	0.37	1.33	1.22	22.092	0.822222	0.466877	5	1	5	5	1	5	3	2	1	1	2
27	30	29	30	174.8	54.1	81.5	82.5	105	60	3.96	4.34	1.23	1.08	2.75	17.7058	0.987879	0.466247	5	1	5	5	5	5	3	2	1	4	4
36	32	46	34	161.4	50.8	68	83.5	112	60	5.03	3.22	0.38	2.28	2.36	19.501	0.814371	0.421314	5	1	5	5	5	5	3	2	1	2	4
38	25	32	25	173	51.3	63	80	105	60	4.84	4.73	0.37	1.64	2.05	17.1406	0.7875	0.364162	5	1	5	5	5	5	3	2	1	2	2
37	27	33	30	174.6	51.5	63.5	83.5	120	75	4.83	3.89	0.9	1.6	1.81	16.8935	0.760479	0.363688	5	1	4	3	3	5	3	2	2	1	1
20	20	31	28	163.5	47.2	59	80	90	60	5.1	4.26	0.86	1.38	2.28	17.6566	0.7375	0.360856	5	1	2	4	1	5	3	2	1	2	4
49	37	53	48	164.5	48.9	62	78	105	45	4.01	5.41	0.57	2.06	2.49	18.0708	0.794872	0.3769	5	1	5	5	4	4	3	1	2	1	1
45	29	42	37	170.2	60	68.1	91	105	60	5.42	6.25	0.59	1	1.86	20.7125	0.748352	0.400118	5	1	4	5	6	5	4	2	3	2	2
36	32	36	32	185.3	73.7	71.5	98	120	75	4.72	4.43	0.48	0.87	2.28	21.4643	0.729592	0.385861	5	1	3	3	5	5	3	2	1	4	4
22	25	28	28	174.3	54.1	65	88	120	75	5.36	5.29	0.52	0.91	2.25	17.8075	0.738636	0.37292	5	1	5	5	5	5	3	1	1	3	2
24	26	27	31	159.8	43.8	61	81	105	60	4.5	4.97	1.19	0.51	1.81	17.1522	0.753086	0.381727	5	2	4	4	5	5	3	2	1	4	4
27	25	34	27	175.7	60.1	70	90	120	60	3.98	3.69	1.2	1.67	2.62	19.4684	0.777778	0.398406	5	1	3	3	4	6	3	2	2	1	2
44	26	42	31	162.1	59.9	67	87	120	75	4.83	5.2	0.74	1.4	2.23	22.7961	0.770115	0.413325	5	1	4	4	6	5	3	2	1	2	2
		48	24	170.2	63.7	72.5	83	120	75	4.68	4.62	0.56	1.4	1.48	21.9898	0.873494	0.425969	5	1	2	2	4	5	3	2	1	2	2
45	39	52	44	164	53.7	68	87	105	60	4.54	3.77	0.76	1.65	2.31	19.9658	0.781609	0.414634	5	1	2	3	5	5	4	2	1	2	4
42	39	36	34	173.6	69.4	75	90	120	75	4.5	4.35	0.49	1.54	1.68	23.0282	0.833333	0.432028	5	1	5	3	5	6	3	1	1	1	4
35	22	46	30	160.4	42.6	58	79.5	112	60	3.91	3.29	0.59	1.17	1.97	16.5577	0.72956	0.361596	5	1	5	5	5	5	3	2	1	2	2
32	34	31	32	170.4	55.1	63	81	105	60	5.6	5.24	0.81	1.35	2.2	18.9763	0.777778	0.369718	5	2	3	5	5	4	4	2	1	2	2
43	34	46	37	151	50.6	71	85	108	67	5.28	4.84	0.82	1.2	2.62	22.192	0.835294	0.470199	5	1	3	4	5	5	2	2	1	1	1
39	24	32	31	172.5	54.7	65	82	108	60	4.9	4.66	0.73	1.31	1.99	18.3827	0.792683	0.376812	5	1	4	5	5	5	4	2	1	3	1
45	37	44	32	163.7	59.3	69.5	84.5	112	60	5.1	4.82	0.78	1.65	3.37	22.1288	0.822485	0.424557	5	1	4	5	5	4	1	1	2	1	2
33	28	29	28	178.5	58.6	60	84	105	45	5.2	4.62	0.55	1.52	2.77	18.3917	0.714286	0.336134	5	1	5	5	5	5	4	2	1	1	2
27	24	34	31	171	45.3	58	79	108	78	4.2	3.9	0.84	1.42	2.35	15.4919	0.734177	0.339181	5	2	4	4	5	5	3	2	1	2	1
